# Supplementary material for: Activation and modification of carbon dioxide by redox-active low-valent gallium species
Source: Royal Society of Chemistry journal article supplement (doi:10.1039/d1dt01199e), 2021-01-01
Supplement: d1dt01199e22.pdf [file d1dt01199e22.pdf]

## Supporting Information

### Activation and modification of carbon dioxide by redox-active low-valent gallium species

Vladimir A. Dodonov,<sup>a</sup> Olga A. Kushnerova,<sup>a</sup> Evgeny V. Baranov,<sup>a</sup> Alexander S. Novikov,<sup>b</sup> Igor L. Fedushkin\*<sup>a</sup>

<sup>a</sup> G.A. Razuvaev Institute of Organometallic Chemistry of Russian Academy of Sciences, Tropinina str. 49, N. Novgorod, Russia. Email: igorfed@iomc.ras.ru.

<sup>b</sup> Institute of Chemistry, Saint Petersburg State University, Universitetskaya Nab., 7/9, Saint Petersburg 199034, Russia; a.s.novikov@spbu.ru.

All manipulations were carried out under standard Schlenk or glovebox techniques. Solvents were dried according appropriate methods and distilled right prior use. Diphenylketene was prepared according literature procedure<sup>1</sup>, all other chemicals were purchased and used without further purification. The IR spectra of solid compounds were recorded on FSM-1201 spectrometer in Nujol, of gases – in cuvette of 100 mm light path and  $\varnothing$  40 mm CaF<sub>2</sub> cell windows. The NMR spectra were registered on Bruker Advance III (400 MHz) or Bruker AvanceNEO300 (300 MHz) spectrometer and were referenced to the residual signals of deuterated solvents at 298 K unless otherwise stated. Ar=aromatic, d=doublet, m=multiplet, t=triplet, pst=pseudotriplet, s=singlet, br.s=broad singlet, hept=heptet. Chemical shifts are given in ppm. Impurities of diamine (dpp-bian)H<sub>2</sub><sup>2</sup> that might be generated during NMR sample preparation and of common solvents<sup>3</sup> are not indicated in spectra for simplicity. Elemental analyses were performed with an Elementar Vario micro cube instrument. Solutions of [(dpp-bian)GaNa(DME)<sub>3</sub>] (**1**)<sup>4</sup> were prepared by stirring of digallane [(dpp-bian)GaGa(dpp-bian)]<sup>5</sup> with an equivalent of sodium metal in dimethoxyethane (DME) until the latter complete dissolution.

**Synthesis of [(dpp-bian)Ga(CO<sub>2</sub>)<sub>2</sub>Ga(dpp-bian)][Na(DME)<sub>2</sub>]<sub>2</sub> (**2**).** A solution of 1 mmol [(dpp-bian)GaNa(DME)<sub>2</sub>] in 10 ml of DME was treated with 25 ml (298 K, 1 atm) of carbon dioxide. The solution color changed from yellow-green to emerald-green. The solution was stirred for 10 minutes. Vacuum was applied briefly to remove excess of the gas. Layering the solution with 40 ml of pentane gave green crystals of complex **2**. Yield 0.78 g, 93 %. Elemental analysis C<sub>92</sub>H<sub>125</sub>Ga<sub>2</sub>N<sub>4</sub>Na<sub>2</sub>O<sub>13</sub> (1680.42): calc. C 65.77, H 7.50, N 3.33 %; found: C 66.01, H 7.58, N 3.34 %. <sup>1</sup>H NMR (400 MHz, THF-d<sub>8</sub>) 7.04 – 6.87 (m, 6H), 6.74 (d, J = 8.2 Hz, 2H), 6.58 (dd, J = 8.2, 6.9 Hz, 2H), 5.59 (d, J = 6.8 Hz, 2H), 3.90 (hept, J = 6.7 Hz, 2H), 3.52 (hept, J = 6.8 Hz, 2H), 1.09 (d, J = 7.1 Hz, 6H), 0.82 (d, J = 6.9 Hz, 6H), 0.77 (d, J = 6.9 Hz, 6H), 0.73 (d, J = 6.8 Hz, 6H). <sup>13</sup>C NMR (101 MHz, THF-d<sub>8</sub>) 164.8 (OCO), 147.7, 145.3, 144.8, 137.0, 132.3, 127.6, 126.1, 125.5, 123.2, 123.0, 121.4, 121.2, 115.8, 27.4 (CH-iPr), 26.9 (CH-iPr), 24.7 (CH<sub>3</sub>-iPr), 24.6 (CH<sub>3</sub>-iPr), 23.8 (CH<sub>3</sub>-iPr), 23.7 (CH<sub>3</sub>-iPr). IR (Nujol, v/cm<sup>-1</sup>): 517 W, 542 W, 625 W, 646 W, 669 W, 762 S, 797 S, 808 S, 858 M, 880 M, 899 M, 926 S, 936 M, 961 M, 980 M, 999 M, 1030 M, 1084 S, 1113 S, 1125 S, 1177 S, 1190 S, 1210 M, 1262 S, 1310 S, 1323 S, 1350 S, 1431 S, 1493 S, 1512 S, 1590 M, 1613 W, 1671 W.

**Synthesis of {[(dpp-bian)Ga(CO<sub>2</sub>)<sub>2</sub>Ga(dpp-bian)][Na(DME)(CH<sub>3</sub>OCH<sub>2</sub>-)]<sub>2</sub>]<sub>n</sub> (**3**).** The same procedure as for **2**, followed by slow concentration (to approx. volume of 1.5 ml) of the solution instead of layering with pentane. Item by item examination of XRD parameters of obtained crystals gave compound **3** among crystals of **2**.

**Synthesis of [(dpp-bian)Ga(CO<sub>2</sub>)<sub>2</sub>Ga(dpp-bian)][Na(18-crown-6)]<sub>2</sub> (4).** A solution of 1 mmol [(dpp-bian)GaNa(DME)<sub>2</sub>] in 10 ml of DME was treated with 25 ml (298 K, 1 atm) of carbon dioxide. The solution color changed from yellow-green to emerald-green. The solution was stirred for 10 minutes. Vacuum was applied briefly to remove excess of the gas. A solution of 0.264 g of 18-crown-6 in 5 ml of DME was added. The mixture was left unshaken for 2 days. That resulted in formation of yellow-green crystals of **4**. Yield 0.58 g, 64 %. Elemental analysis C<sub>108</sub>H<sub>153</sub>Ga<sub>2</sub>N<sub>4</sub>Na<sub>2</sub>O<sub>21</sub> (2028.81), calc. C 63.94, H 7.60, N 2.76 %; found C 63.76, H 7.77, N 2.59 %. <sup>1</sup>H NMR (400 MHz, THF-d<sub>8</sub>, 328 K) 7.18 – 7.06 (m, 8H), 6.90 – 6.85 (m, 4H), 6.63 (d, *J* = 8.3 Hz, 4H), 6.54 (t, *J* = 7.5 Hz, 4H), 5.63 (d, *J* = 6.8 Hz, 4H), 4.01 (hept, *J* = 6.7 Hz, 4H), 3.95 (hept, *J* = 6.7 Hz, 4H), 1.28 (d, *J* = 6.7 Hz, 12H), 0.97 (d, *J* = 6.8 Hz, 12H), 0.92 (d, *J* = 6.8 Hz, 12H), 0.46 (d, *J* = 6.8 Hz, 12H). <sup>13</sup>C NMR (101 MHz, THF-d<sub>8</sub>, 328 K, indirect observation) 147.89, 146.7, 137.9, 129.6, 129.5, 126.0, 122.1, 120.3, 115.3, 27.3 (CH-iPr), 26.3 (CH-iPr), 25.3 (CH<sub>3</sub>-iPr), 24.8 (CH<sub>3</sub>-iPr), 24.1 (CH<sub>3</sub>-iPr), 23.9 (CH<sub>3</sub>-iPr). IR (Nujol, v/cm<sup>-1</sup>): 403 W, 424 M, 444 W, 503 W, 521 M, 548 W, 586 W, 625 M, 646 W, 679 W, 760 S, 806 S, 826 M, 847 W, 899 M, 928 S, 935 S, 995 W, 1063 S, 1101 S, 1173 M, 1188 W, 1236 S, 1258 S, 1352 S, 1429 S, 1510 S, 1582 S, 1611 S.

**Thermal decomposition of 2.** A sealed evacuated ampule containing a solution **2** in 10 ml of DME prepared from 1 mmol of [(dpp-bian)GaNa(DME)<sub>2</sub>] and 1 mmol of CO<sub>2</sub> was heated overnight at 120°C. Solution color changed to blue-green. Concentration of the solution (to approx. volume of 4 ml) gave 0.192 g (34%) of blue crystals, which NMR- and IR- spectra matched with ones of digallane [(dpp-bian)GaGa(dpp-bian)].<sup>5</sup>

**Synthesis of [(dpp-bian)Ga(CO<sub>3</sub>)(O)Ga(dpp-bian)][Na<sub>2</sub>(THF)<sub>5</sub>] (5).** A solution of **2** in 10 ml of DME was prepared from 1 mmol of [(dpp-bian)GaNa(DME)<sub>2</sub>] and 1 mmol of CO<sub>2</sub>. All volatiles and the solvent were removed in vacuum. The residue was dissolved in hot THF (60°C) and placed in a sealed evacuated vessel. Heating continued for 1h. The evacuation – dissolution – heating cycle was repeated two more times. Final solution color of the was blue-green. Concentration of the obtained solution (to approx. volume of 2 ml) gave 0.076 g of blue crystals of **5**. Layering the mother liquor with 20 ml of hexanes gave additional 0.428 g of **5**. Total yield 0.504 g, 59 %. Elemental analysis C<sub>97</sub>H<sub>130</sub>Ga<sub>2</sub>N<sub>4</sub>Na<sub>2</sub>O<sub>10</sub> (1697.46), calc. C 68.63, H 7.72, N 3.30 %; found C 68.37, H 7.86, N 3.54 %. <sup>1</sup>H NMR (400 MHz, THF-d<sub>8</sub>) 7.02 (d, *J* = 4.5 Hz, 8H), 6.92 (d, *J* = 4.5 Hz, 4H), 6.80 (d, *J* = 8.2 Hz, 4H), 6.64 (dd, *J* = 8.2, 7.0 Hz, 4H), 5.73 (d, *J* = 6.9 Hz, 4H), 3.96 – 3.77 (m, 8H, CH-iPr), 1.32 (d, *J* = 6.8 Hz, 12H, CH<sub>3</sub>-iPr), 0.99 (d, *J* = 6.9 Hz, 12H, CH<sub>3</sub>-iPr), 0.90 (d, *J* = 6.8 Hz, 12H, CH<sub>3</sub>-iPr), 0.54 (d, *J* = 6.9 Hz, 12H, CH<sub>3</sub>-iPr). <sup>13</sup>C NMR (101 MHz, THF-d<sub>8</sub>) 198.0 (CO<sub>3</sub>), 147.3, 145.8, 144.7, 137.1, 133.8, 128.3, 128.1, 126.2, 123.2, 123.0, 122.0, 121.4, 115.9, 27.5 (CH-iPr), 26.8 (CH-iPr), 25.5 (CH<sub>3</sub>-iPr), 24.6 (CH<sub>3</sub>-iPr), 24.1 (CH<sub>3</sub>-iPr), 23.8 (CH<sub>3</sub>-iPr). IR (Nujol, v/cm<sup>-1</sup>): 465 VW, 498 VW, 517 W, 540 W, 550 W, 590 VW, 623 M, 644 W, 669 W, 683 W, 706 W, 760 VS, 779 W, 808 VS, 839 M, 899 VS, 924 VS, 936 S, 999 W, 1049 VS, 1071 S, 1105 M, 1136 M, 1179 S, 1190 M, 1210 M, 1258 S, 1323 VS, 1346 VS, 1431 VS, 1518 VS, 1590 M, 1613 W.

**Synthesis of [(dpp-bian)GaOC(O)C(Ph)<sub>2</sub>C(CPh<sub>2</sub>)O][Na(DME)<sub>2</sub>] (6).** 0.389 g (2 mmol) of diphenylketene was added to a solution of 1 mmol of **2** in 10 ml of DME. Color of the solution changed to yellow-green with concomitant extrusion of gas within 10 min. All volatiles and the solvent were removed in vacuum. The residue was dissolved in 10 ml of Et<sub>2</sub>O. Slow concentration (to approx. volume of 2 ml) gave blue crystals of **6**. Yield 0.353 g, 30 %. Elemental analysis C<sub>72</sub>H<sub>80</sub>Ga<sub>2</sub>N<sub>4</sub>NaO<sub>7</sub> (1178.09): C 73.40, H 6.84, N 2.38 %; found C 73.84, H 6.89, N 2.35 %. <sup>1</sup>H NMR (400 MHz, THF-d<sub>8</sub>) 7.52 (d, *J* = 8.0 Hz, 2H), 7.33 – 7.13 (m, 10H), 7.12 – 6.99 (m, 8H), 6.90 – 6.76 (m, 5H), 6.71 – 6.57 (m, 7H), 6.49 (t, *J* = 7.5 Hz, 2H), 6.18 (d, *J* = 7.8 Hz, 2H), 5.58 (s, 2H), 4.12 (s, 2H), 1.24 (d, *J* = 6.8 Hz, 6H), 1.08 (d, *J* = 6.8 Hz, 6H), 0.88 (d, *J* = 6.7 Hz, 6H), 0.83 (d, *J* = 6.7 Hz, 6H). <sup>13</sup>C NMR (101 MHz, THF-d<sub>8</sub>) 204.2 (O<sub>2</sub>C), 147.5, 147.2, 144.7, 144.5, 143.0, 142.7, 138.7, 132.0, 130.3, 129.8, 129.1, 128.2, 126.8, 126.4, 126.0, 125.0, 124.2, 123.5, 123.2, 122.8, 122.5, 121.8, 117.6, 116.2, 71.5 (C=CPh<sub>2</sub>), 63.5 (OC=CPh<sub>2</sub>), 27.9 (CH-iPr), 27.4 (CH-iPr), 24.5 (CH<sub>3</sub>-iPr), 23.6 (CH<sub>3</sub>-iPr), 23.0 (CH<sub>3</sub>-iPr). IR (Nujol, v/cm<sup>-1</sup>): 544 W, 588 M, 612 W, 696 S, 762 M, 781 M, 801 M, 851 M, 911 M, 924 M, 936 M, 966 M, 1001 W, 1013 M, 1034 M, 1071 M, 1086 M, 1113 M, 1156 M, 1192 M, 1211 M, 1254 M, 1283 M, 1302 M, 1325 S, 1339 S, 1366 S, 1489 M, 1518 W, 1576 W, 1597 W, 1659 M.

**Synthesis of [(dpp-bian)GaN(Cy)C(O)N(Cy)C(O)O]<sub>2</sub>[Na(DME)<sub>2</sub>]<sub>2</sub> (7).** 0.250 g (2 mmol) of cyclohexyl isocyanate was added to a solution of 1 mmol of **2** in 10 ml of DME. Color of the solution changed to blue-green with concomitant extrusion of gas within 10 min. Vacuum was applied briefly to remove gaseous products. The solution was layered with 30 ml of Et<sub>2</sub>O, what gave blue crystals of **7**. Yield 0.362 g, 35 %. Elemental analysis C<sub>118</sub>H<sub>169</sub>Ga<sub>2</sub>N<sub>8</sub>Na<sub>2</sub>O<sub>12.7</sub> (2088.3), calc. C 67.81, H 8.09, N 5.36 %; found C 68.02, H 8.28, N 5.57 %. <sup>1</sup>H NMR (300 MHz, THF-d<sub>8</sub>) 7.22 – 7.11 (m, 5H), 6.95 (d, *J* = 8.1 Hz, 2H), 6.75 (t, *J* = 8.1 Hz, 2H), 5.80 (d, *J* = 7.6 Hz, 2H), 3.84 (br. s, 4H), 3.06 (br. s, 1H), 2.14 (s, 1H), 1.98 – 1.84 (m, 4H), 1.80 – 1.62 (m, 9H), 1.57 – 1.30 (m, 14H), 1.25 (d, *J* = 6.6 Hz, 6H), 1.07 (d, *J* = 6.6 Hz, 6H), 0.78 (br. s, 12H). <sup>13</sup>C NMR (75 MHz, THF-d<sub>8</sub>) 167.8 (OCO), 158.0(NCO), 146.6, 143.7, 136.0, 131.8, 128.7, 128.0, 126.3, 126.2, 125.1, 124.5, 122.8, 122.3, 116.6, 53.2 (CH-Cy), 52.8 (CH-Cy), 34.7 (CH<sub>2</sub>-Cy), 33.9 (CH<sub>2</sub>-Cy), 27.8 (CH-iPr), 27.7 (CH-iPr), 26.1 (CH<sub>2</sub>-Cy), 25.6 (CH<sub>2</sub>-Cy), 25.4 (CH<sub>2</sub>-Cy), 25.2 (CH<sub>2</sub>-Cy), 24.5 (CH<sub>3</sub>-iPr), 23.9 (CH<sub>3</sub>-iPr), 23.7 (CH<sub>2</sub>-Cy). IR (Nujol, v/cm<sup>-1</sup>): 463 VW, 500 VW, 519 W, 538 VW, 550 VW, 588 W, 608 VW, 623 W, 648 W, 683 W, 760 S, 777 W, 799 M, 810 M, 839 M, 860 M, 901 M, 926 M, 936 M, 955 VW, 997 W, 1005 W, 1028 M, 1057 M, 1080 S, 1105 M, 1121 M, 1132 M, 1179 M, 1188 M, 1210 M, 1246 S, 1264 S, 1341 S, 1435 S, 1514 S, 1557 M, 1593 M, 1622 M.

**Synthesis of [(dpp-bian)GaN(Ph)C(O)O]<sub>2</sub>[Na(DME)<sub>2</sub>]<sub>2</sub> (8).** 0.119 g (1 mmol) of phenylisocyanate was added to a solution of 1 mmol of **2** in 10 ml of DME. Color of the solution changed to blue-green with concomitant extrusion of gas within 10 min. Vacuum was applied briefly to remove gaseous products. The solution was layered with 40 ml of pentane, what gave blue crystals of **8**. Yield 0.510 g, 28 %. Elemental analysis C<sub>102</sub>H<sub>130</sub>Ga<sub>2</sub>N<sub>6</sub>Na<sub>2</sub>O<sub>12</sub> (1817.58), calc. C 67.40, H 7.21, N 4.62 %; found C 67.01, H 7.02, N 4.46 %. <sup>1</sup>H NMR (400 MHz, THF-d<sub>8</sub>) 7.48 – 7.39 (m, 5H), 7.18 – 7.04 (m, 10H), 6.96 (d, *J* = 8.3 Hz, 2H), 6.76 (t, *J* = 7.5 Hz, 2H), 6.70 (d, *J* = 7.2 Hz, 2H), 5.73 (d, *J* = 6.9 Hz, 2H), 3.98 – 3.89 (hept, *J* = 6.7 Hz, 4H), 1.05 (d, *J* = 7.1 Hz, 12H), 0.96 (d, *J* = 6.7 Hz, 12H). <sup>13</sup>C NMR (75 MHz, THF-d<sub>8</sub>) 165.7 (NCO), 146.9, 146.2, 144.1, 136.4, 132.3, 128.8, 128.5, 127.8, 126.3, 124.3, 122.8, 119.6, 118.5, 116.7, 27.9 (CH-iPr), 24.2 (CH<sub>3</sub>-iPr), 24.1 (CH<sub>3</sub>-iPr). IR (Nujol, v/cm<sup>-1</sup>): 465 W, 517 W, 550 W, 573 W, 590 M, 621 W, 648 W, 669 W, 693 M, 754 S, 808 M, 837 W, 858 M, 907 W, 924 M, 936 W, 961 W, 995 W, 1028 W, 1080 M, 1111 W, 1179 W, 1188 W, 1210 W, 1246 W, 1277 VW, 1314 W, 1333 W, 1514 M, 1593 M, 1624 M, 1638 M, 1655 M, 1711 M.

**Synthesis of [(dpp-bian)Ga(O)(CO<sub>3</sub>)Ga(dpp-bian)]<sub>2</sub>[Na(DME)<sub>2</sub>][Na(DME)<sub>3</sub>]<sub>2</sub> (9).** 0.091 g (0.5 mmol) of azobenzene was added to a solution of 1 mmol of **2** in 10 ml of DME. Color of the solution changed to blue-green within 10 min. The solution was cooled to –20°C and was layered with 50 ml of cold (–20 °C) mixture of 1:1 C<sub>6</sub>H<sub>6</sub>:pentane, what gave blue crystals of **9**. Yield 0.150 g, 9 %. The compound is susceptible to decomposition at room temperature in vacuum (~10 min), THF, benzene or hexane solvents. No reasonable NMR spectra were collected due to decomposition during sample preparation. Elemental analysis C<sub>195.44</sub>H<sub>261.37</sub>Ga<sub>4</sub>N<sub>8</sub>Na<sub>4</sub>O<sub>24</sub> (3477.57), calc. C 67.44, H 7.52, N 3.23 %; found C 67.97, H 7.91, N 3.52 %. IR (Nujol, v/cm<sup>-1</sup>): 465 VW, 513 M, 536 W, 550 W, 573 W, 585 W, 625 W, 646 W, 669 W, 693 M, 741 S, 760 VS, 787 M, 808 S, 841 S, 862 S, 878 M, 899 M, 926 S, 938 M, 986 M, 999 W, 1032 S, 1063 M, 1088 VS, 1113 S, 1127 S, 1161 M, 1177 M, 1194 S, 1210 M, 1260 S, 1283 S, 1323 S, 1354 VS, 1364 VS, 1431 VS, 1485 S, 1516 S, 1549 S, 1591 S, 1601 S, 1674 M.

**Synthesis of [(dpp-bian)Ga(OTMS)(N<sub>3</sub>)]<sub>2</sub>[Na(DME)<sub>3</sub>] (10).** 0.115 g (1 mmol) of TMSN<sub>3</sub> was added to a solution of 1 mmol of **2** in 10 ml of DME. No change in solution color and evolution of gas were observed. The solution was cooled to –20°C and was layered with 40 ml of cold (–20 °C) pentane, what gave blue crystals of **10**. Yield 0.412 g, 41 %. NMR was registered in protio-DME due to decomposition in THF-d<sub>8</sub>. Elemental analysis C<sub>51</sub>H<sub>79</sub>Ga<sub>2</sub>N<sub>5</sub>NaO<sub>7</sub>Si (995.00), calc. C 61.56, H 8.00, N 7.04 %; found C 61.80, H 8.23, N 6.89 %. <sup>1</sup>H NMR (400 MHz, protio-DME, no lock) 7.85 – 7.59 (m, 7H), 7.51 (t, *J* = 7.3 Hz, 1H), 7.41 (d, *J* = 8.6 Hz, 1H), 7.26 (t, *J* = 8.0 Hz, 1H), 4.69 (br. s, 2H, CH-iPr), 4.34 (br. s, 2H, CH-iPr), 1.91 (d, *J* = 6.5 Hz, 6H, CH<sub>3</sub>-iPr), 1.79 (d, *J* = 6.8 Hz, 6H, CH<sub>3</sub>-iPr), 1.73 (d, *J* = 6.8 Hz, 6H, CH<sub>3</sub>-iPr), 1.48 (d, *J* = 6.3 Hz, 6H, CH<sub>3</sub>-iPr), 0.33 (s, 9H, CH<sub>3</sub>-TMS). <sup>13</sup>C NMR (101 MHz, protio-DME, no lock) 147.7, 144.6, 137.0, 132.9, 126.9, 126.5, 124.8, 124.1, 123.3, 122.7, 122.3, 116.6, 28.2 (CH-iPr), 28.0(CH-iPr), 25.2 (CH<sub>3</sub>-iPr), 24.8 (CH<sub>3</sub>-iPr), 24.7 (CH<sub>3</sub>-iPr),

23.6 (CH<sub>3</sub>-iPr), 3.0 (TMS). <sup>29</sup>Si NMR (79.5 MHz, protio-DME, indirect observation) 1.0. IR (Nujol, v/cm<sup>-1</sup>): 467 VW, 521 W, 536 VW, 550 W, 569 VW, 600 W, 623 M, 654 M, 669 W, 681 W, 721 M, 764 S, 783 M, 808 S, 837 M, 860 S, 905 M, 924 S, 936 M, 968 M, 997 M, 1019 M, 1030 M, 1086 S, 1105 M, 1123 M, 1159 W, 1179 M, 1190 M, 1210 M, 1244 M, 1254 M, 1264 M, 1321 M, 1343 M, 1491 M, 1510 S, 2101 S.

**Synthesis of [(dpp-bian)Ga(OTMS)(Cl)][Na(THF)<sub>2</sub>(Et<sub>2</sub>O)] (11).** A 0.109 g (1 mmol) of TMSCl was added to a solution of 1 mmol of **2** in 10 ml of DME. Evolution of gas and no change in solution color was observed. The solution was cooled to -20°C and was layered with 40 ml of cold (-20 °C) mixture of 1:1 THF:Et<sub>2</sub>O, what gave green crystals of **11**. Yield 0.328 g, 35 %. NMR was registered in protio-DME due to decomposition in THF-d<sub>8</sub>. Elemental analysis C<sub>51</sub>H<sub>75</sub>ClGa<sub>2</sub>NaO<sub>4</sub>Si (936.40), calc. C 65.41, H 8.07, N 2.99 %; found C 61.8, H 8.23, N 6.89 %. <sup>1</sup>H NMR (400 MHz, protio-DME, no lock) 7.38 – 6.76 (m, 5H), 6.65 (t, J = 7.3 Hz, 1H), 4.15 (br. s, 4H, CH-iPr), 4.34 (br. s, 2H, CH-iPr), 1.23 (br. s, 12H, CH<sub>3</sub>-iPr), 1.07 (br. s, 6H, CH<sub>3</sub>-iPr), 1.01 (br. s, 6H, CH<sub>3</sub>-iPr), -0.15 (s, 9H, CH<sub>3</sub>-iPr). <sup>29</sup>Si NMR (79.5 MHz, THF-d<sub>8</sub>, indirect observation) 5.1. IR (Nujol, v/cm<sup>-1</sup>): 469 W, 498 VW, 521 W, 550 VW, 621 W, 648 W, 669 W, 683 W, 721 M, 747 M, 764 S, 783 W, 806 M, 816 M, 835 S, 857 M, 909 W, 922 S, 936 M, 1001 S, 1034 W, 1057 W, 1111 M, 1136 W, 1184 W, 1210 M, 1252 S, 1316 S, 1331 S, 1343 S, 1364 M, 1443 VS, 1510 S, 1537 W, 1590 M, 1615 W

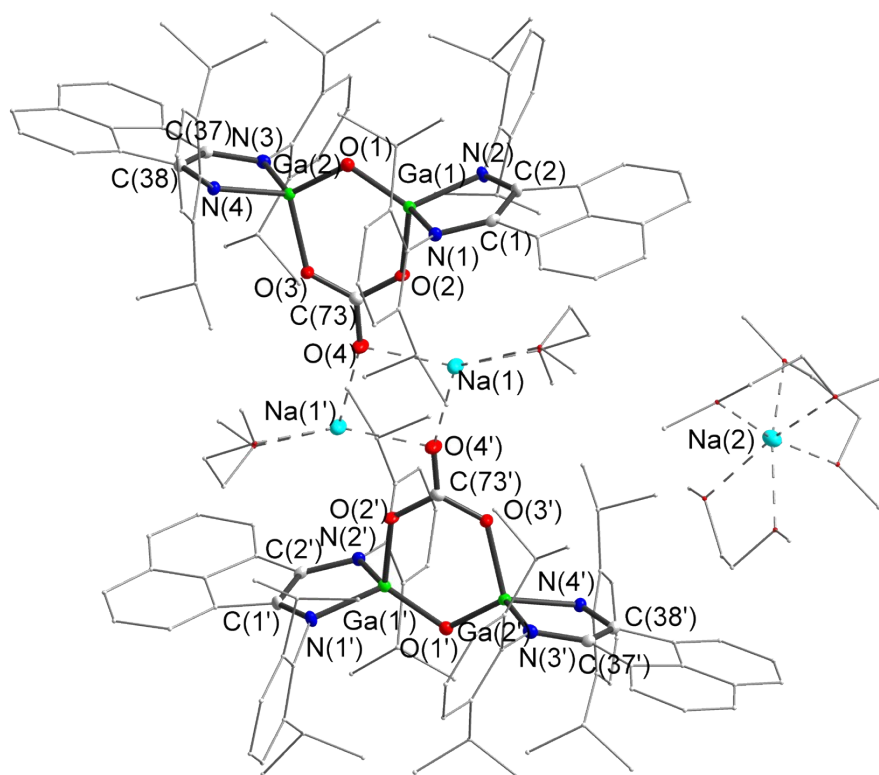

Figure S1. Molecular structure of **9**. Thermal ellipsoids are drawn at 30% probability level. Hydrogen atoms and Na(2') cation are omitted. Selected bond lengths (Å) and angles (°): Ga(1)-N(1) 1.912(4), Ga(1)-N(2) 1.913(4), Ga(1)-O(2) 1.920(3), N(1)-C(1) 1.391(6), N(2)-C(2) 1.392(6), O(2)-C(73) 1.315(6), O(3)-C(73) 1.299(6), O(4)-C(73) 1.241(6), C(1)-C(2) 1.366(6), Ga(1)-O(1) 1.775(3), O(1)-Ga(1)-N(1) 125.58(16), O(1)-Ga(1)-N(2) 118.92(16), N(1)-Ga(1)-N(2) 90.37(16), O(1)-Ga(1)-O(2) 107.58(14), N(1)-Ga(1)-O(2) 104.28(16), N(2)-Ga(1)-O(2) 108.07(16), C(1)-N(1)-Ga(1) 105.9(3), C(2)-N(2)-Ga(1) 105.6(3), C(73)-O(2)-Ga(1) 129.1(3), C(2)-C(1)-N(1) 118.7(4), C(1)-C(2)-N(2) 119.2(4), O(4)-C(73)-O(3) 121.0(4), O(4)-C(73)-O(2) 118.3(4), O(3)-C(73)-O(2) 120.6(4), O(1)-Ga(1)-N(1) 125.58(16).

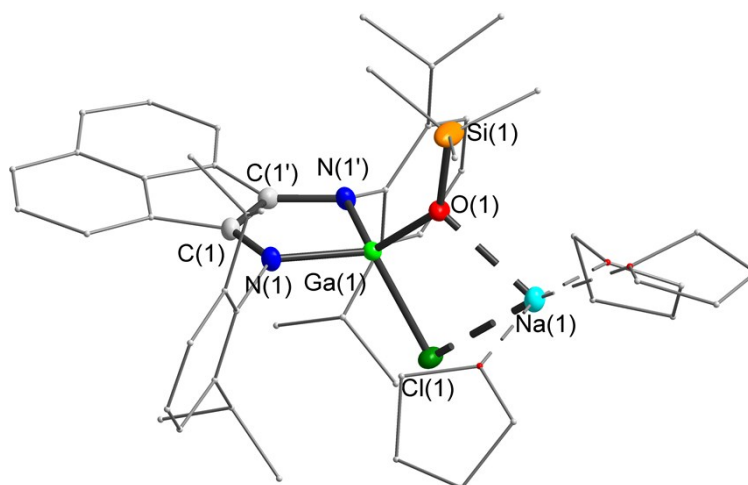

Figure S2. Molecular structure of **11**. Thermal ellipsoids are drawn at 30% probability level. Hydrogen atoms are omitted. Selected bond lengths (Å) and angles (°): Ga(1)-O(1) 1.824(3), Ga(1)-N(1) 1.904(2), Ga(1)-Cl(1) 2.2238(11), N(1)-C(1) 1.397(4), N(1)-C(8) 1.429(4), C(1)-C(1') 1.383(6), C(1)-C(2) 1.463(4), O(1)-Ga(1)-N(1) 119.21(9), N(1)-Ga(1)-N(1') 91.72(15), O(1)-Ga(1)-Cl(1) 97.35(10), N(1)-Ga(1)-Cl(1) 115.49(8), C(1)-N(1)-Ga(1) 105.06(18).

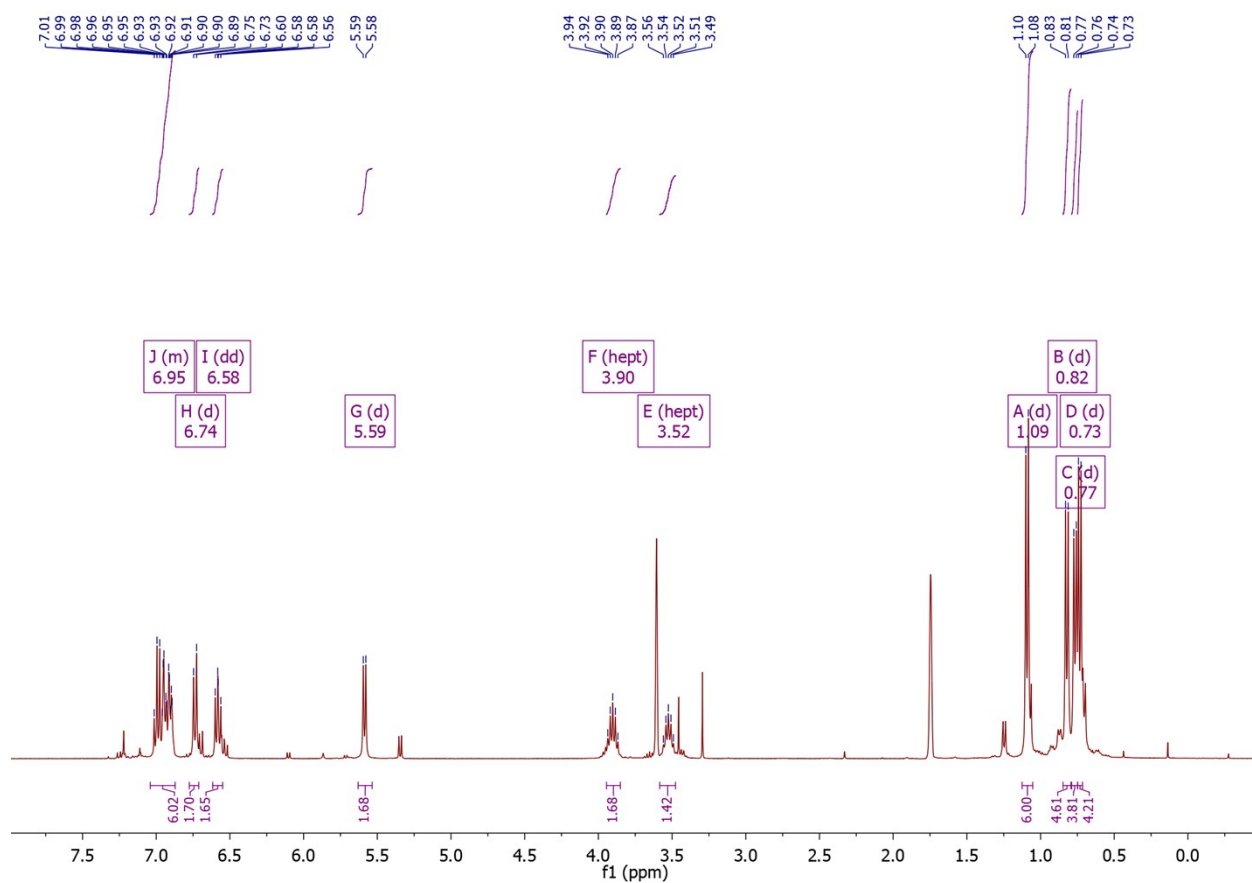

Figure S3.  $^1\text{H}$  NMR spectrum of **2** at 298 K in  $\text{thf-d}_8$ .

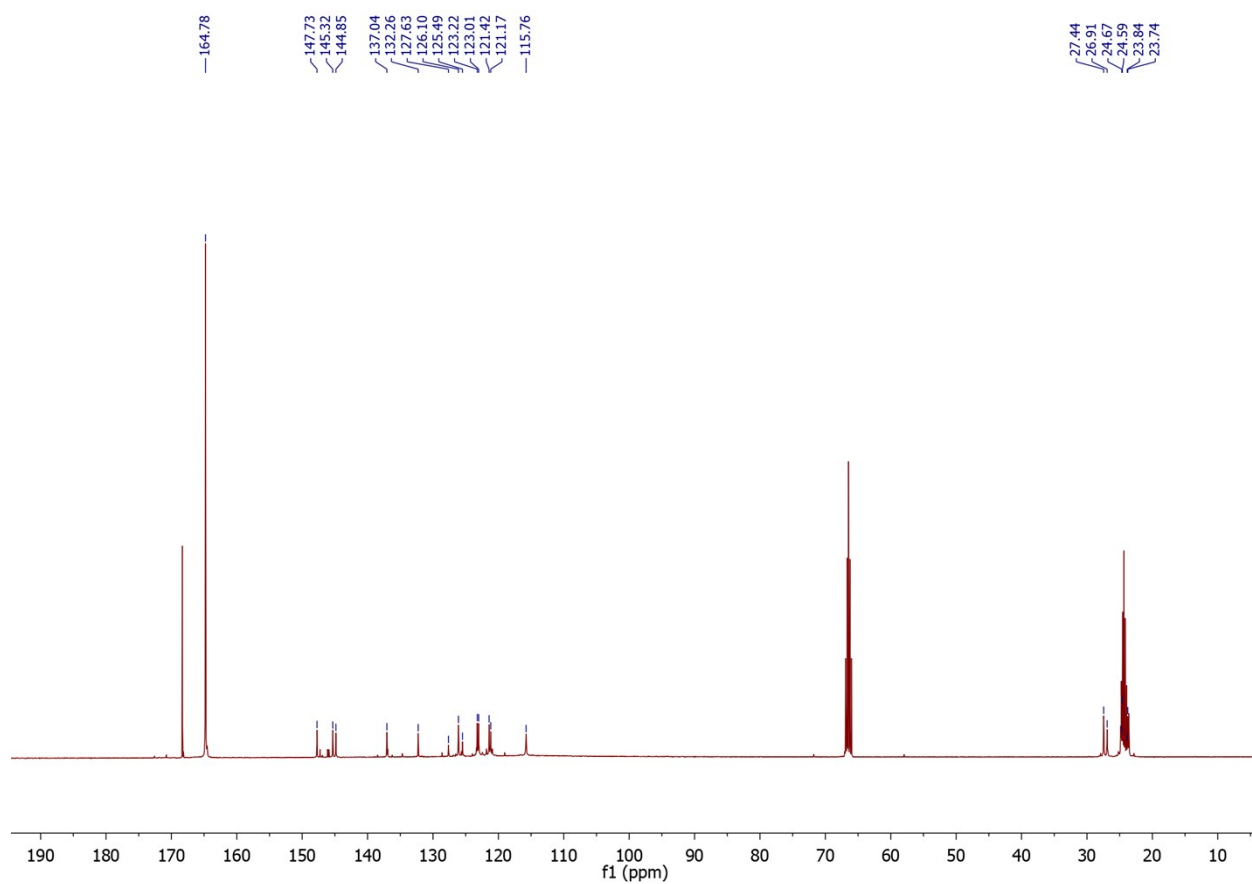

Figure S4.  $^{13}\text{C}$  NMR spectrum of **2** (prepared from  $^{13}\text{CO}_2$ ) at 298 K in  $\text{thf-d}_8$ .

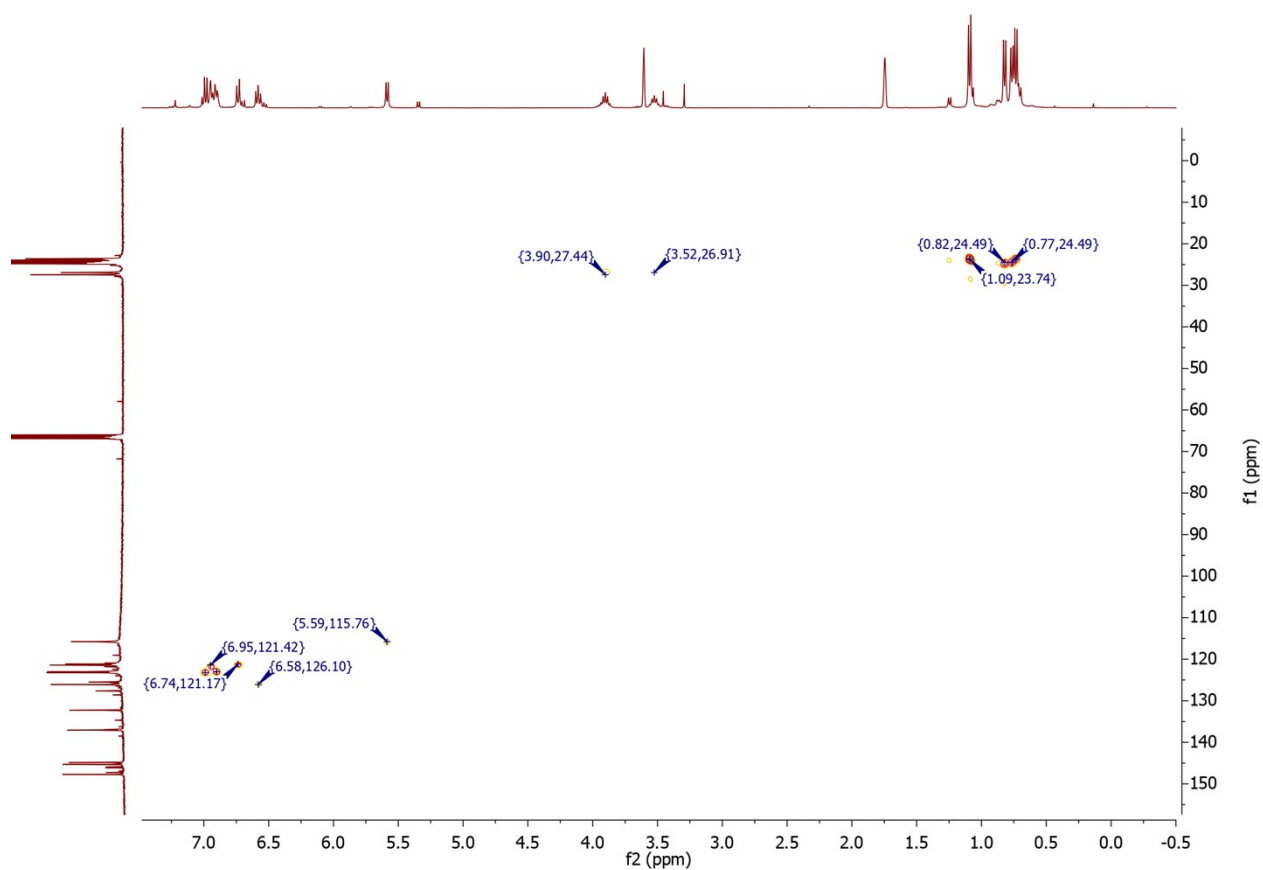

Figure S5.  $^1\text{H}$ - $^{13}\text{C}$  HSQC NMR spectrum of **2** at 298 K in  $\text{thf-d}_8$ .

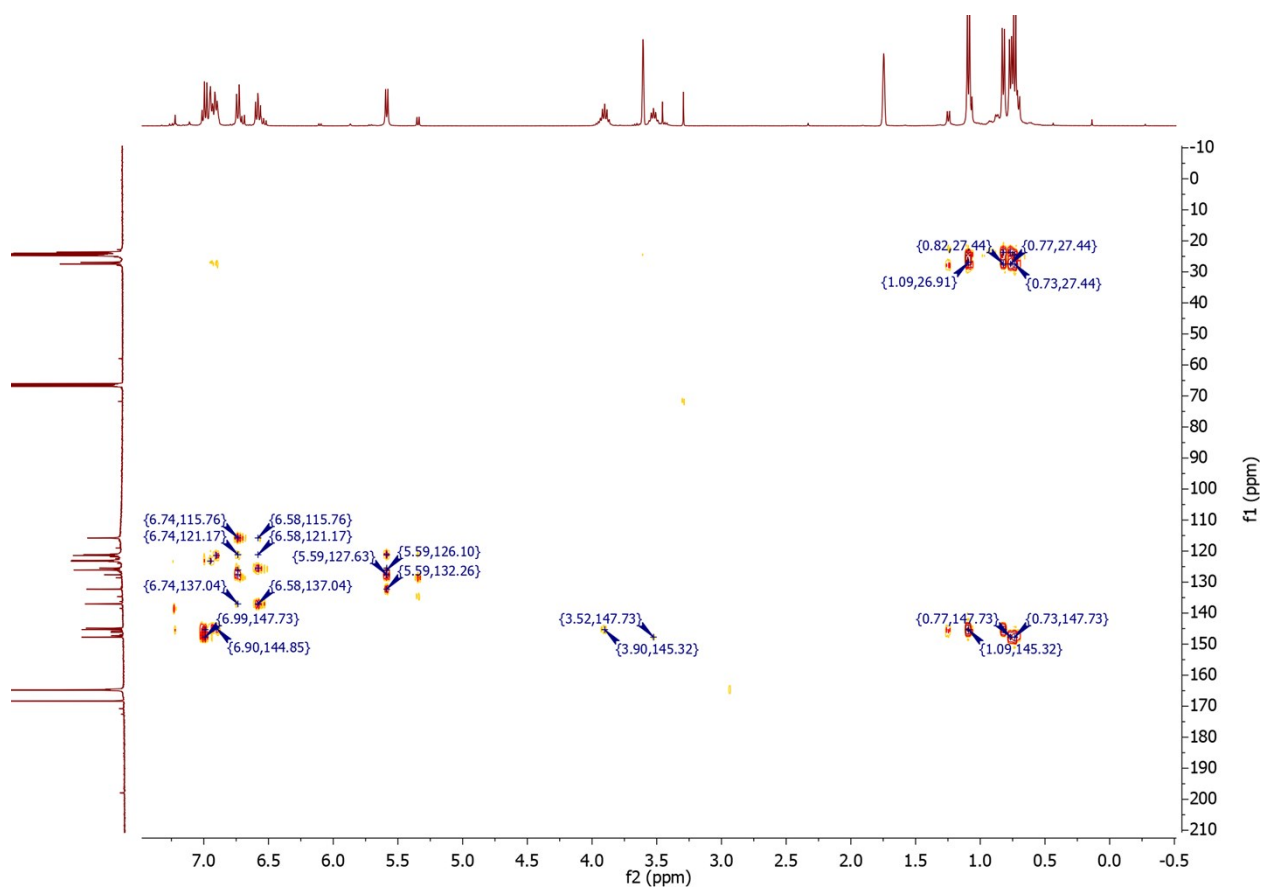

Figure S6.  $^1\text{H}$ - $^{13}\text{C}$  HMBC NMR spectrum of **2** at 298 K in  $\text{thf-d}_8$ .

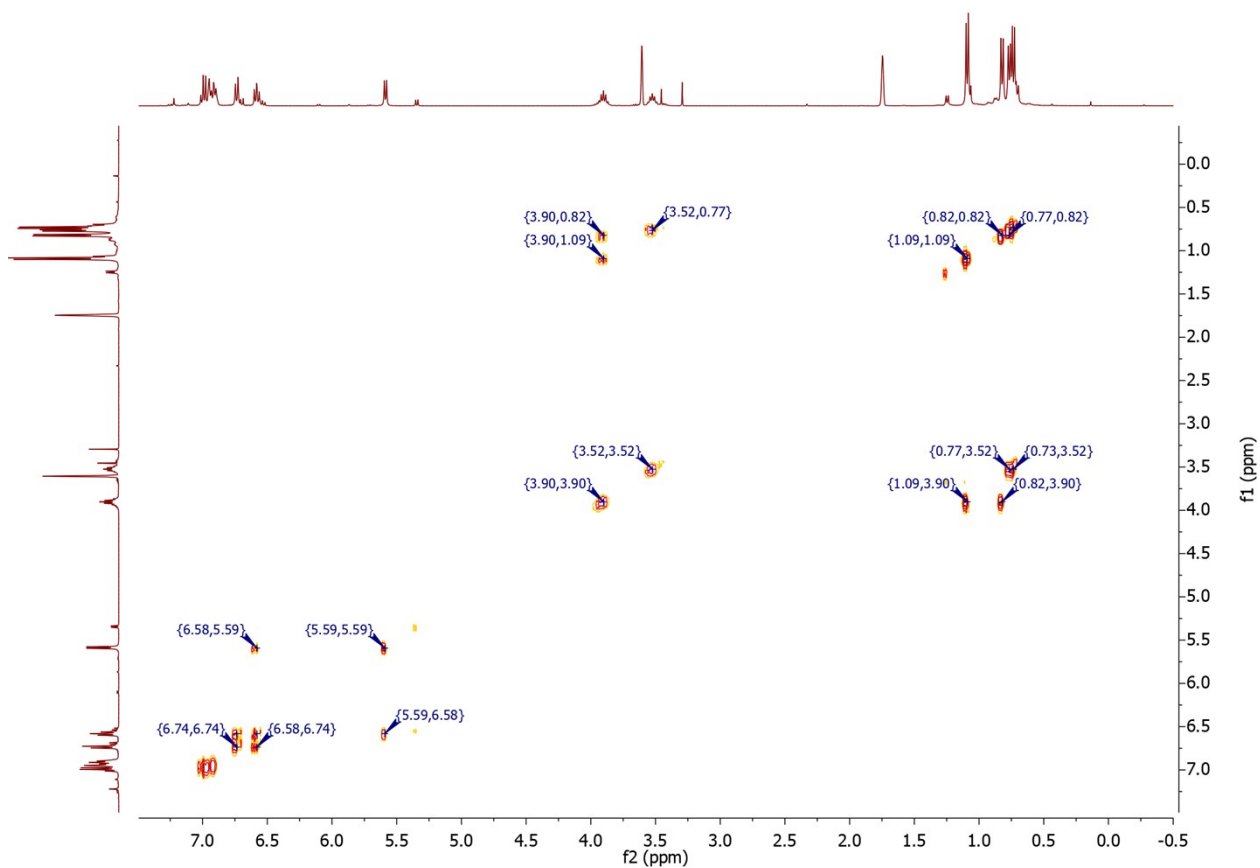

Figure S7.  $^1\text{H}$ - $^1\text{H}$  COSY NMR spectrum of **2** at 298 K in  $\text{thf-d}_8$ .

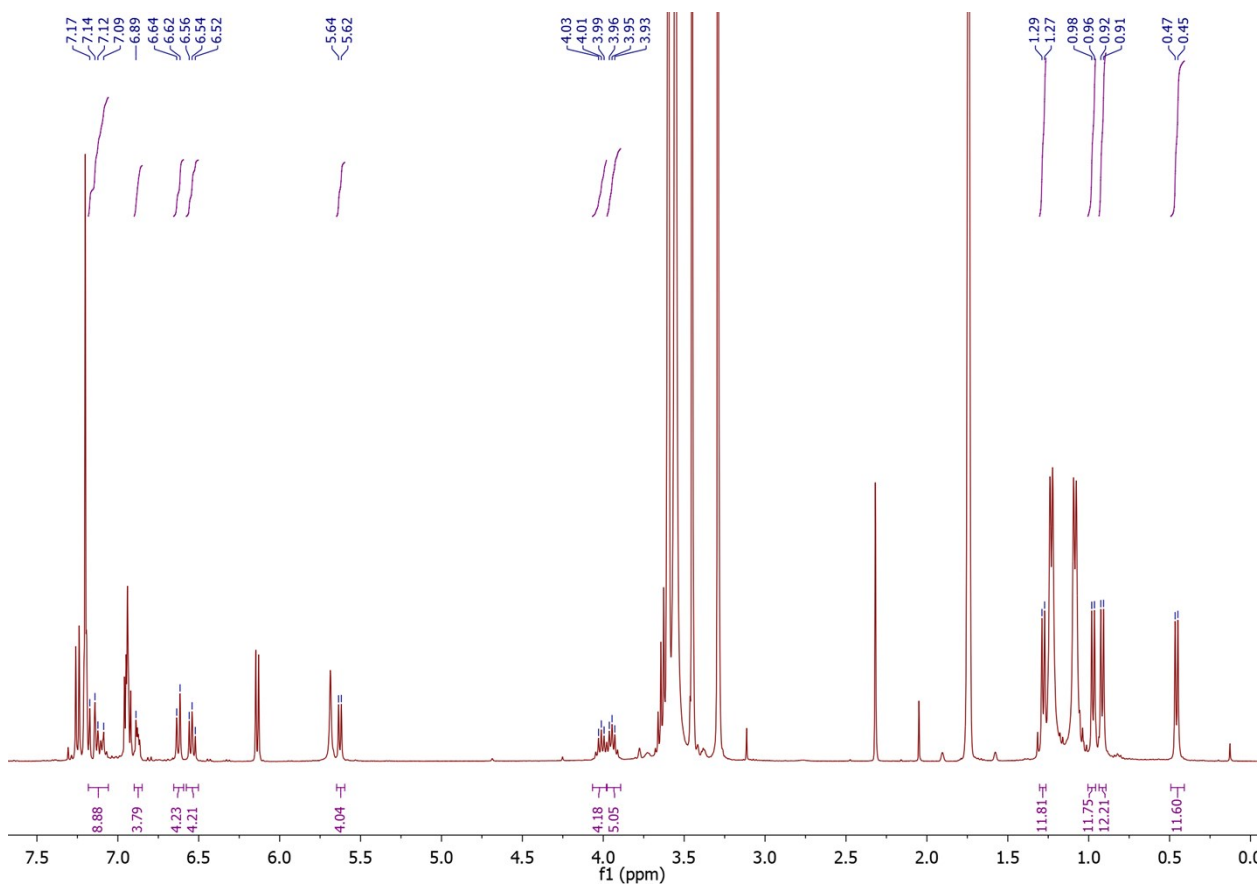

Figure S8.  $^1\text{H}$  NMR spectrum of **4** at 328 K in  $\text{thf-d}_8$ .



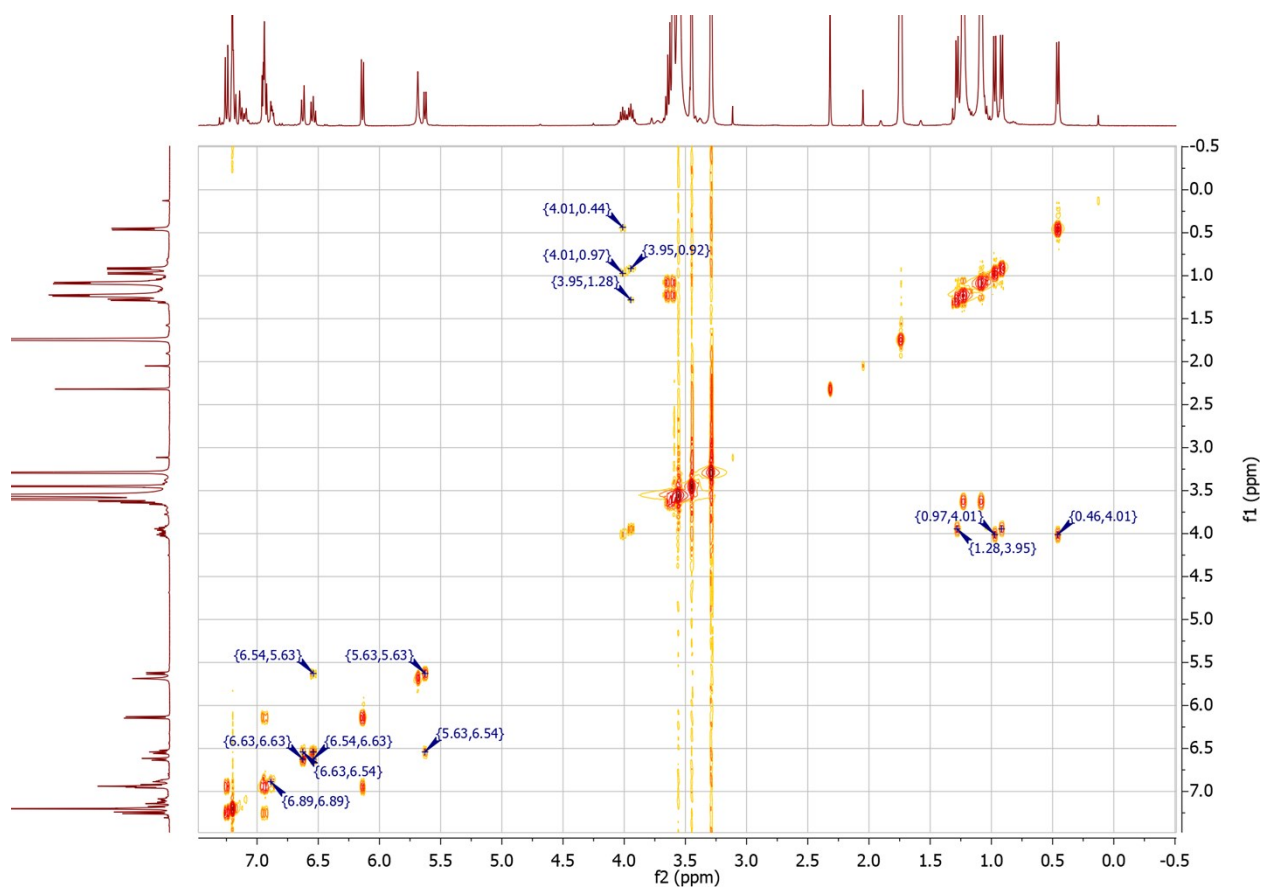

Figure S9.  $^1\text{H}$ - $^1\text{H}$  COSY NMR spectrum of **4** at 328 K in  $\text{thf-d}_8$ .

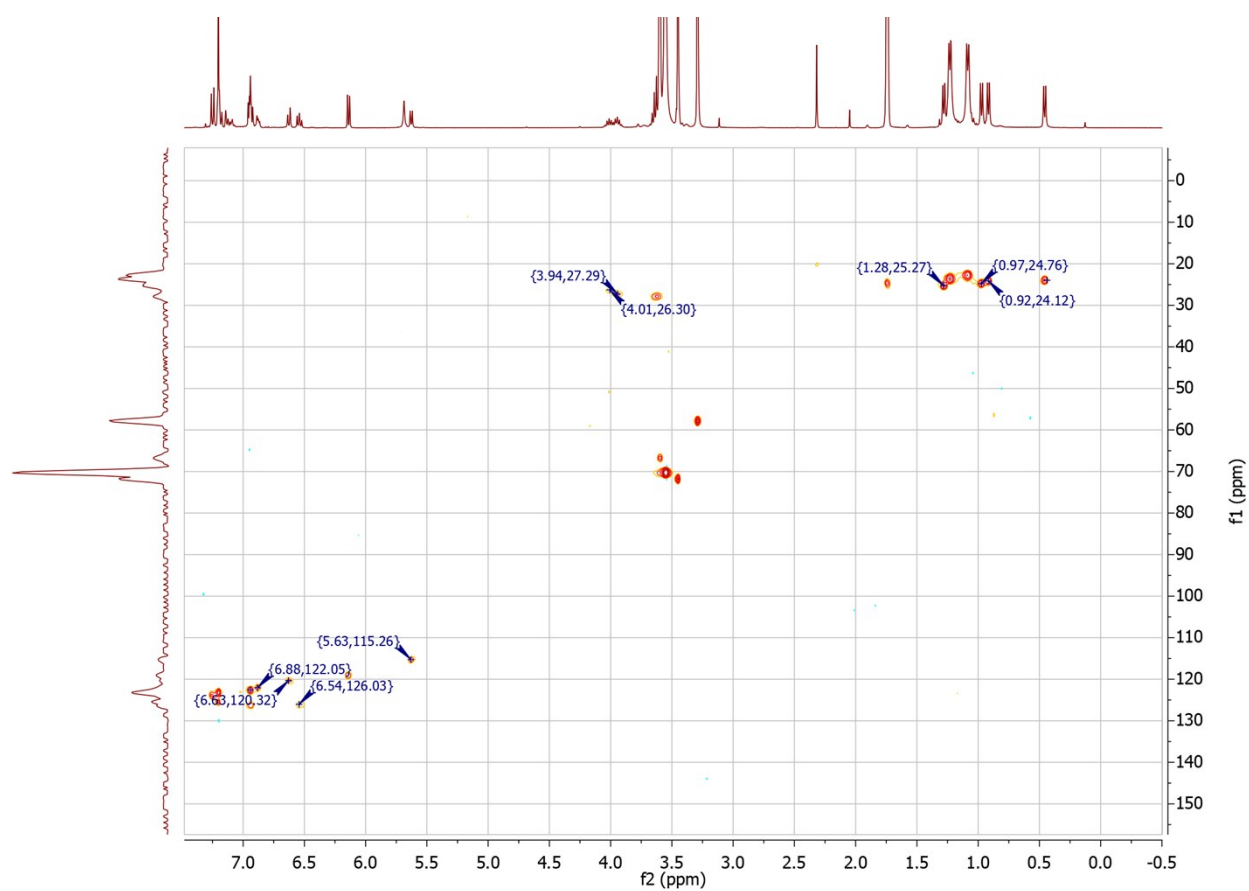

Figure S10.  $^1\text{H}$ - $^{13}\text{C}$  HSQC NMR spectrum of **4** at 328 K in  $\text{thf-d}_8$ .

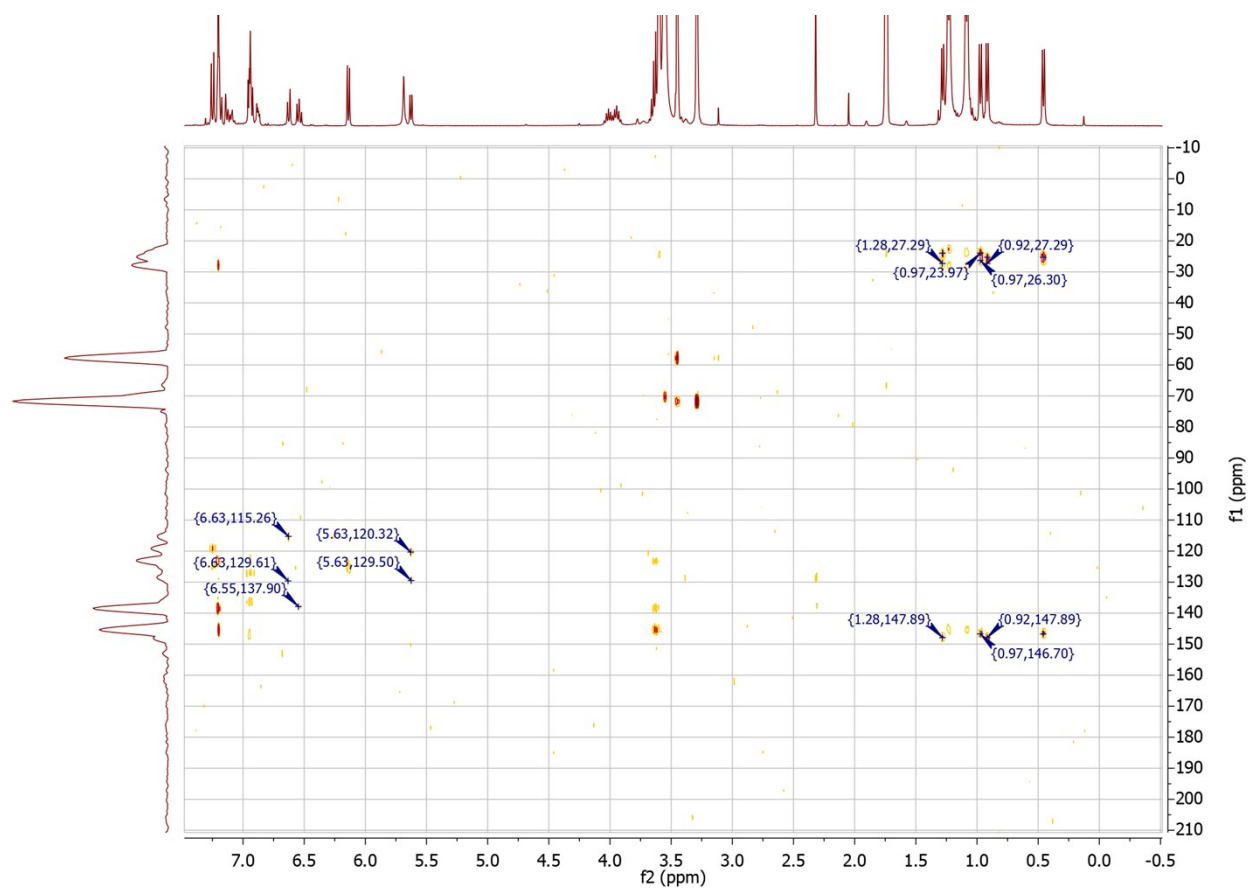

Figure S11.  $^1\text{H}$ - $^{13}\text{C}$  HMBC NMR spectrum of **4** at 328 K in  $\text{thf-d}_8$ .

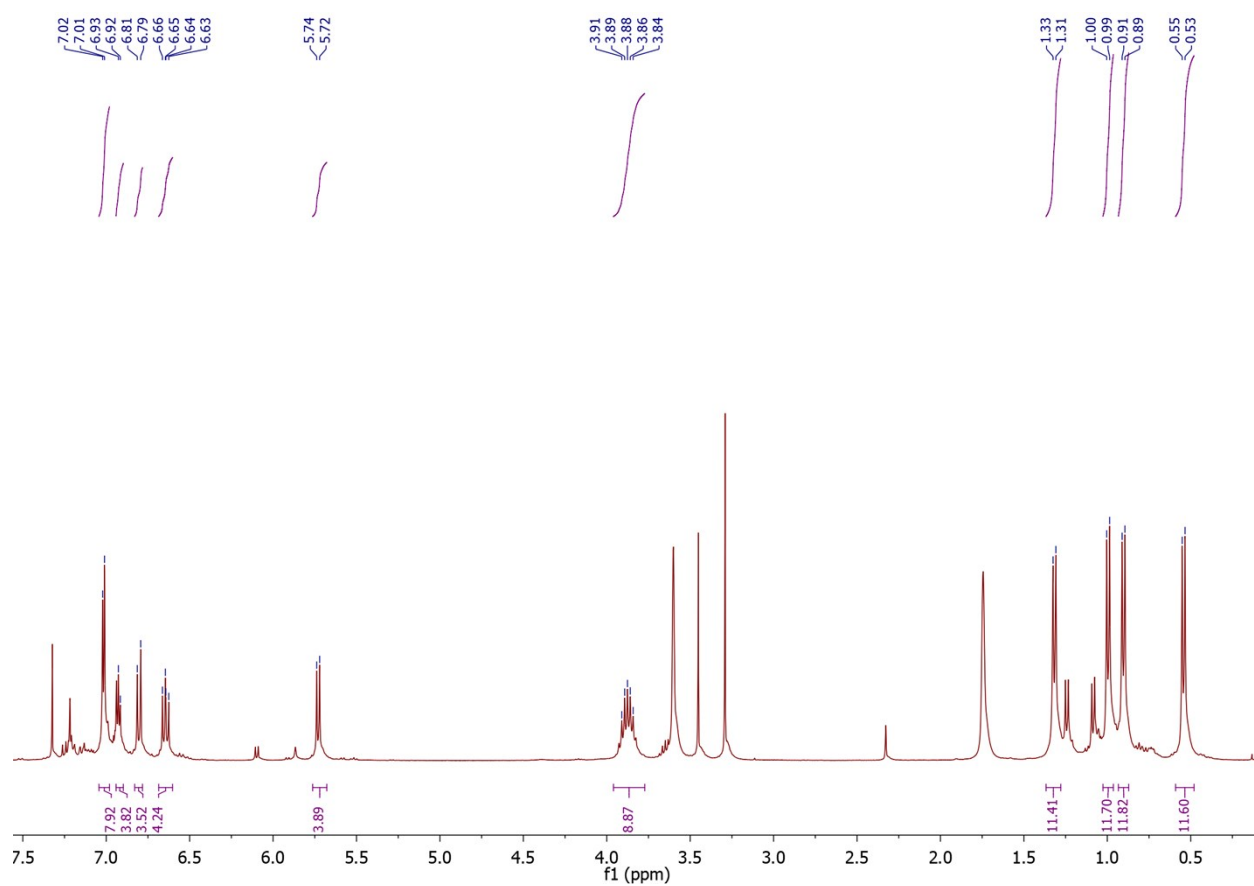

Figure S12.  $^1\text{H}$  NMR spectrum of **5** at 298 K in  $\text{thf-d}_8$ .

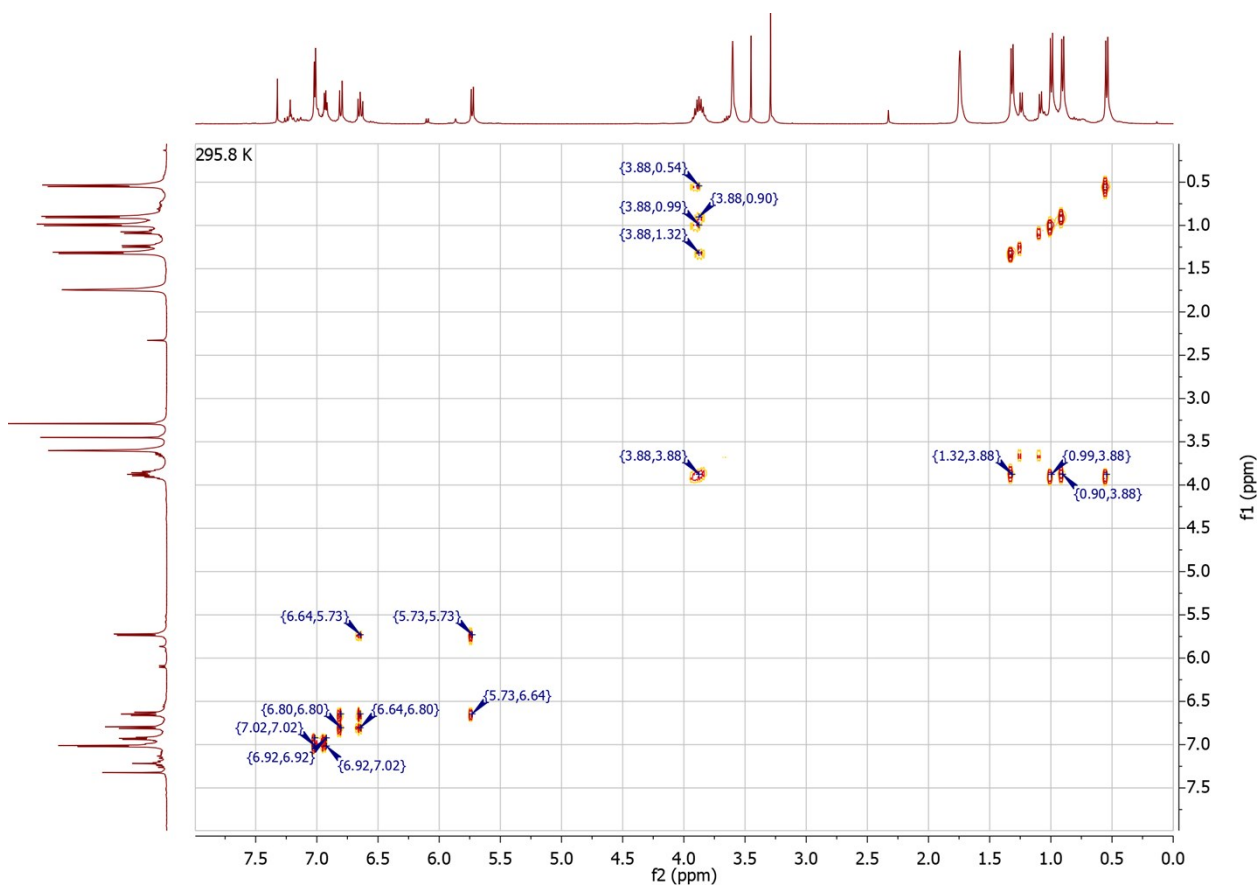

Figure S13.  $^1\text{H}$ - $^1\text{H}$  COSY NMR spectrum of **5** at 298 K in  $\text{thf-d}_8$ .

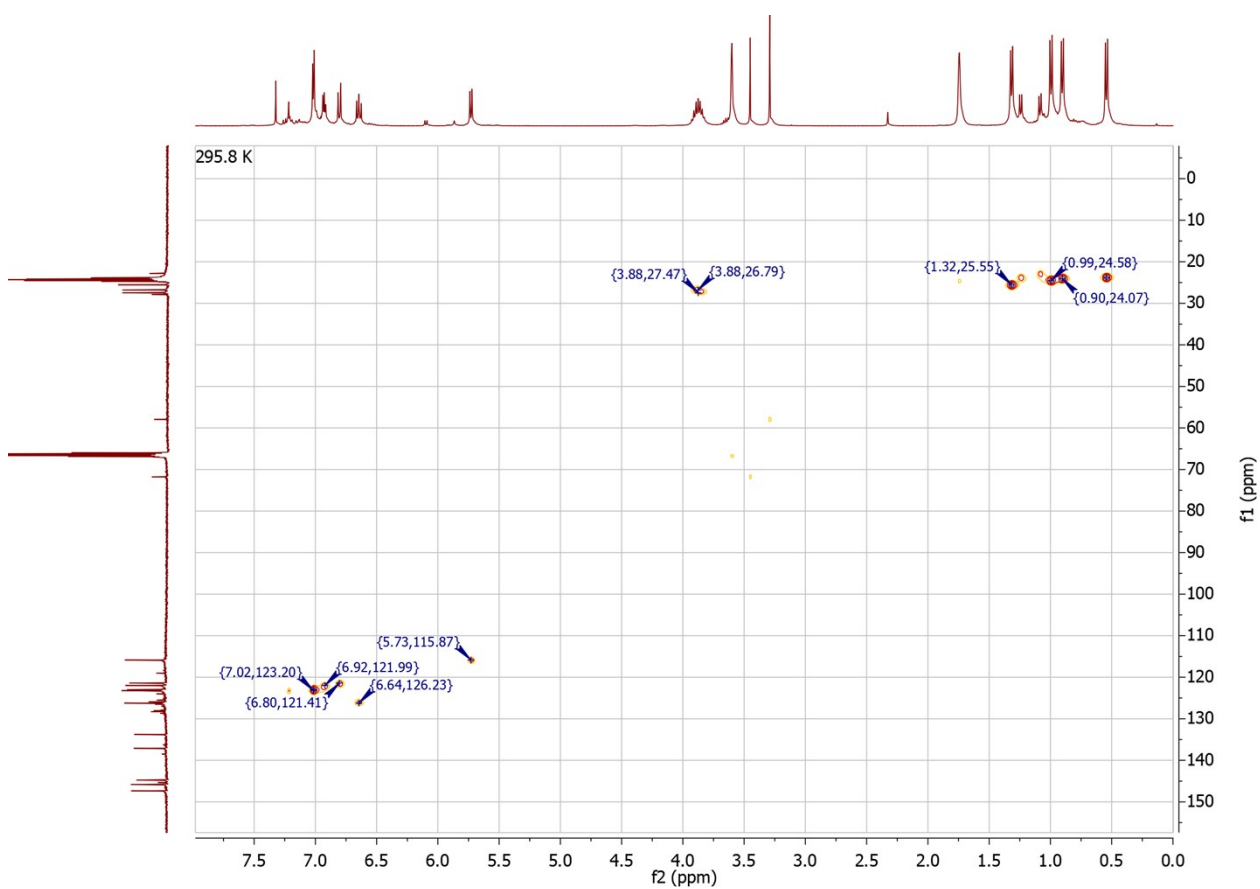

Figure S14.  $^1\text{H}$ - $^{13}\text{C}$  HSQC NMR spectrum of **5** at 298 K in  $\text{thf-d}_8$ .

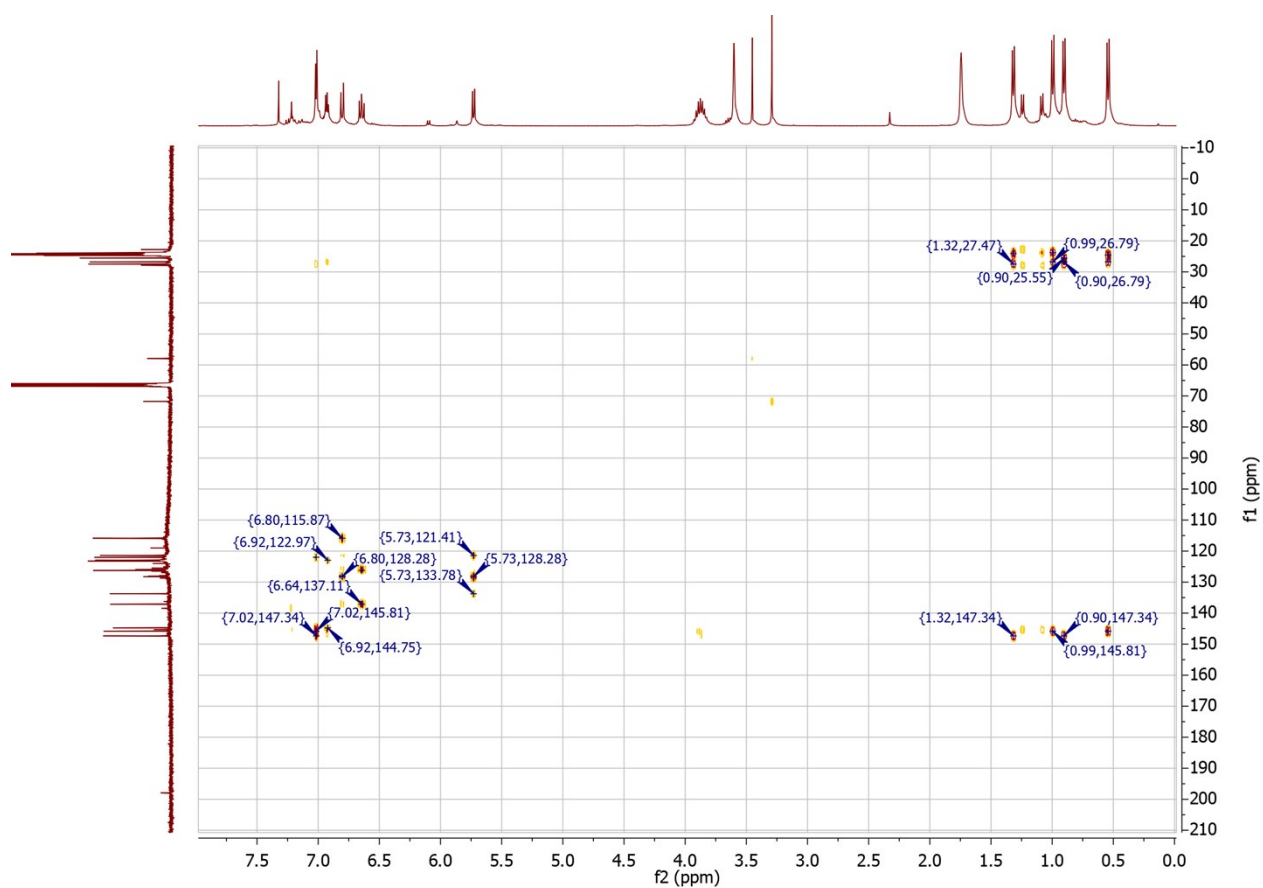

Figure S15.  $^1\text{H}$ - $^{13}\text{C}$  HMBC NMR spectrum of **5** at 298 K in  $\text{thf-d}_8$ .

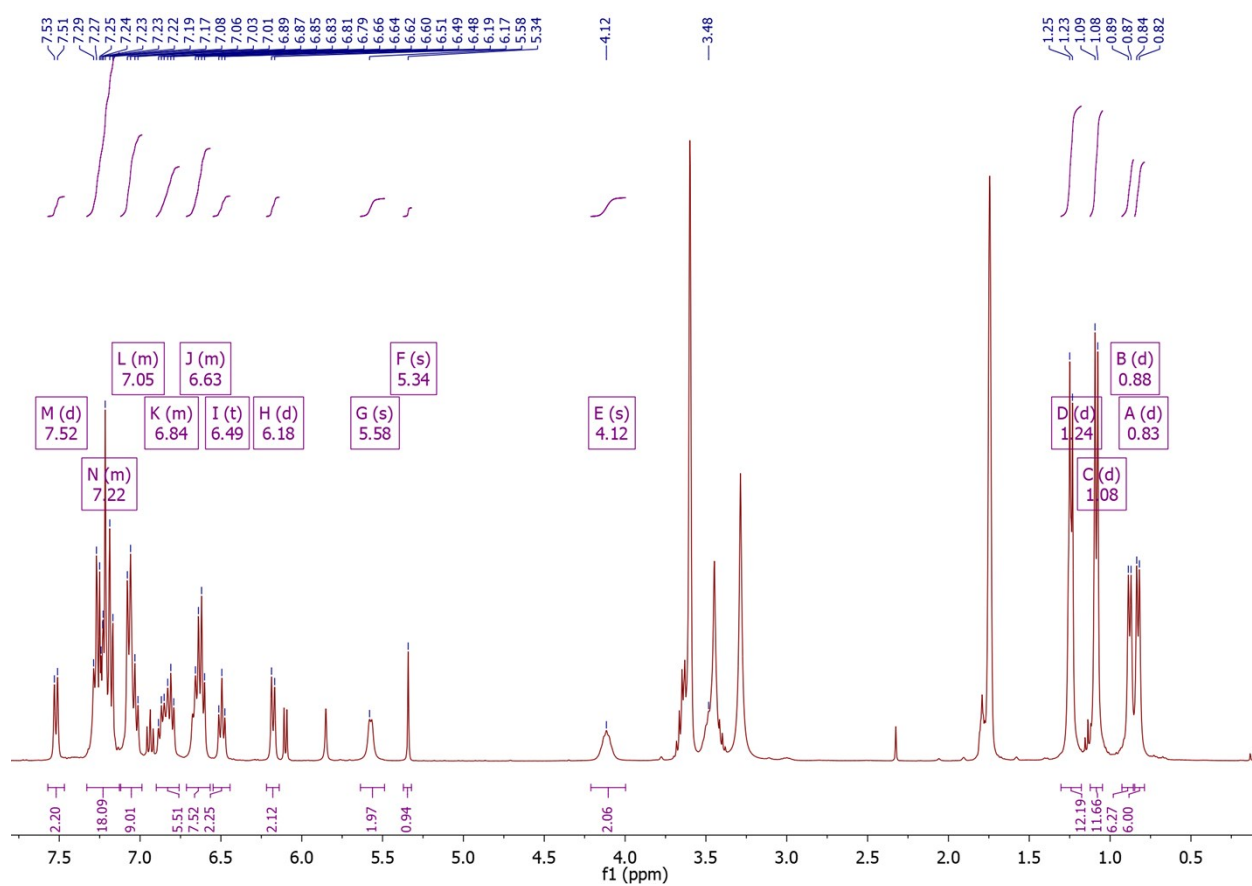

Figure S16.  $^1\text{H}$  NMR spectrum of **6** at 298 K in  $\text{thf-d}_8$ .

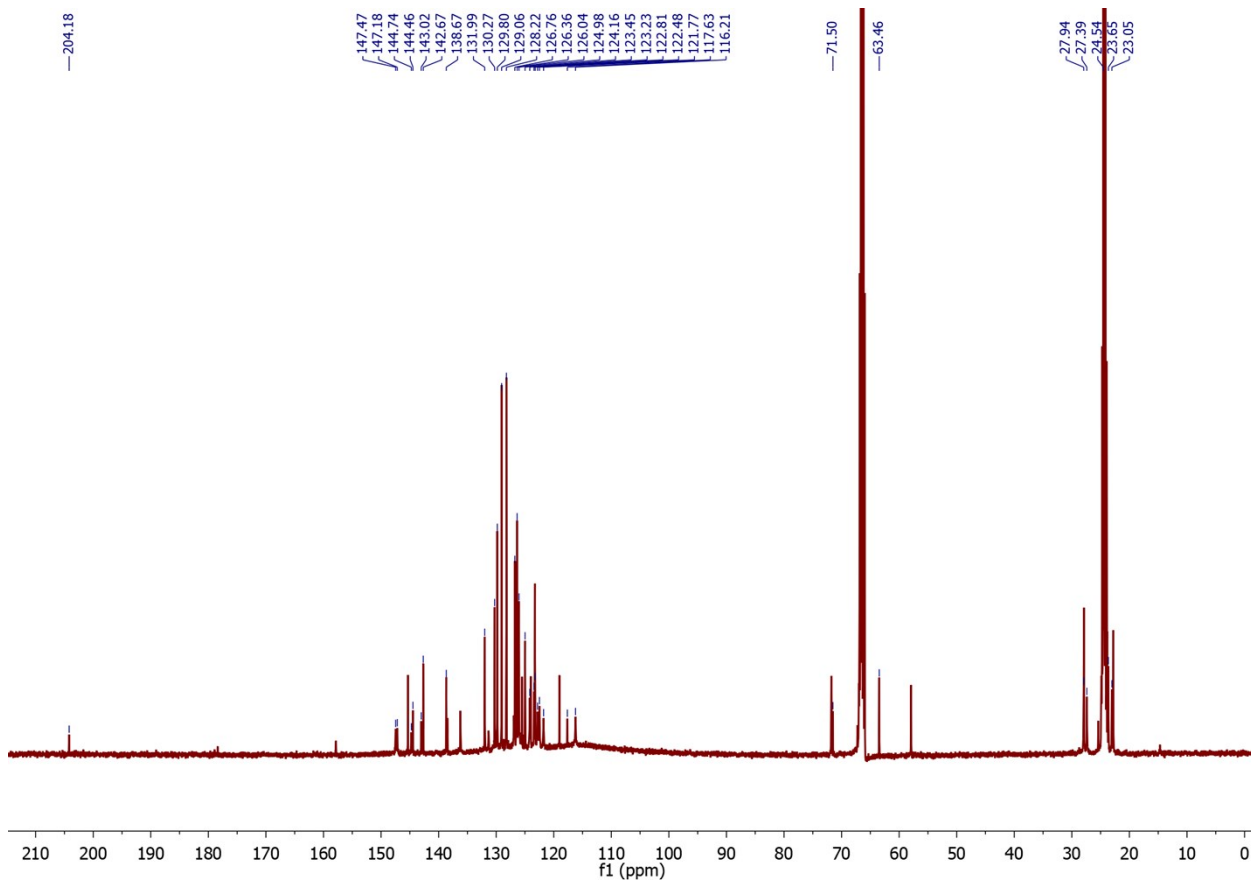

Figure S17.  $^{13}\text{C}$  NMR spectrum of **6** at 298 K in  $\text{thf-d}_8$ .

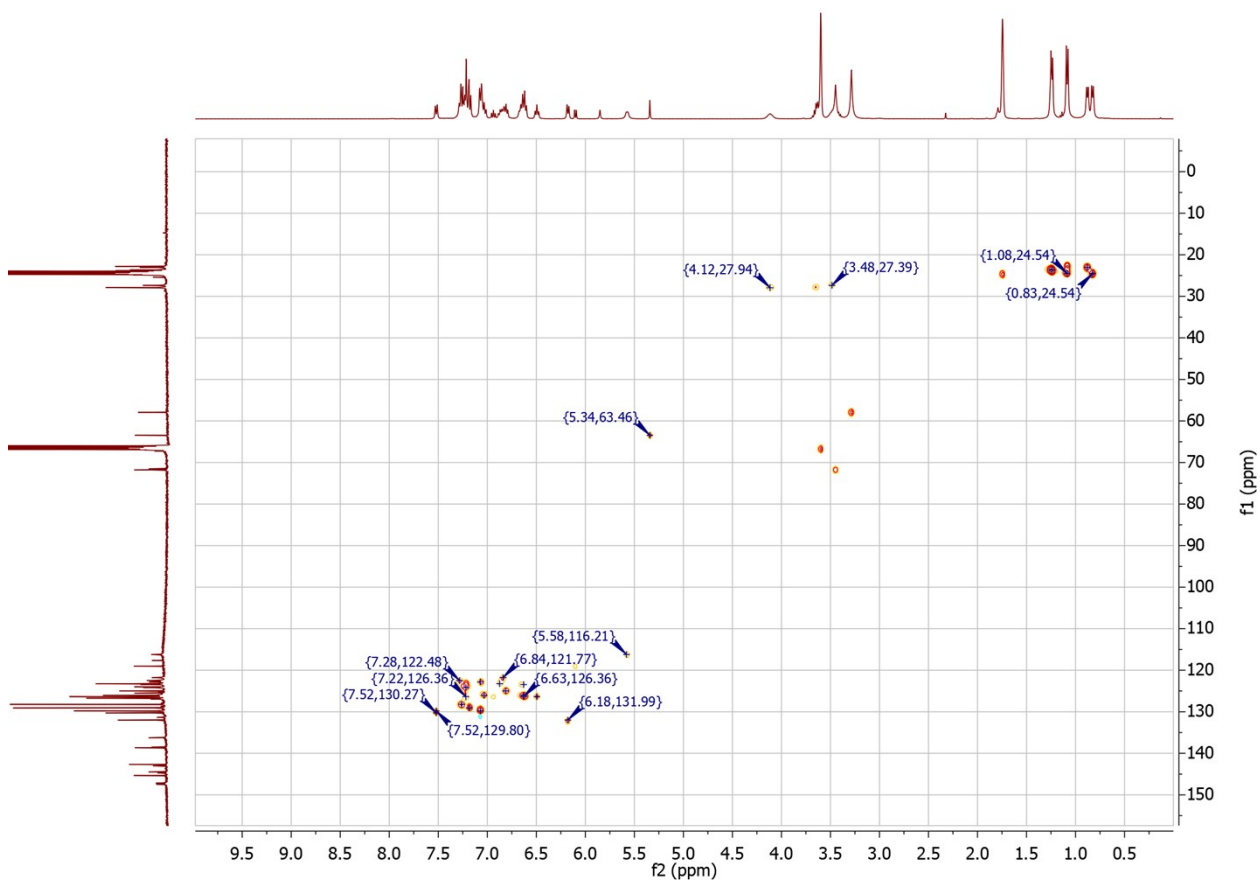

Figure S18.  $^1\text{H}$ - $^{13}\text{C}$  HSQC NMR spectrum of **6** at 298 K in  $\text{thf-d}_8$ .

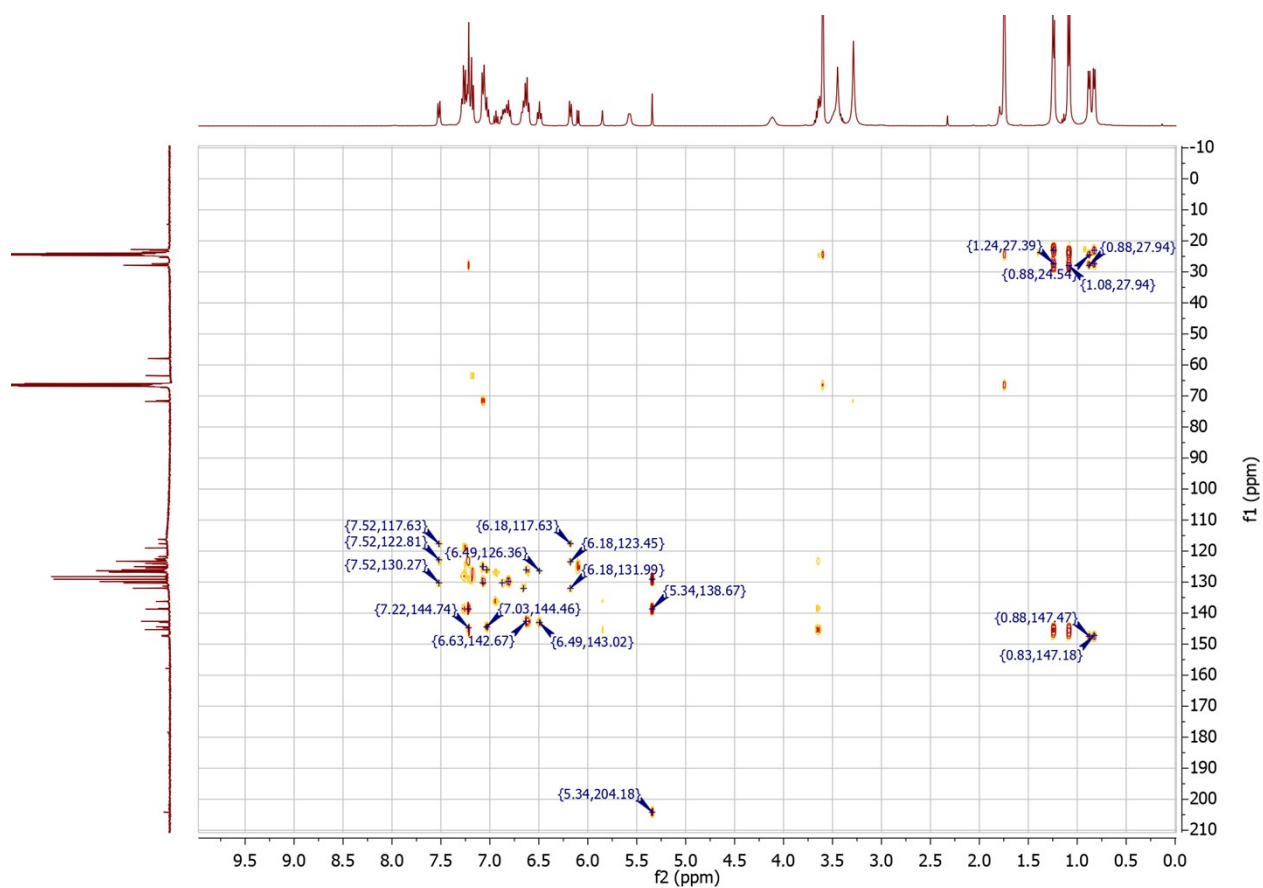

Figure S19.  $^1\text{H}$ - $^{13}\text{C}$  HMBC NMR spectrum of **6** at 298 K in  $\text{thf-d}_8$ .

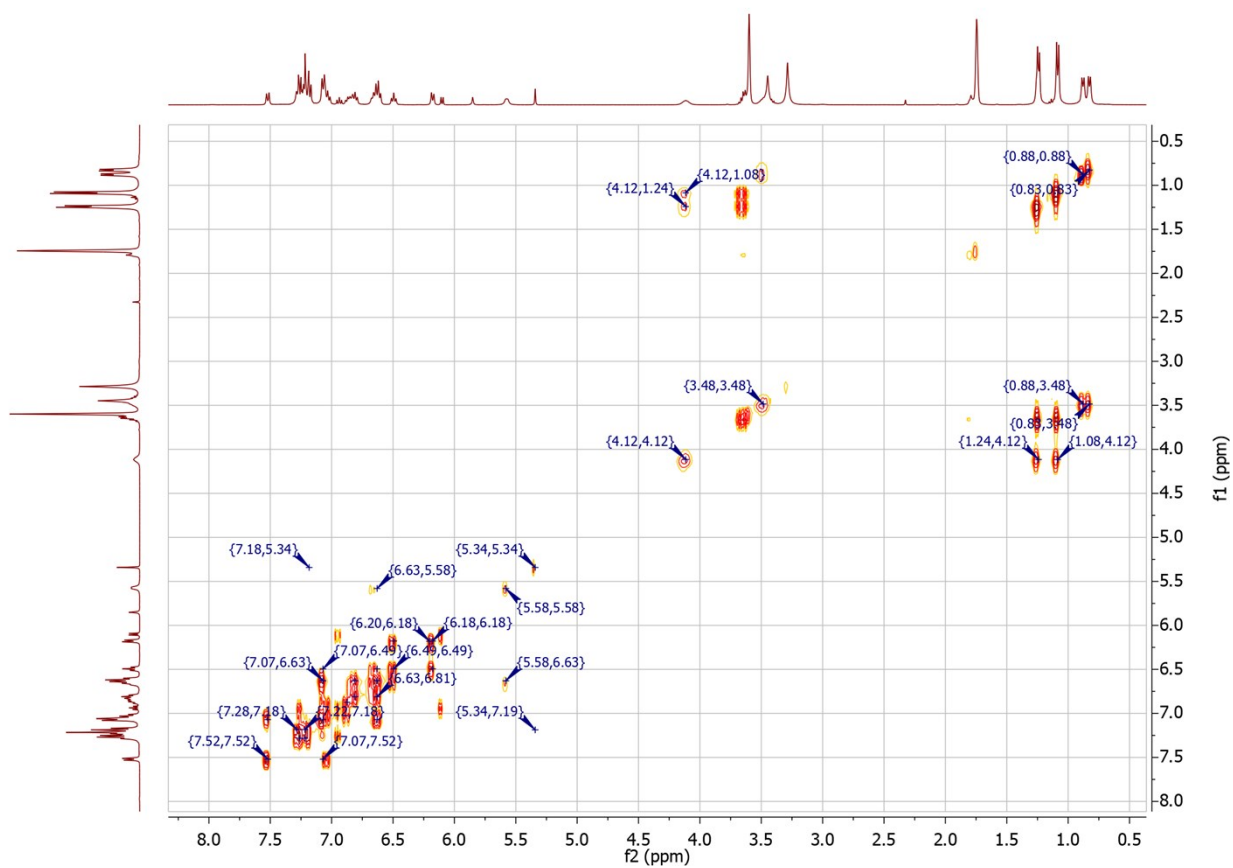

Figure S20.  $^1\text{H}$ - $^1\text{H}$  COSY NMR spectrum of **6** at 298 K in  $\text{thf-d}_8$ .

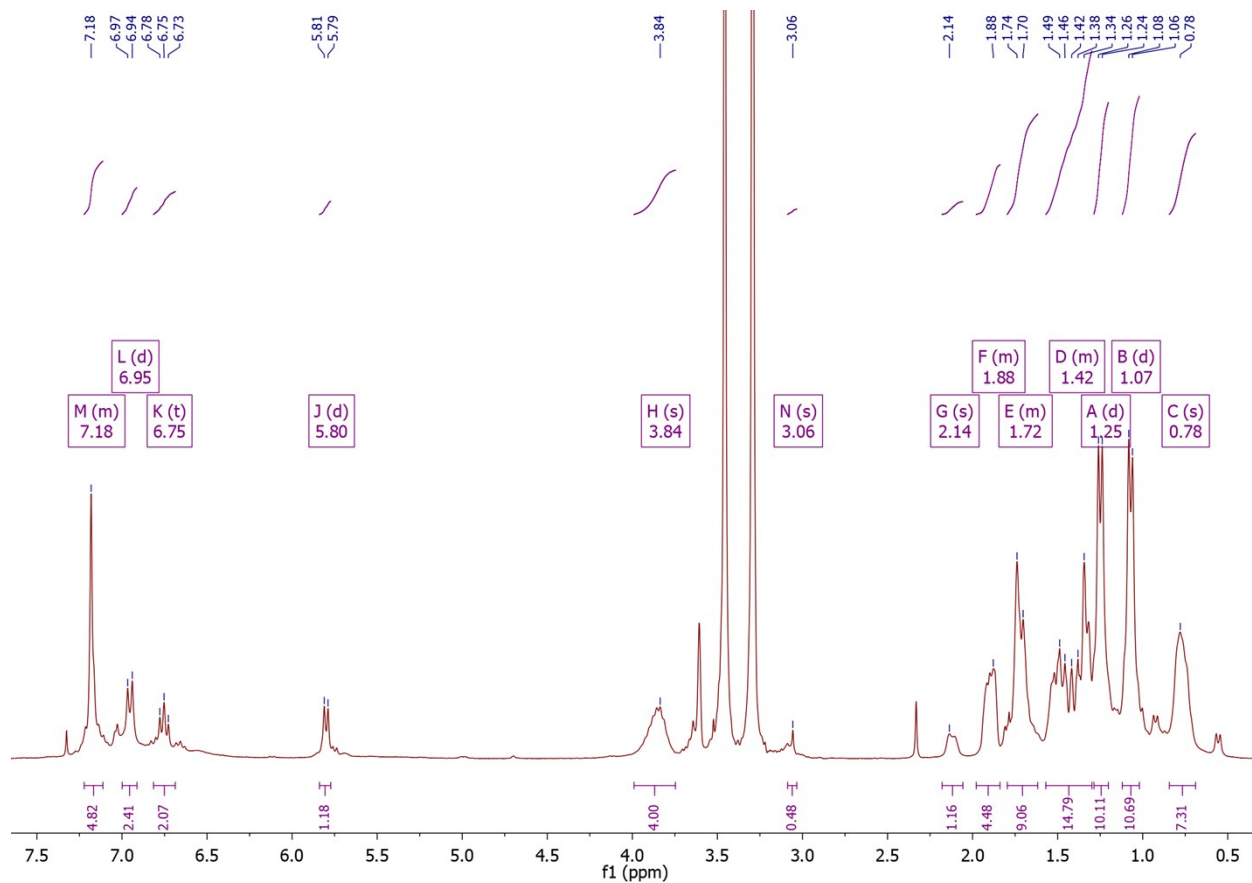

Figure S21.  $^1\text{H}$  NMR spectrum of **7** at 298 K in  $\text{thf-d}_8$ .

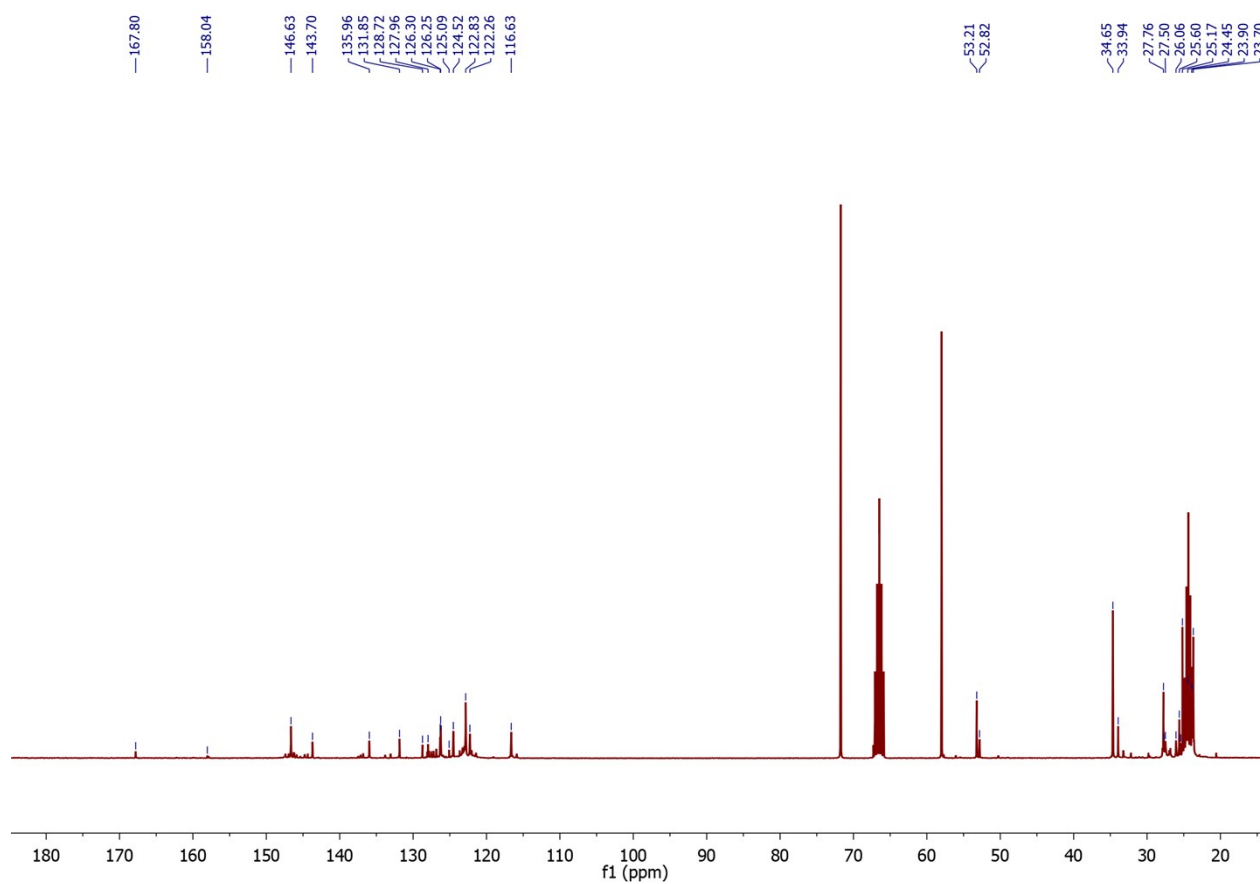

Figure S22.  $^{13}\text{C}$  NMR spectrum of **7** at 298 K in  $\text{thf-d}_8$ .



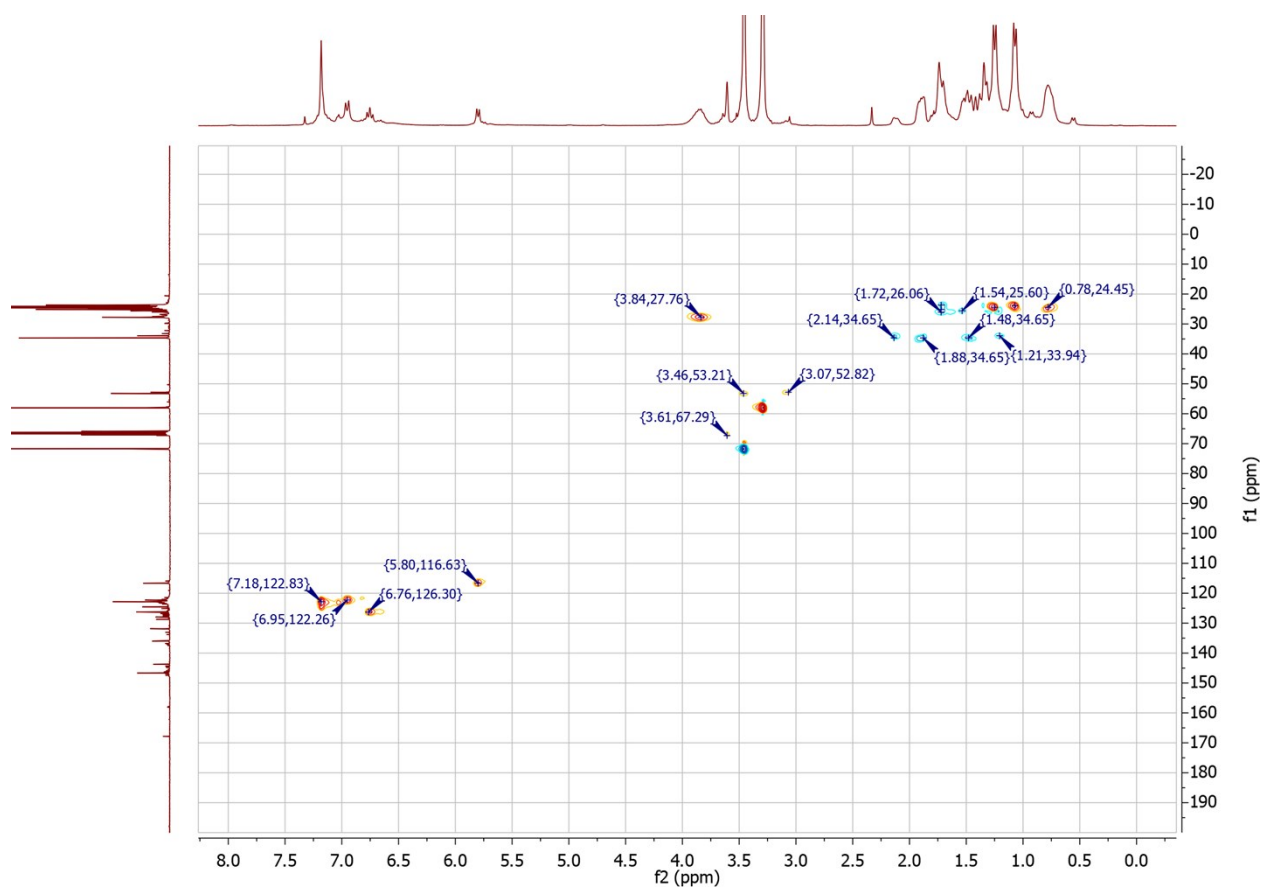

Figure S23.  $^1\text{H}$ - $^{13}\text{C}$  HSQC NMR spectrum of **7** at 298 K in  $\text{thf-d}_8$ .

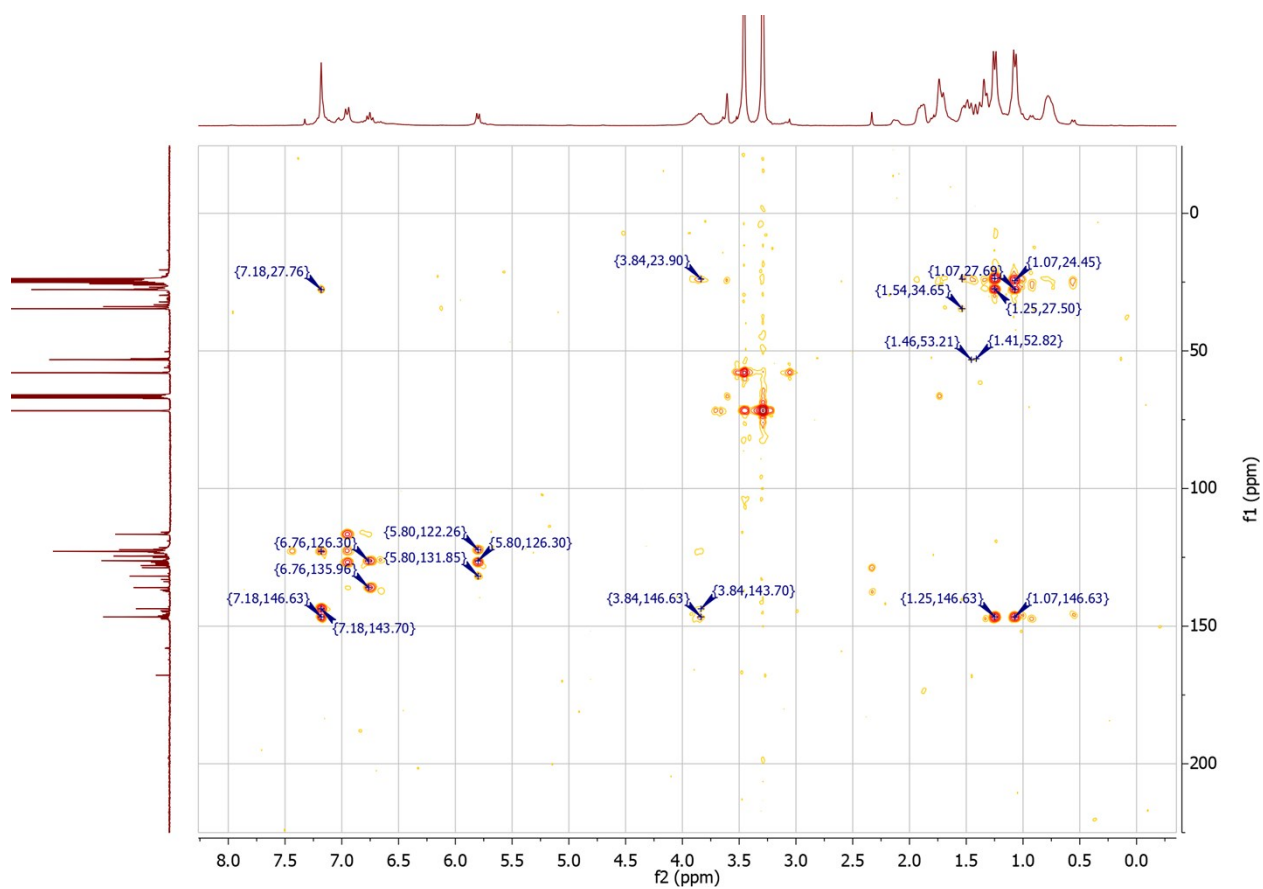

Figure S24.  $^1\text{H}$ - $^{13}\text{C}$  HMBC NMR spectrum of **7** at 298 K in  $\text{thf-d}_8$ .



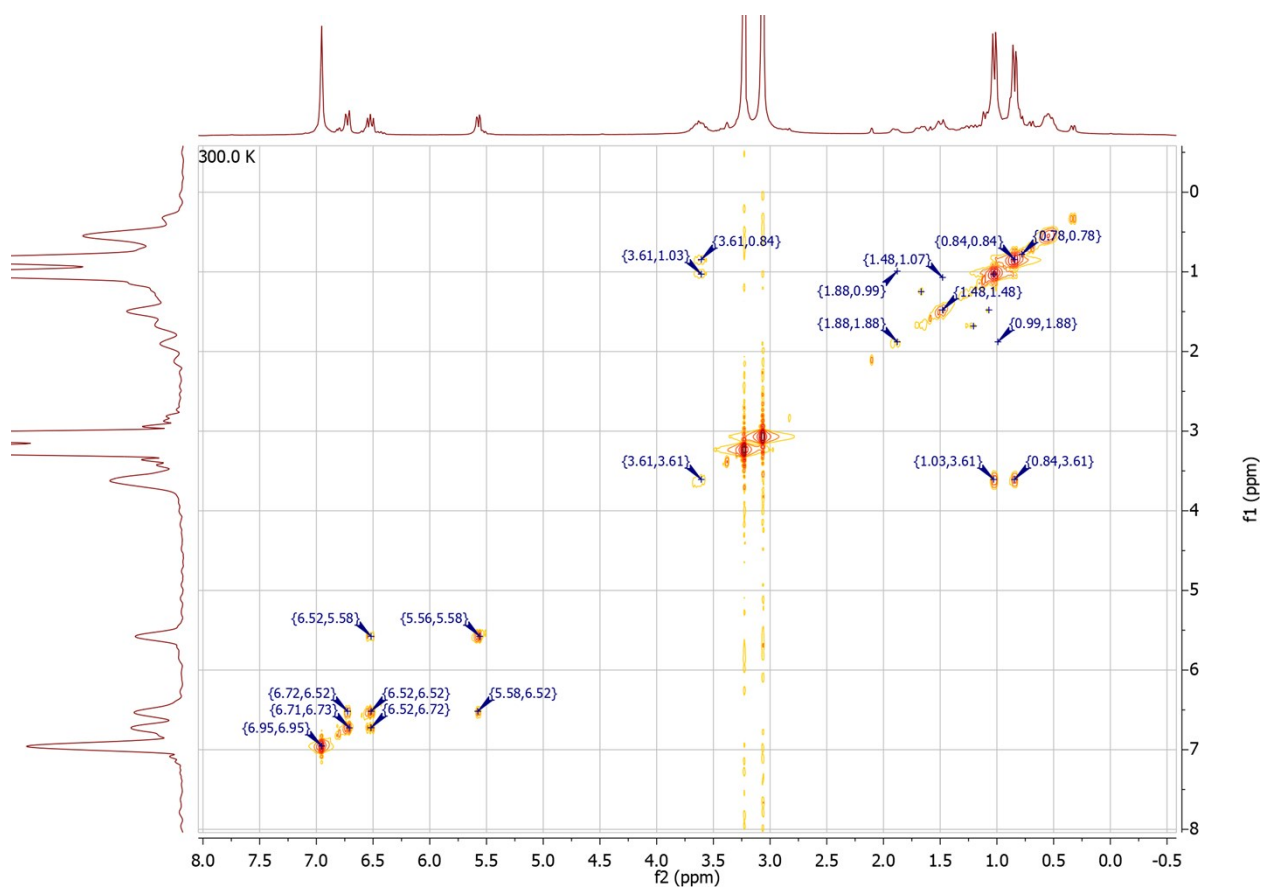

Figure S25.  $^1\text{H}$ - $^1\text{H}$  COSY NMR spectrum of **7** at 298 K in  $\text{thf-d}_8$ .

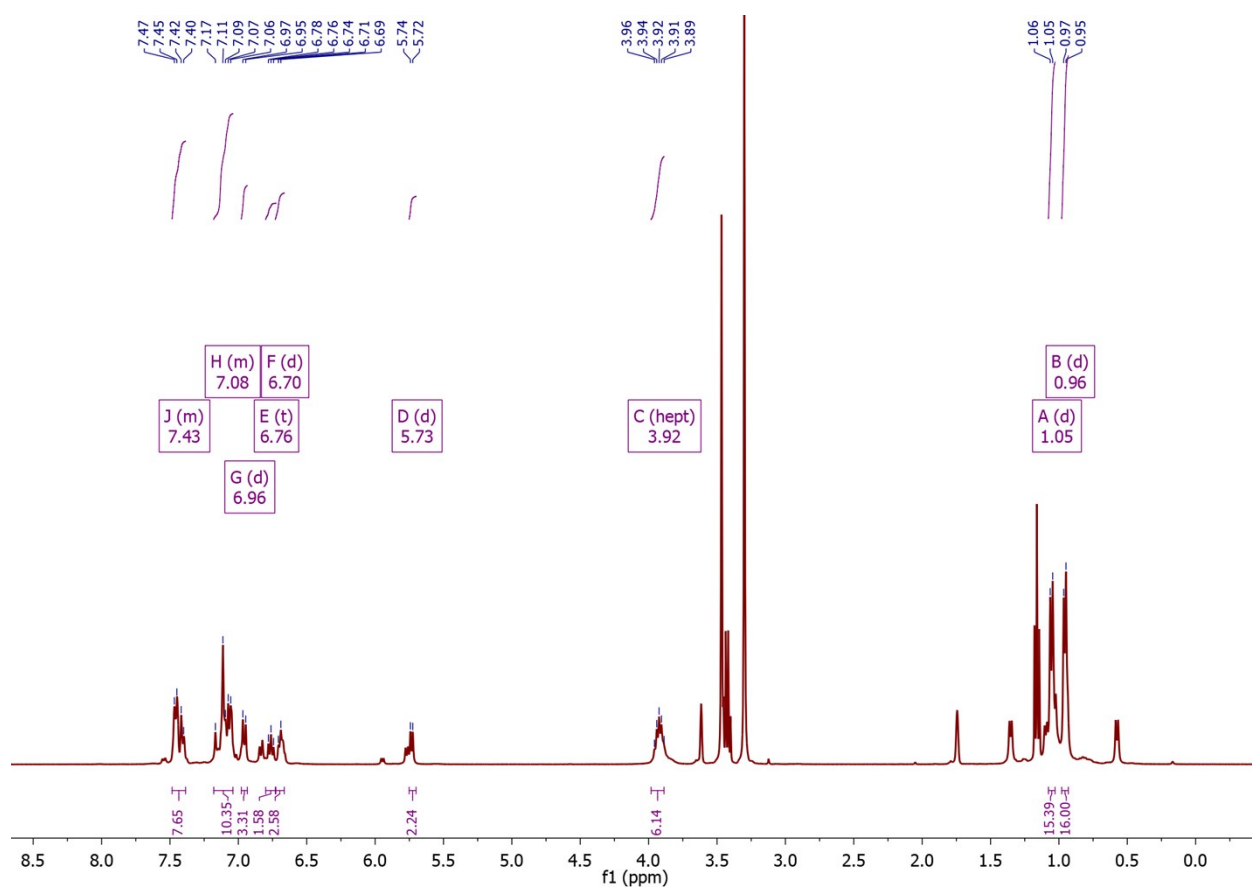

Figure S26.  $^1\text{H}$  NMR spectrum of **8** at 298 K in  $\text{thf-d}_8$ .

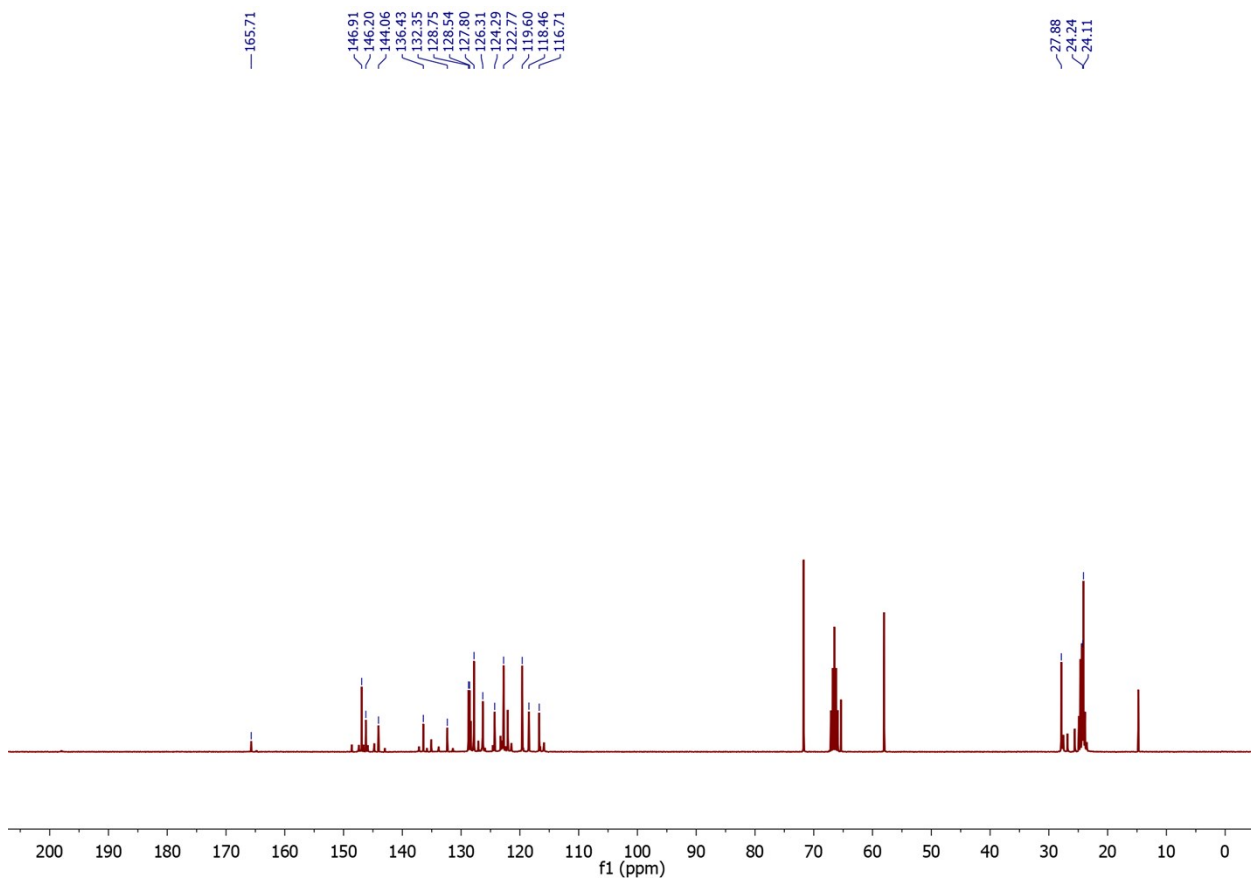

Figure S27.  $^{13}\text{C}$  NMR spectrum of **8** at 298 K in thf- $d_8$ .

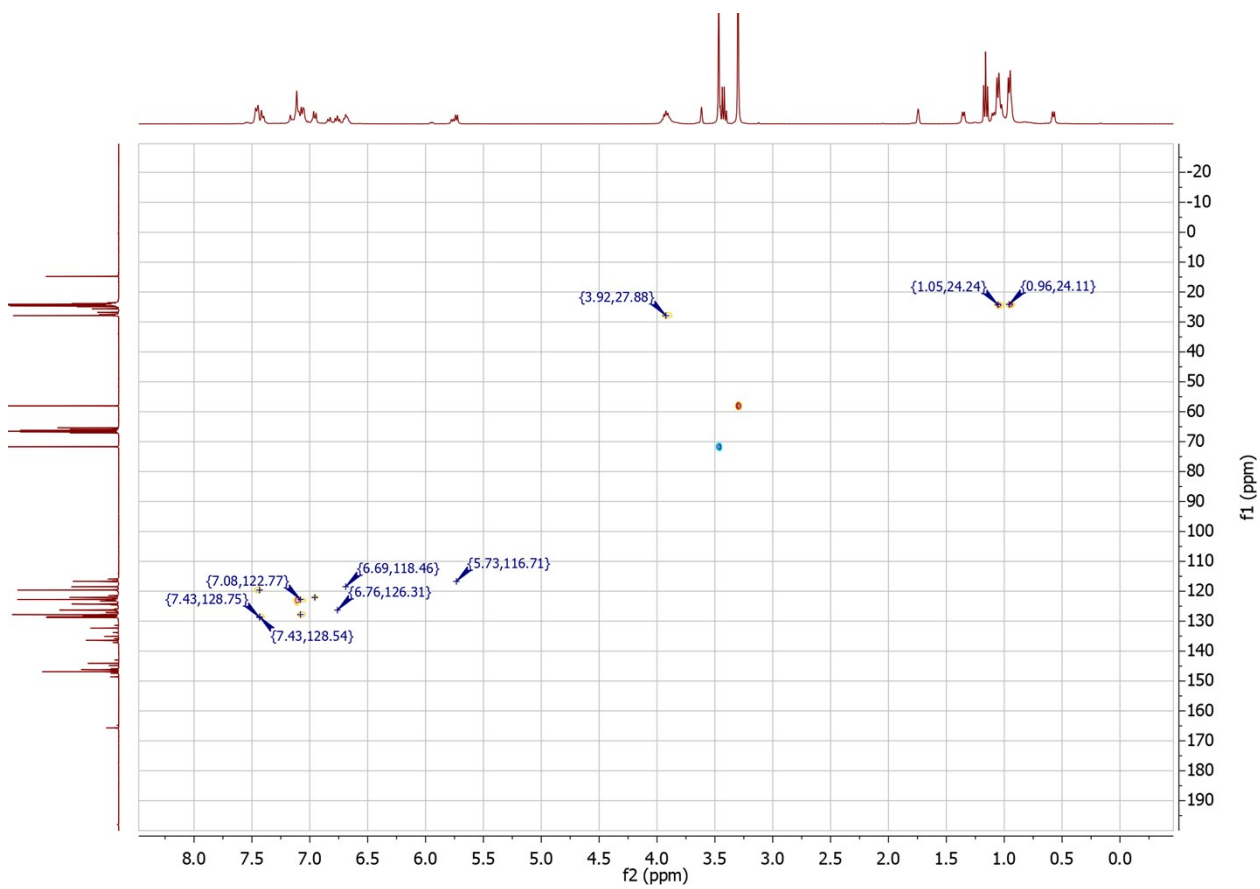

Figure S28.  $^1\text{H}$ - $^{13}\text{C}$  HSQC NMR spectrum of **8** at 298 K in thf- $d_8$ .

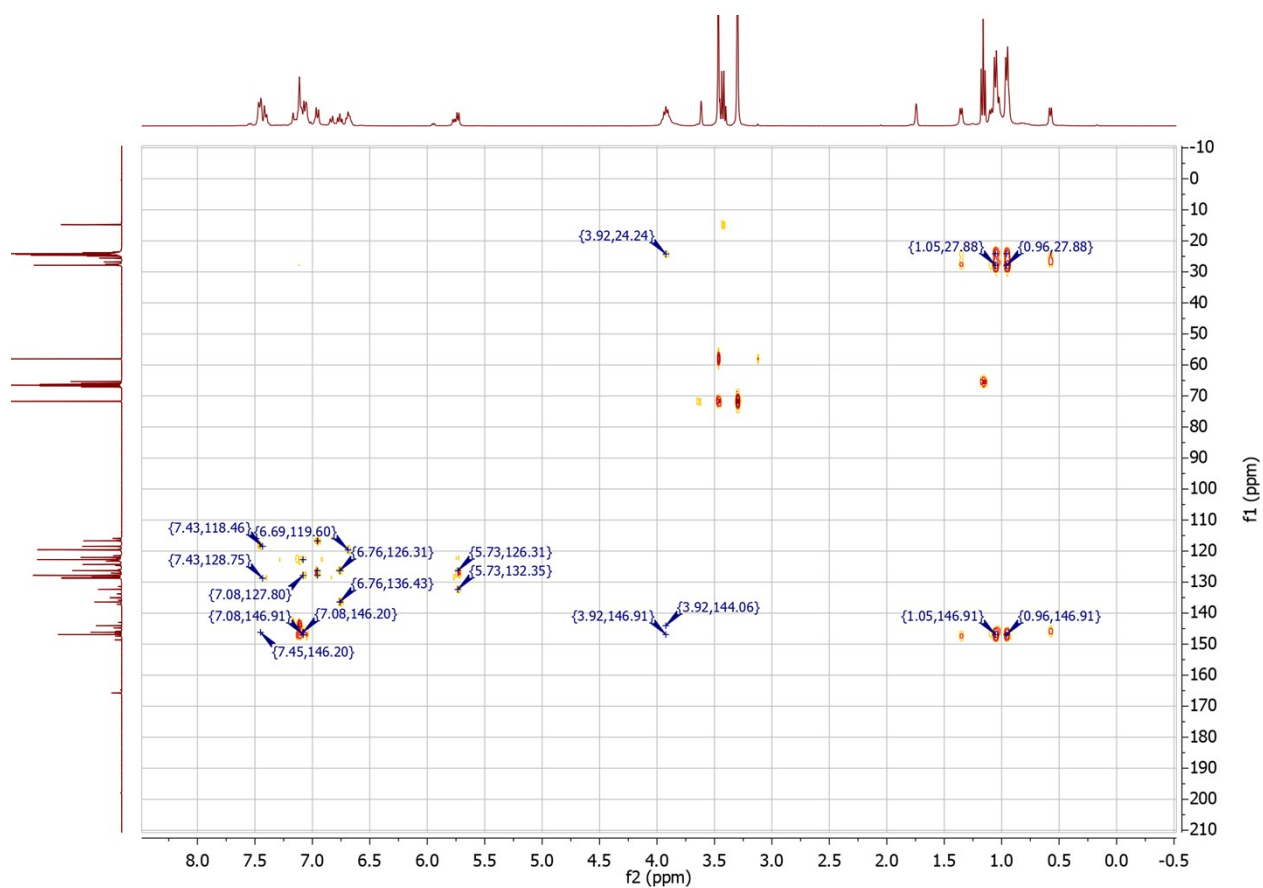

Figure S29.  $^1\text{H}$ - $^{13}\text{C}$  HMBC NMR spectrum of **8** at 298 K in  $\text{thf-d}_8$ .

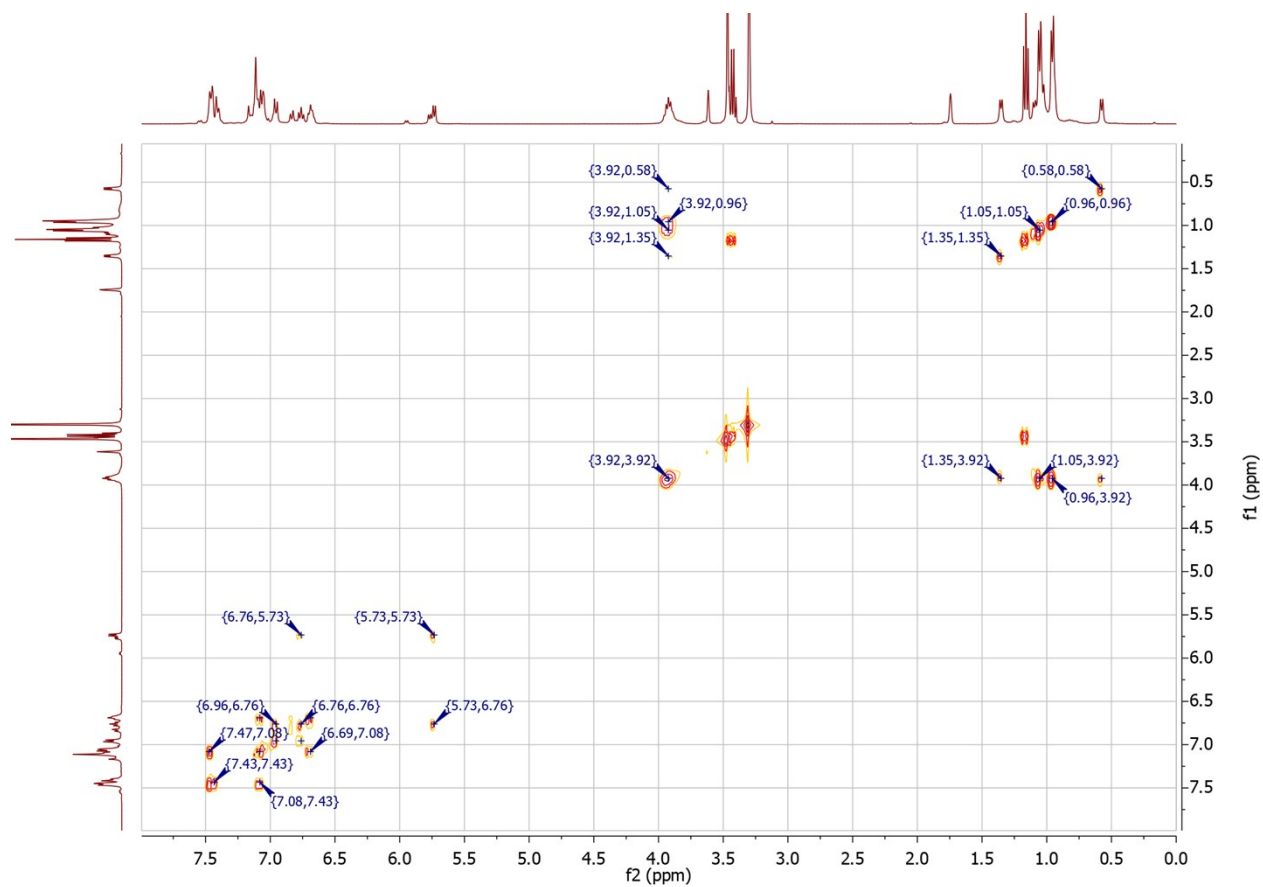

Figure S30.  $^1\text{H}$ - $^1\text{H}$  COSY NMR spectrum of **8** at 298 K in  $\text{thf-d}_8$ .

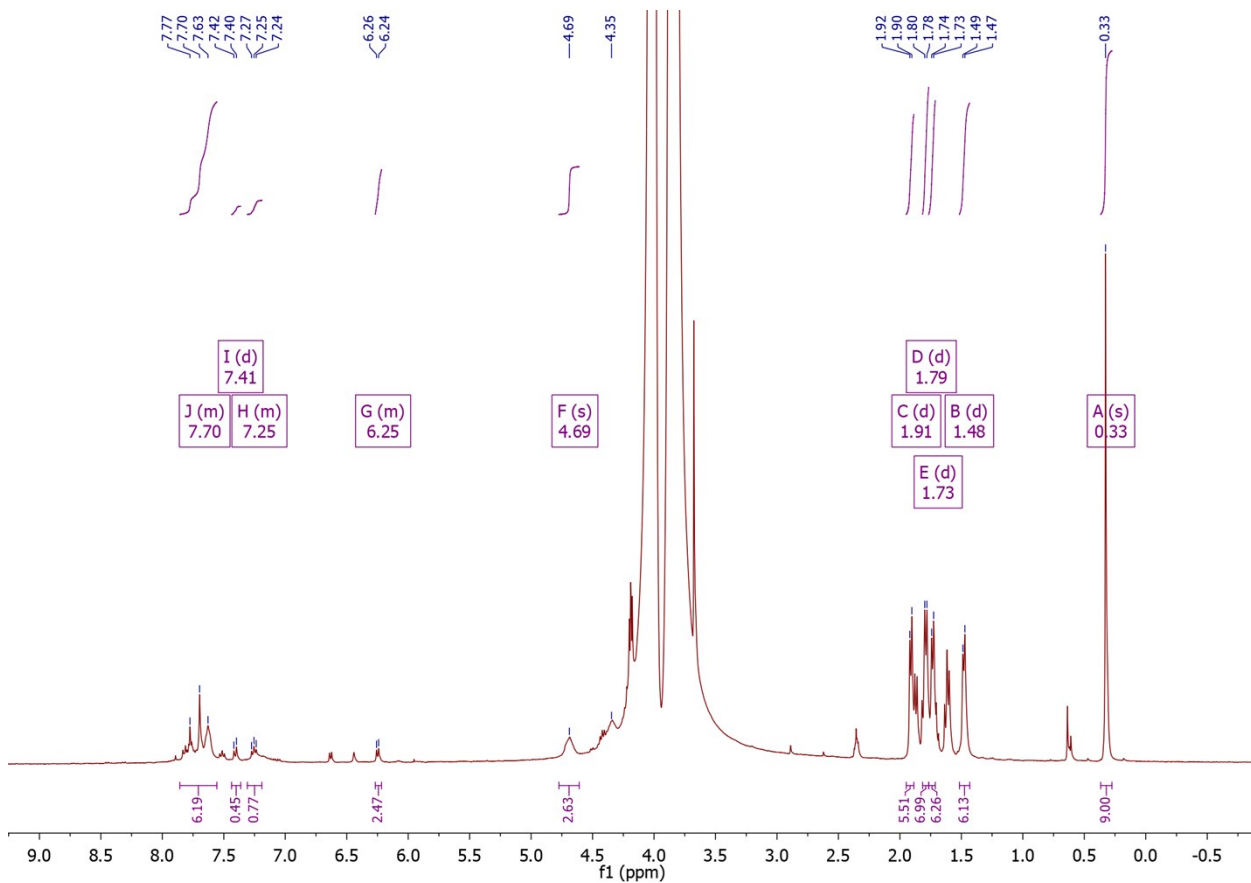

Figure S31.  $^1\text{H}$  NMR spectrum of **10** at 298 K in protio-DME.

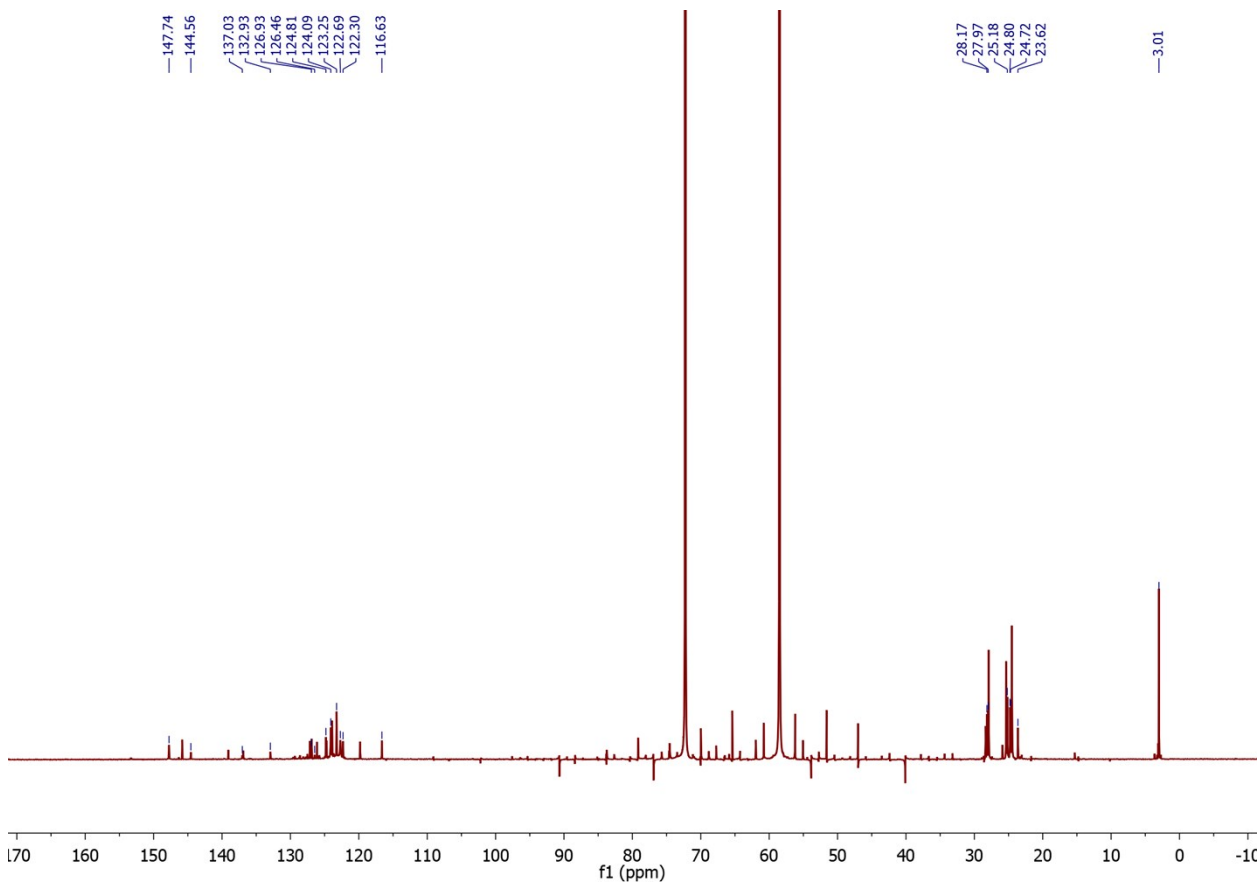

Figure S32.  $^{13}\text{C}$  NMR spectrum of **10** at 298 K in protio-DME.

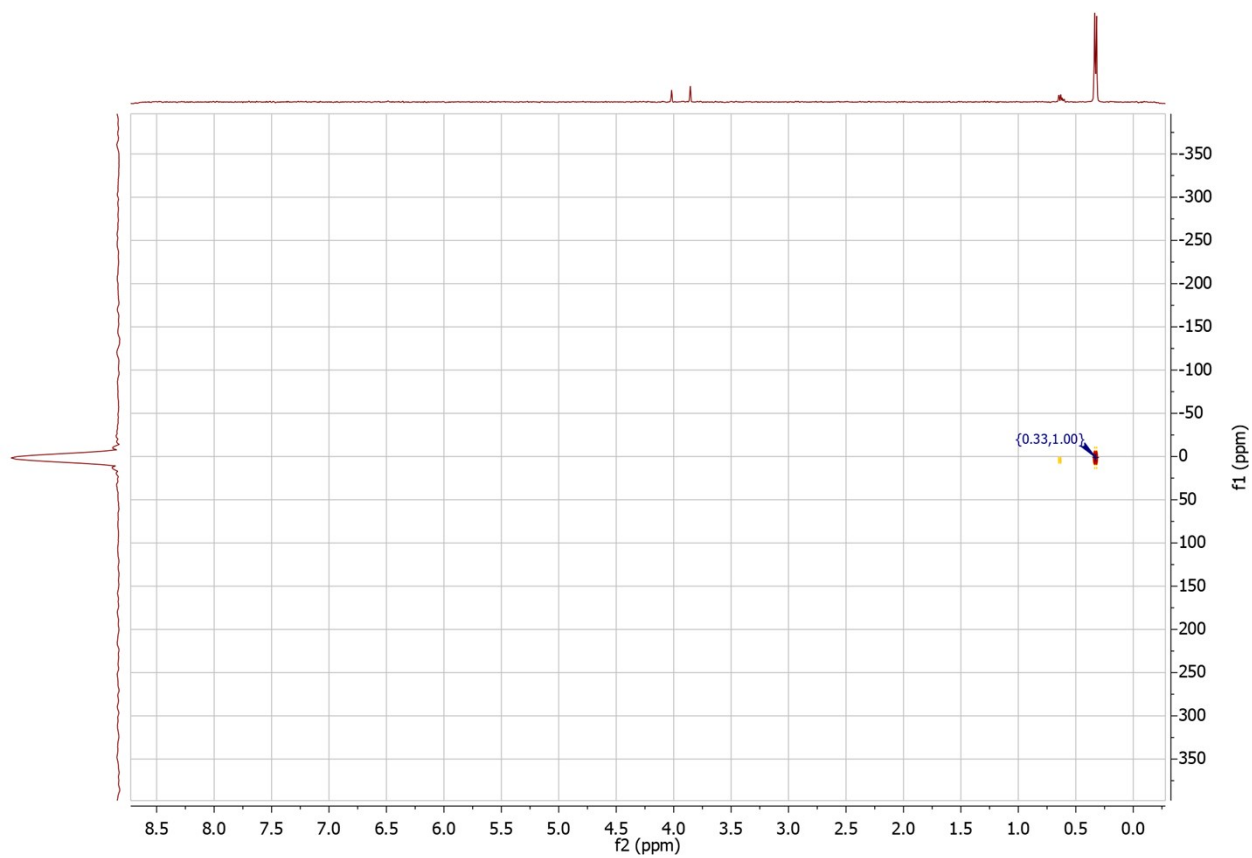

Figure S33.  $^1\text{H}$ - $^{29}\text{Si}$  HMBC NMR spectrum of **10** at 298 K in protio-DME.

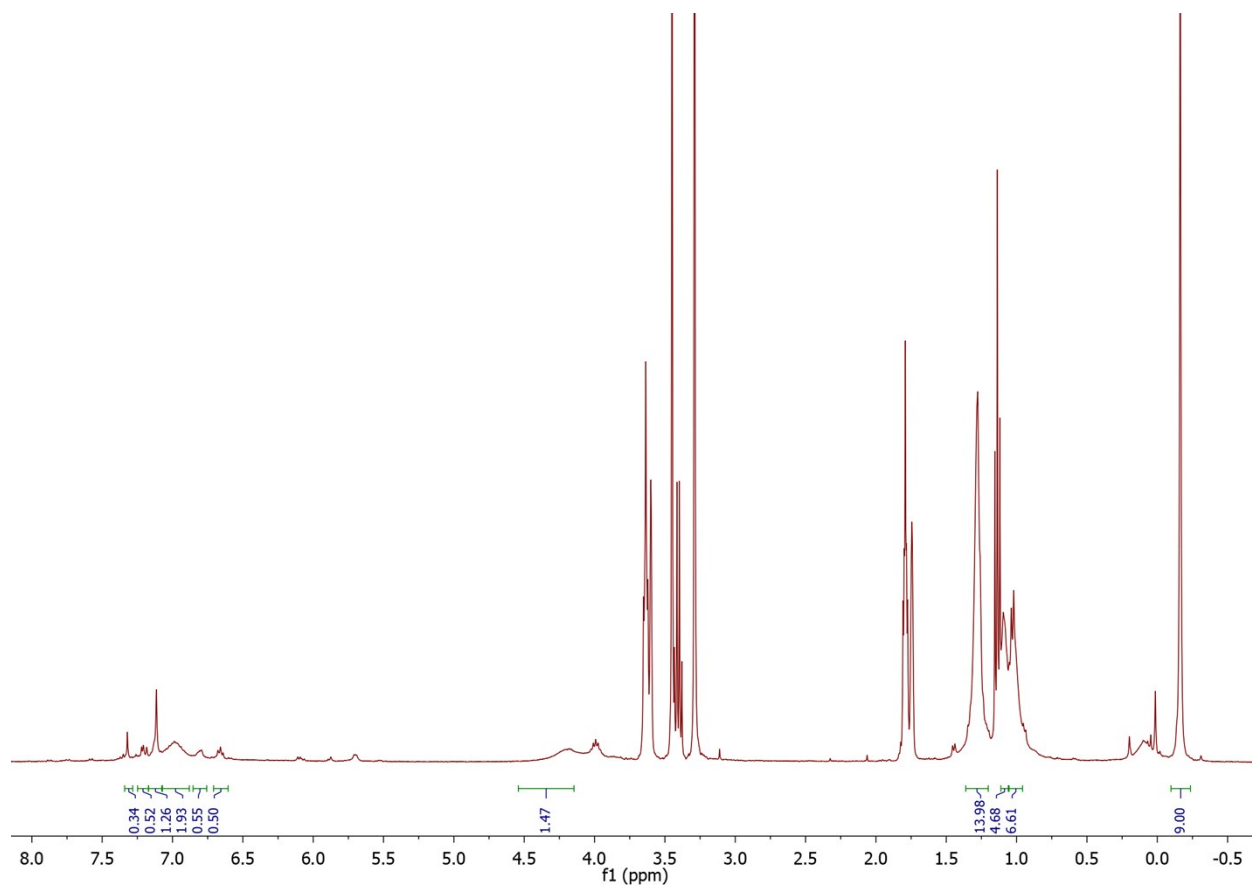

Figure S34.  $^1\text{H}$  NMR spectrum of **11** at 298 K in protio-DME.

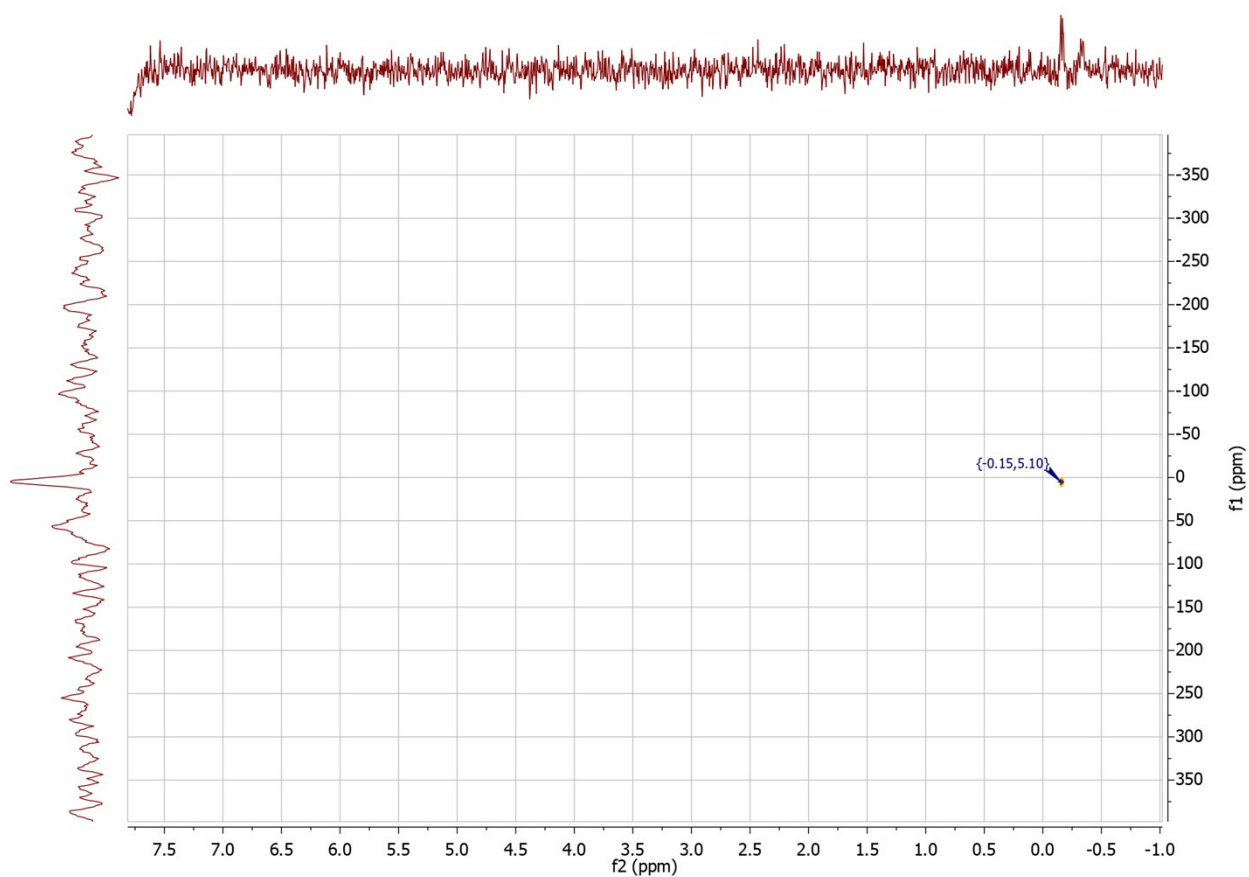

Figure S35.  $^1\text{H}$ - $^{29}\text{Si}$  HMBC NMR spectrum of **11** at 298 K in protio-DME.

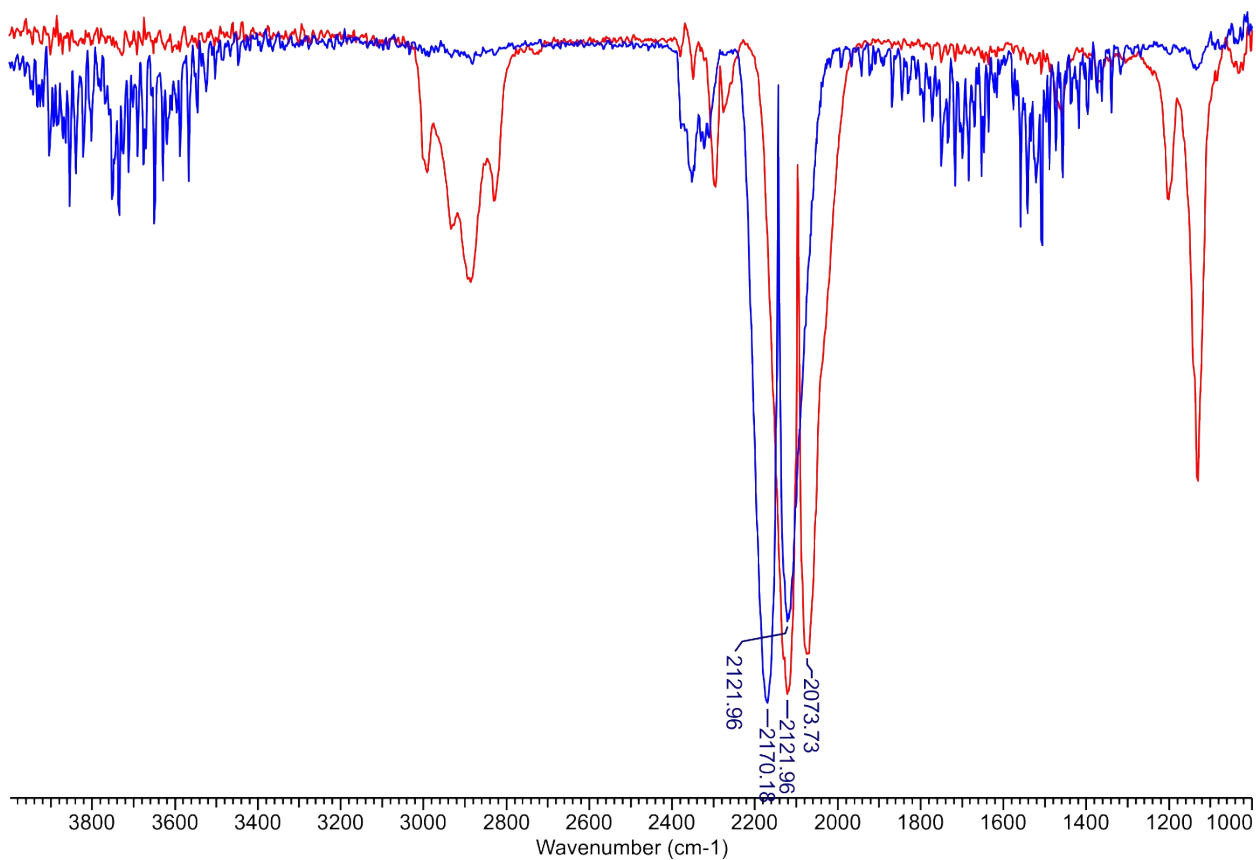

Figure S36. IR spectra of gaseous products of the sequential reaction of **1** with  $^{12}\text{CO}_2$  and 2 eq. of  $\text{Ph}_2\text{C}^{12}\text{CO}$  (blue) and **1** with  $^{13}\text{CO}_2$  and 2 eq. of  $\text{Ph}_2\text{C}^{12}\text{CO}$  (red).

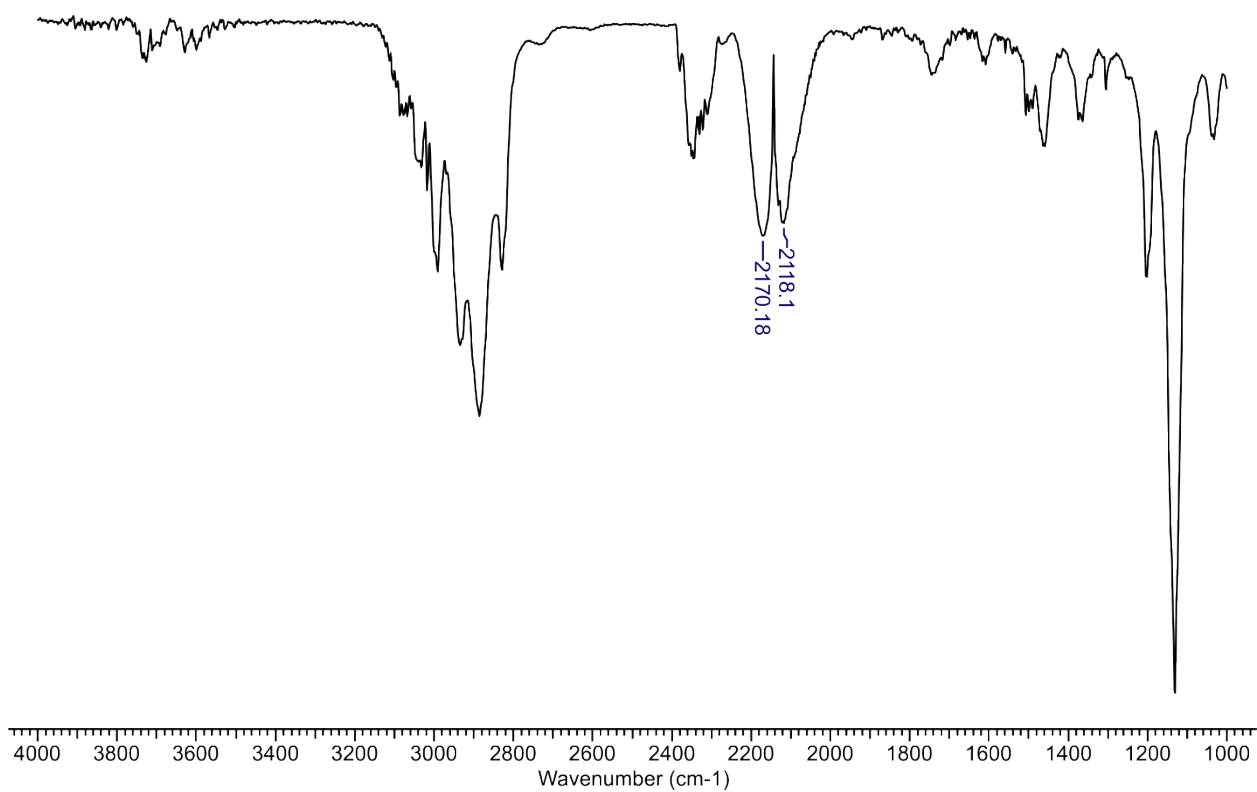

Figure S37. IR spectra of gaseous products of the sequential reaction of **1** with CO<sub>2</sub> and PhNCO.

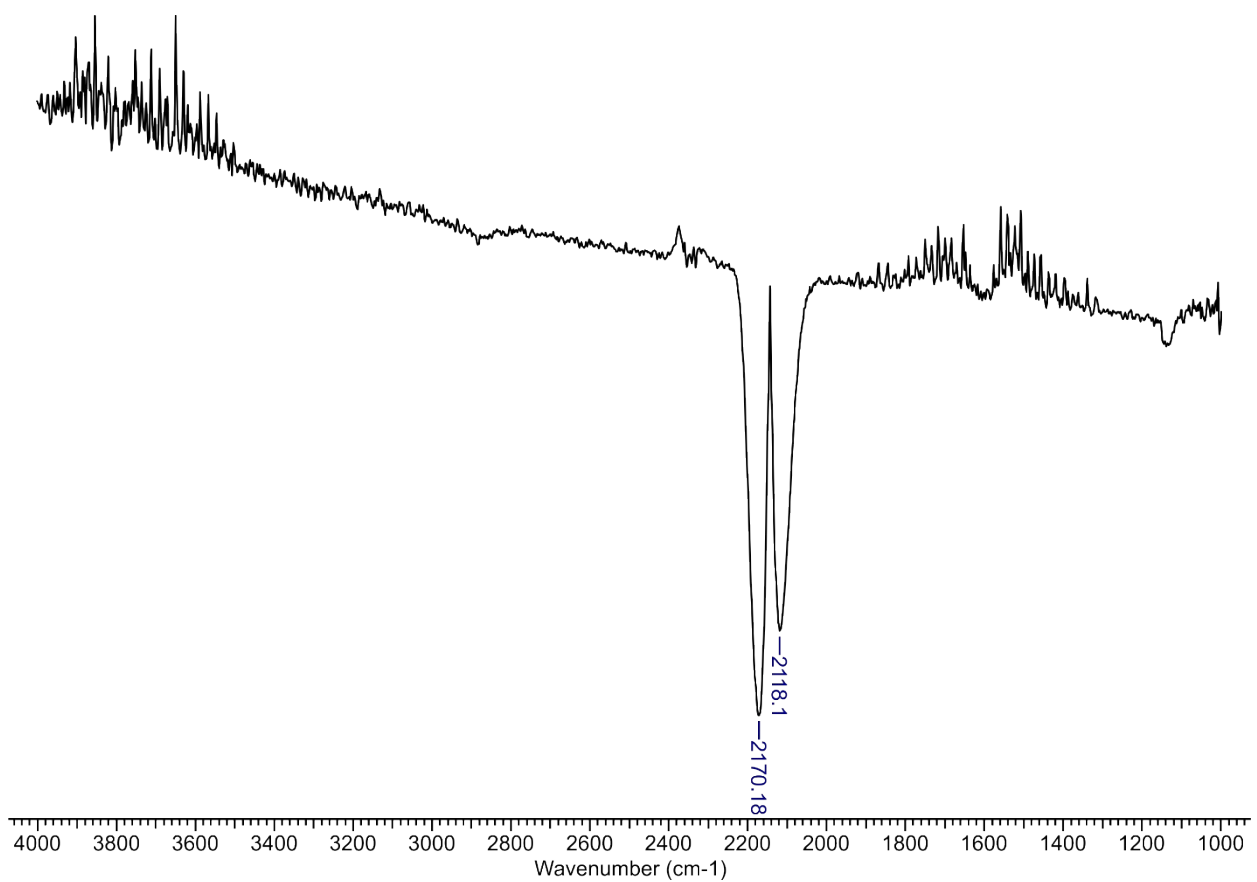

Figure S38. IR spectra of gaseous products of the sequential reaction of **1** with CO<sub>2</sub> and TMSN<sub>3</sub>.

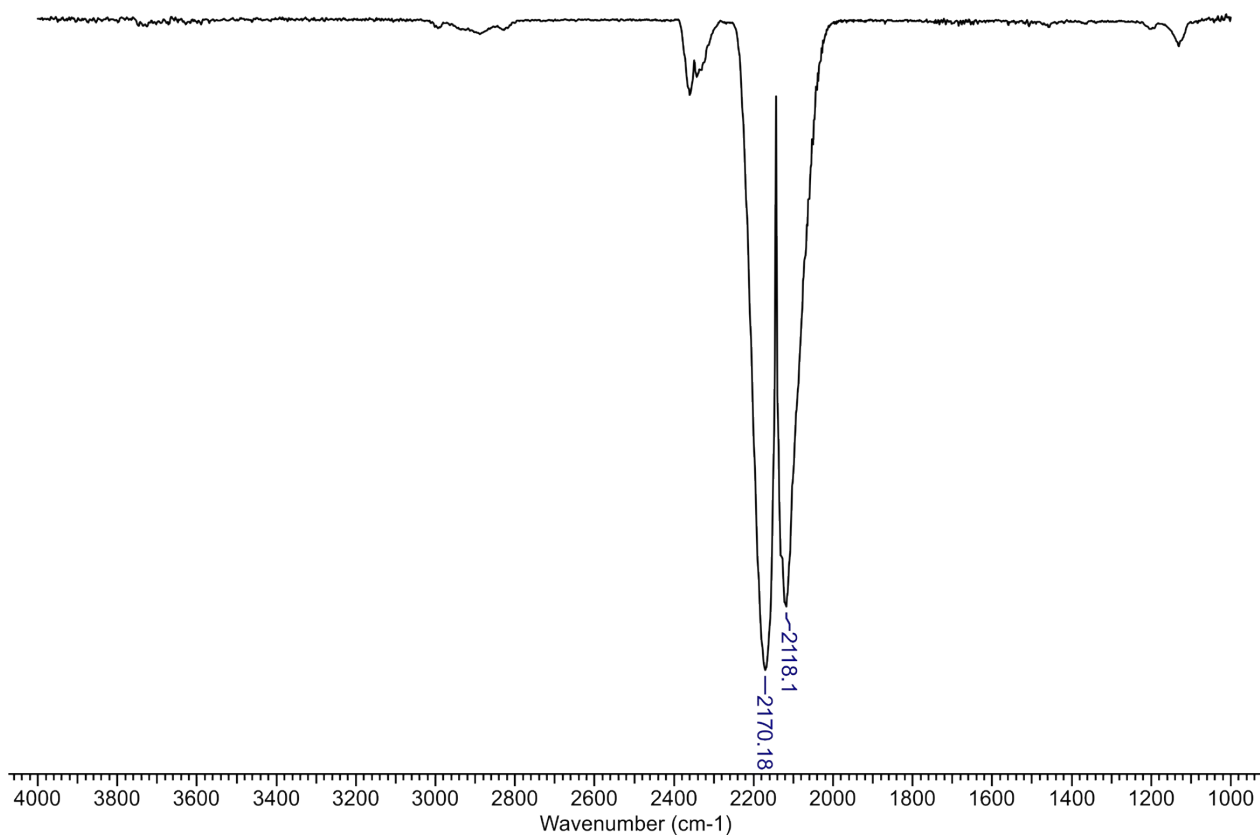

Figure S39. IR spectra of gaseous products of the sequential reaction of **1** with CO<sub>2</sub> and TMSCl.



**X-ray Crystal Structure Determination.** The X-ray diffraction data were collected on an Agilent Xcalibur E (**2, 3, 5**) and a Bruker D8 Quest (**4, 6-11**) diffractometers (Mo-K $\alpha$  radiation,  $\lambda = 0.71073 \text{ \AA}$   $T = 100 \text{ K}$  (**2-7, 9-11**) and  $150 \text{ K}$  (**8**)) then integrated using the CrysAlisPro<sup>6</sup> and SAINT<sup>7</sup> software respectively. Collected diffraction data for **7** at the Bruker D8 Quest were treated with the CrysAlisPro<sup>6</sup> software. The SCALE3 ABSPACK<sup>8</sup> (for **2, 3, 5, 7**) and SADABS<sup>9</sup> (for **4, 6, 8-11**) were used for absorption corrections. All structures were solved by dual-space method using the SHELXT<sup>10</sup> software and refined on  $F^2_{\text{hkl}}$  using SHELXL<sup>11</sup> package. Non-hydrogen atoms were refined anisotropically. All hydrogen atoms were placed in calculated positions and refined in the «riding model» with  $U_{\text{iso}}(\text{H}) = 1.2U_{\text{eq}}$  ( $U_{\text{iso}}(\text{H}) = 1.5U_{\text{eq}}$  for the hydrogen atoms in CH<sub>3</sub> groups) of their parent atoms. Crystals of **2, 5, 7** and **9** contain solvate molecules of DME (**2, 9**), Et<sub>2</sub>O (**5**) and benzene (**9**) respectively, most of them are disordered at the common and special positions (in **5, 7** and **9**). Solvate molecules of DME in **4**, whose contribution to the final model of **4** was implemented by PLATON/SQUEEZE<sup>12</sup>, were revealed at a ratio of 2.5 to one Ga complex. The main crystallographic data and structure refinement details for **2 - 11** are presented in the Table S1. CCDC 2067914 (**2**), CCDC 2067915 (**3**), CCDC 2067916 (**4**), CCDC 2067917 (**5**), CCDC 2067918 (**6**), CCDC 2067919 (**7**), CCDC 2067920 (**8**), CCDC 2067921 (**9**), CCDC 2067922 (**10**) and CCDC 2067923 (**11**) contain the supplementary crystallographic data for this paper. These data can be obtained free of charge via [ccdc.cam.ac.uk/s](http://ccdc.cam.ac.uk/s).

Table S1. Crystal data and structure refinement details for compounds **2–11**.

| Compound                                     | <b>2</b>                                             | <b>3</b>                                             | <b>4</b>                                             | <b>5</b>                                             | <b>6</b>                                             | <b>7</b>                                             |
|----------------------------------------------|------------------------------------------------------|------------------------------------------------------|------------------------------------------------------|------------------------------------------------------|------------------------------------------------------|------------------------------------------------------|
| formula                                      | $C_{93.2}H_{128}Ga_2N_4Na_2O_{13.6}$                 | $C_{86}H_{110}Ga_2N_4Na_2O_{10}$                     | $C_{98}H_{128}Ga_2N_4Na_2O_{16}$                     | $C_{97}H_{130}Ga_2N_4Na_2O_{10}$                     | $C_{72}H_{80}GaN_2NaO_7$                             | $C_{118}H_{169}Ga_2N_8Na_2O_{12.67}$                 |
| $M_r$ [g mol <sup>-1</sup> ]                 | 1707.41                                              | 1545.19                                              | 1803.46                                              | 1697.46                                              | 1178.09                                              | 2087.74                                              |
| crystal system                               | Monoclinic                                           | Triclinic                                            | Triclinic                                            | Monoclinic                                           | Monoclinic                                           | Triclinic                                            |
| space group                                  | $P2_1/n$                                             | $P-1$                                                | $P-1$                                                | $Cc$                                                 | $C2$                                                 | $P-1$                                                |
| $a$ [Å]                                      | 13.6659(4)                                           | 12.9409(5)                                           | 13.9328(8)                                           | 20.7044(13)                                          | 23.891(3)                                            | 12.93764(19)                                         |
| $b$ [Å]                                      | 15.7097(4)                                           | 13.1598(4)                                           | 14.1924(8)                                           | 15.9646(10)                                          | 13.2144(14)                                          | 20.7157(3)                                           |
| $c$ [Å]                                      | 21.6265(6)                                           | 14.4219(7)                                           | 15.9393(9)                                           | 28.8066(13)                                          | 21.639(2)                                            | 44.2008(9)                                           |
| $\alpha$ [°]                                 | 90                                                   | 67.419(4)                                            | 93.983(2)                                            | 90                                                   | 90                                                   | 92.1513(15)                                          |
| $\beta$ [°]                                  | 100.458(3)                                           | 86.425(4)                                            | 113.353(2)                                           | 100.355(5)                                           | 110.724(3)                                           | 95.3102(15)                                          |
| $\gamma$ [°]                                 | 90                                                   | 64.580(3)                                            | 113.780(2)                                           | 90                                                   | 90                                                   | 98.1137(12)                                          |
| $V$ [Å <sup>3</sup> ]                        | 4565.8(2)                                            | 2032.69(16)                                          | 2547.4(3)                                            | 9366.6(9)                                            | 6389.4(12)                                           | 11662.1(4)                                           |
| $Z$                                          | 2                                                    | 1                                                    | 1                                                    | 4                                                    | 4                                                    | 4                                                    |
| $\rho_{calc}$ [g cm <sup>-3</sup> ]          | 1.242                                                | 1.262                                                | 1.176                                                | 1.204                                                | 1.225                                                | 1.189                                                |
| $\mu$ [mm <sup>-1</sup> ]                    | 0.662                                                | 0.733                                                | 0.598                                                | 0.642                                                | 0.492                                                | 0.530                                                |
| $F(000)$                                     | 1816                                                 | 818                                                  | 956                                                  | 3616                                                 | 2496                                                 | 4473                                                 |
| crystal size, [mm <sup>3</sup> ]             | 0.35 × 0.30 × 0.05                                   | 0.471 × 0.366 × 0.116                                | 0.195 × 0.181 × 0.073                                | 0.60 × 0.38 × 0.14                                   | 0.34 × 0.19 × 0.16                                   | 0.417 × 0.290 × 0.230                                |
| $\theta_{min}/\theta_{max}$ [°]              | 3.22 / 27.00                                         | 3.07 / 28.00                                         | 2.66 / 27.00                                         | 2.93 / 25.03                                         | 2.19 / 25.00                                         | 1.76 / 28.00                                         |
| index ranges                                 | -17 ≤ $h$ ≤ 17,<br>-20 ≤ $k$ ≤ 20,<br>-20 ≤ $l$ ≤ 27 | -17 ≤ $h$ ≤ 17,<br>-17 ≤ $k$ ≤ 17,<br>-19 ≤ $l$ ≤ 19 | -17 ≤ $h$ ≤ 17,<br>-18 ≤ $k$ ≤ 18,<br>-20 ≤ $l$ ≤ 20 | -24 ≤ $h$ ≤ 24,<br>-18 ≤ $k$ ≤ 12,<br>-24 ≤ $l$ ≤ 34 | -28 ≤ $h$ ≤ 28,<br>-15 ≤ $k$ ≤ 15,<br>-25 ≤ $l$ ≤ 25 | -17 ≤ $h$ ≤ 17,<br>-27 ≤ $k$ ≤ 27,<br>-58 ≤ $l$ ≤ 58 |
| reflections collected                        | 35462                                                | 32646                                                | 32214                                                | 21670                                                | 32140                                                | 177556                                               |
| independent reflections                      | 9946                                                 | 9789                                                 | 11014                                                | 11721                                                | 10631                                                | 56234                                                |
| $R_{int}$                                    | 0.0709                                               | 0.0882                                               | 0.1138                                               | 0.0325                                               | 0.0647                                               | 0.1291                                               |
| max/min transmission                         | 1.000/ 0.552                                         | 0.933/ 0.781                                         | 0.9281/ 0.7248                                       | 0.912/ 0.767                                         | 0.914/ 0.738                                         | 0.917/ 0.871                                         |
| data/restraints/<br>parameters               | 9946 / 0 / 532                                       | 9789 / 0 / 480                                       | 11014 / 30 / 577                                     | 11721 / 1044 / 1174                                  | 10631 / 339 / 822                                    | 56234 / 259 / 2705                                   |
| GOF on $F^2$                                 | 1.005                                                | 1.027                                                | 1.003                                                | 1.017                                                | 1.042                                                | 1.025                                                |
| final $R$ indices [ $I > 2\sigma(I)$ ]       | 0.0570 / 0.1494                                      | 0.0596 / 0.0958                                      | 0.0830 / 0.1630                                      | 0.0671 / 0.1624                                      | 0.1050 / 0.1831                                      | 0.0953 / 0.2546                                      |
| $R$ indices (all data)                       | 0.0904 / 0.1686                                      | 0.1251 / 0.1095                                      | 0.1548 / 0.1811                                      | 0.0900 / 0.1814                                      | 0.1435 / 0.2037                                      | 0.1172 / 0.2805                                      |
| Absolute structure parameter                 | -                                                    | -                                                    | -                                                    | 0.001(6)                                             | 0.10(3)                                              | -                                                    |
| largest diff. peak/hole [e Å <sup>-3</sup> ] | 1.206 / -0.848                                       | 0.517 / -0.517                                       | 1.352 / -1.085                                       | 0.642 / -0.398                                       | 1.008 / -0.875                                       | 1.098 / -0.793                                       |

Table S1 (continued). Crystal data and structure refinement details for compounds **2–11**.

| Compound                                             | <b>8</b>                                                                                         | <b>9</b>                                                                                                  | <b>10</b>                                                            | <b>11</b>                                                             |
|------------------------------------------------------|--------------------------------------------------------------------------------------------------|-----------------------------------------------------------------------------------------------------------|----------------------------------------------------------------------|-----------------------------------------------------------------------|
| formula                                              | C <sub>102</sub> H <sub>130</sub> Ga <sub>2</sub> N <sub>6</sub> Na <sub>2</sub> O <sub>12</sub> | C <sub>194.96</sub> H <sub>260.09</sub> Ga <sub>4</sub> N <sub>8</sub> Na <sub>4</sub> O <sub>25.04</sub> | C <sub>51</sub> H <sub>79</sub> GaN <sub>5</sub> NaO <sub>7</sub> Si | C <sub>51</sub> H <sub>75</sub> ClGa <sub>2</sub> NaO <sub>4</sub> Si |
| <i>M<sub>r</sub></i> [g mol <sup>-1</sup> ]          | 1817.53                                                                                          | 3487.12                                                                                                   | 994.99                                                               | 936.38                                                                |
| crystal system                                       | Tetragonal                                                                                       | Monoclinic                                                                                                | Orthorhombic                                                         | Orthorhombic                                                          |
| space group                                          | <i>P</i> 4 <sub>1</sub> 2 <sub>1</sub> 2                                                         | <i>C</i> 2/ <i>c</i>                                                                                      | <i>P</i> 2 <sub>1</sub> 2 <sub>1</sub> 2 <sub>1</sub>                | <i>A</i> ma2                                                          |
| <i>a</i> [Å]                                         | 15.1442(16)                                                                                      | 39.1509(17)                                                                                               | 12.7877(7)                                                           | 19.4444(7)                                                            |
| <i>b</i> [Å]                                         | 15.1442(16)                                                                                      | 13.2466(6)                                                                                                | 18.0210(9)                                                           | 17.6536(6)                                                            |
| <i>c</i> [Å]                                         | 43.794(5)                                                                                        | 39.4570(17)                                                                                               | 23.4640(13)                                                          | 14.8679(5)                                                            |
| α [°]                                                | 90                                                                                               | 90                                                                                                        | 90                                                                   | 90                                                                    |
| β [°]                                                | 90                                                                                               | 112.069(1)                                                                                                | 90                                                                   | 90                                                                    |
| γ [°]                                                | 90                                                                                               | 90                                                                                                        | 90                                                                   | 90                                                                    |
| <i>V</i> [Å <sup>3</sup> ]                           | 10044(2)                                                                                         | 18963.8(14)                                                                                               | 5407.2(5)                                                            | 5103.6(3)                                                             |
| <i>Z</i>                                             | 4                                                                                                | 4                                                                                                         | 4                                                                    | 4                                                                     |
| ρ <sub>calc.</sub> [g cm <sup>-3</sup> ]             | 1.202                                                                                            | 1.221                                                                                                     | 1.222                                                                | 1.219                                                                 |
| μ [mm <sup>-1</sup> ]                                | 0.605                                                                                            | 0.638                                                                                                     | 0.591                                                                | 0.667                                                                 |
| <i>F</i> (000)                                       | 3856                                                                                             | 7417                                                                                                      | 2128                                                                 | 2000                                                                  |
| crystal size, [mm <sup>3</sup> ]                     | 0.34 × 0.19 × 0.12                                                                               | 0.49 × 0.34 × 0.19                                                                                        | 0.31 × 0.15 × 0.07                                                   | 0.597 × 0.224 × 0.202                                                 |
| θ <sub>min</sub> /θ <sub>max</sub> [°]               | 2.36 / 26.00                                                                                     | 2.10 / 27.00                                                                                              | 2.07 / 26.02                                                         | 2.31 / 28.00                                                          |
| index ranges                                         | -18 ≤ <i>h</i> ≤ 16,<br>-17 ≤ <i>k</i> ≤ 18,<br>-53 ≤ <i>l</i> ≤ 54                              | -49 ≤ <i>h</i> ≤ 50,<br>-16 ≤ <i>k</i> ≤ 16,<br>-50 ≤ <i>l</i> ≤ 50                                       | -15 ≤ <i>h</i> ≤ 14,<br>-21 ≤ <i>k</i> ≤ 22,<br>-28 ≤ <i>l</i> ≤ 26  | -25 ≤ <i>h</i> ≤ 25,<br>-23 ≤ <i>k</i> ≤ 23,<br>-19 ≤ <i>l</i> ≤ 19   |
| reflections collected                                | 91251                                                                                            | 119240                                                                                                    | 54438                                                                | 35057                                                                 |
| independent reflections                              | 9887                                                                                             | 20501                                                                                                     | 10644                                                                | 6304                                                                  |
| <i>R</i> <sub>int</sub>                              | 0.1388                                                                                           | 0.0760                                                                                                    | 0.0858                                                               | 0.0259                                                                |
| max/min transmission                                 | 0.8704/ 0.4475                                                                                   | 0.8496/ 0.6470                                                                                            | 0.9194/ 0.6593                                                       | 0.8497/ 0.7687                                                        |
| data/restraints/<br>parameters                       | 9887 / 864 / 627                                                                                 | 20501 / 77 / 1142                                                                                         | 10644 / 0 / 612                                                      | 6304 / 82 / 342                                                       |
| GOF on <i>F</i> <sup>2</sup>                         | 1.029                                                                                            | 1.075                                                                                                     | 1.031                                                                | 1.033                                                                 |
| final <i>R</i> indices [ <i>I</i> > 2σ ( <i>I</i> )] | 0.0617 / 0.1380                                                                                  | 0.0869 / 0.1935                                                                                           | 0.0484 / 0.0852                                                      | 0.0348 / 0.0898                                                       |
| <i>R</i> indices (all data)                          | 0.1046 / 0.1515                                                                                  | 0.1147 / 0.2038                                                                                           | 0.0780 / 0.0945                                                      | 0.0382 / 0.0917                                                       |
| Absolute structure parameter                         | 0.07(2)                                                                                          | -                                                                                                         | 0.004(5)                                                             | 0.026(3)                                                              |
| largest diff. peak/hole [e Å <sup>-3</sup> ]         | 0.381 / -0.450                                                                                   | 1.241 / -0.900                                                                                            | 0.347 / -0.307                                                       | 0.507 / -0.339                                                        |

**Computational details.** The full geometry optimization of all model structures was carried out at the B3LYP/6-31G\* level of theory with the help of Gaussian-09 program package.<sup>13</sup> No symmetry restrictions have been applied during the geometry optimization procedure. The Hessian matrices were calculated analytically for all optimized model structures to prove the location of correct minimum on the potential energy surface (no imaginary frequencies were found in all cases) and to estimate the thermodynamic parameters, the latter being calculated at 25 °C (Tables S2 and S3). The Cartesian atomic coordinates for all optimized equilibrium model structures are presented in the attached xyz-files.

Table S2. Calculated total energies, enthalpies, Gibbs free energies (in Hartree), and entropies (in cal/mol·K) for optimized equilibrium model structures (E, H, G, and S, respectively).

| No | Model structure                                        | E            | H            | G            | S       |
|----|--------------------------------------------------------|--------------|--------------|--------------|---------|
| 1  | <b>1H</b>                                              | -2956.735463 | -2956.383601 | -2956.455627 | 151.592 |
| 2  | <b>2H</b>                                              | -6290.683779 | -6289.945959 | -6290.082189 | 286.720 |
| 3  | <b>5H</b>                                              | -6252.638736 | -6251.906467 | -6252.040322 | 281.721 |
| 4  | <b>6H</b>                                              | -4261.522617 | -4260.741481 | -4260.874103 | 279.126 |
| 5  | <b>7H</b>                                              | -3448.100138 | -3447.623225 | -3447.719030 | 201.638 |
| 6  | <b>8H</b>                                              | -3431.802145 | -3431.330191 | -3431.422958 | 195.244 |
| 7  | <b>10H</b>                                             | -3605.580316 | -3605.084742 | -3605.187835 | 216.978 |
| 8  | <b>11H</b>                                             | -3901.611232 | -3901.129250 | -3901.228471 | 208.828 |
| 9  | <b>CO</b>                                              | -113.309454  | -113.301118  | -113.323561  | 47.236  |
| 10 | <b>CO<sub>2</sub></b>                                  | -188.580940  | -188.565756  | -188.590721  | 52.543  |
| 11 | <b>INT[Ga<sub>2</sub>(CO<sub>3</sub>)<sub>2</sub>]</b> | -6441.239620 | -6440.489694 | -6440.630831 | 297.050 |
| 12 | <b>INT[Ga<sub>2</sub>O<sub>2</sub>]</b>                | -6063.995440 | -6063.281031 | -6063.407271 | 265.694 |
| 13 | <b>INT[GaC<sub>2</sub>O<sub>4</sub>]</b>               | -3333.945157 | -3333.559772 | -3333.645843 | 181.151 |
| 14 | <b>INT[GaCO<sub>2</sub>]</b>                           | -3145.317403 | -3144.949485 | -3145.032892 | 175.544 |
| 15 | <b>INT[GaCO<sub>2</sub>OCNPh]</b>                      | -3545.120092 | -3544.636680 | -3544.733211 | 203.166 |
| 16 | <b>INT[GaCO<sub>3</sub>]</b>                           | -3220.622057 | -3220.247762 | -3220.328508 | 169.943 |
| 17 | <b>INT[GaO]</b>                                        | -3031.957188 | -3031.600324 | -3031.675081 | 157.339 |
| 18 | <b>MeNCO</b>                                           | -207.988079  | -207.931484  | -207.964420  | 69.320  |
| 19 | <b>Ph<sub>2</sub>CCO</b>                               | -614.708265  | -614.499064  | -614.551802  | 110.997 |
| 20 | <b>PhNC</b>                                            | -324.457896  | -324.351979  | -324.389485  | 78.938  |
| 21 | <b>PhNCO</b>                                           | -399.732515  | -399.620397  | -399.660835  | 85.109  |
| 22 | <b>TMSCI</b>                                           | -869.522591  | -869.399510  | -869.441657  | 88.704  |
| 23 | <b>TMSN<sub>3</sub></b>                                | -573.495628  | -573.358925  | -573.406058  | 99.200  |

Table S3. Calculated values of total electronic reaction energies ( $\Delta E$ ), enthalpies and Gibbs free energies of reaction ( $\Delta H$  and  $\Delta G$ ) for various hypothetical transformations (in kcal/mol).

| Transformation                                                              | $\Delta E$ | $\Delta H$ | $\Delta G$ |
|-----------------------------------------------------------------------------|------------|------------|------------|
| <b>5H <math>\rightarrow</math> 2 INT[GaO] + CO<sub>2</sub></b>              | 90.0       | 87.9       | 62.4       |
| <b>2H <math>\rightarrow</math> 2 INT[GaO] + 2 CO</b>                        | 94.4       | 89.8       | 53.3       |
| <b>2 INT[GaO] <math>\rightarrow</math> INT[Ga<sub>2</sub>O<sub>2</sub>]</b> | -50.9      | -50.4      | -35.8      |
| <b>INT[GaO] + 2 Ph<sub>2</sub>CCO <math>\rightarrow</math> 6H</b>           | -93.4      | -89.8      | -59.9      |
| <b>INT[GaO] + 2 MeNCO <math>\rightarrow</math> 7H</b>                       | -104.7     | -100.4     | -72.2      |
| <b>INT[GaO] + PhNCO <math>\rightarrow</math> 8H</b>                         | -70.6      | -68.7      | -54.6      |
| <b>2H + 4 Ph<sub>2</sub>CCO <math>\rightarrow</math> 2 6H + 2 CO</b>        | -92.4      | -89.7      | -66.5      |
| <b>2H + 4 MeNCO <math>\rightarrow</math> 2 7H + 2 CO</b>                    | -114.9     | -110.9     | -91.2      |
| <b>2H + 2 PhNCO <math>\rightarrow</math> 2 8H + 2 CO</b>                    | -46.7      | -47.6      | -56.0      |
| <b>2H + 2 TMSN<sub>3</sub> <math>\rightarrow</math> 2 10H + 2 CO</b>        | -65.6      | -67.7      | -80.6      |

|                                                                                                 |       |       |       |
|-------------------------------------------------------------------------------------------------|-------|-------|-------|
| $2\text{H} + 2\text{TMSCl} \rightarrow 2\text{1H} + 2\text{CO}$                                 | -70.5 | -72.6 | -86.9 |
| $2\text{1H} + 2\text{CO}_2 \rightarrow 2\text{H}$                                               | -32.0 | -29.6 | 6.6   |
| $\text{1H} + \text{CO}_2 \rightarrow \text{INT}[\text{GaCO}_2]$                                 | -0.6  | -0.1  | 8.4   |
| $2\text{H} \rightarrow 2\text{INT}[\text{GaCO}_2]$                                              | 30.7  | 29.5  | 10.3  |
| $\text{INT}[\text{GaCO}_2] + \text{PhNCO} \rightarrow \text{INT}[\text{GaCO}_2\text{OCNPh}]$    | -44.0 | -41.9 | -24.8 |
| $\text{INT}[\text{GaCO}_2\text{OCNPh}] \rightarrow \text{CO} + 8\text{H}$                       | 5.3   | 3.4   | -8.4  |
| $2\text{H} + \text{CO}_2 \rightarrow 5\text{H} + 2\text{CO}$                                    | 4.4   | 1.9   | -9.1  |
| $\text{INT}[\text{GaCO}_2] + \text{CO}_2 \rightarrow \text{INT}[\text{GaC}_2\text{O}_4]$        | -29.4 | -27.9 | -13.9 |
| $\text{INT}[\text{GaC}_2\text{O}_4] \rightarrow \text{CO} + \text{INT}[\text{GaCO}_3]$          | 8.6   | 6.8   | -3.9  |
| $2\text{INT}[\text{GaCO}_3] \rightarrow \text{INT}[\text{Ga}_2(\text{CO}_3)_2]$                 | 2.8   | 3.7   | 16.4  |
| $\text{INT}[\text{Ga}_2(\text{CO}_3)_2] \rightarrow \text{CO}_2 + 5\text{H}$                    | 12.5  | 11.0  | -0.1  |
| $\text{INT}[\text{GaCO}_2] + \text{PhNCO} \rightarrow \text{PhNC} + \text{INT}[\text{GaCO}_3]$  | -18.8 | -18.7 | -15.2 |
| $2\text{INT}[\text{GaCO}_2] + 2\text{PhNCO} \rightarrow 5\text{H} + \text{CO}_2 + 2\text{PhNC}$ | -22.4 | -22.9 | -14.2 |

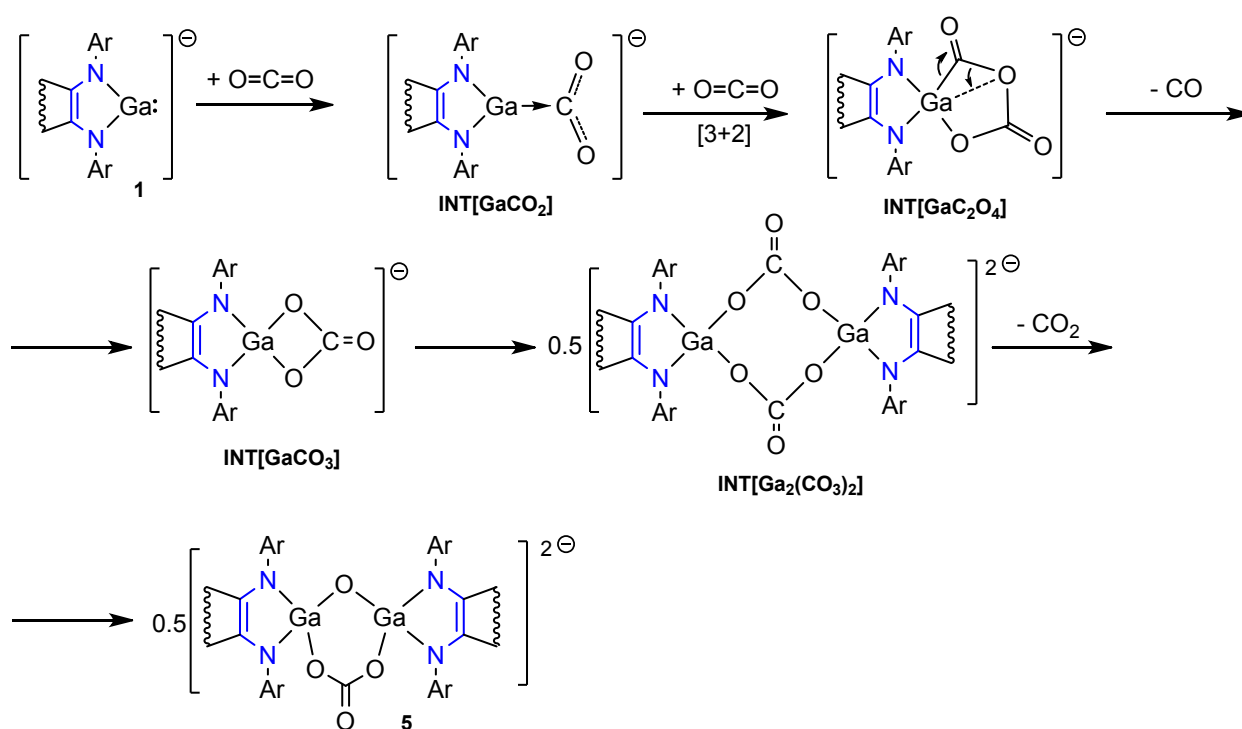

Scheme S1. Possible mechanism for formation of **5**.

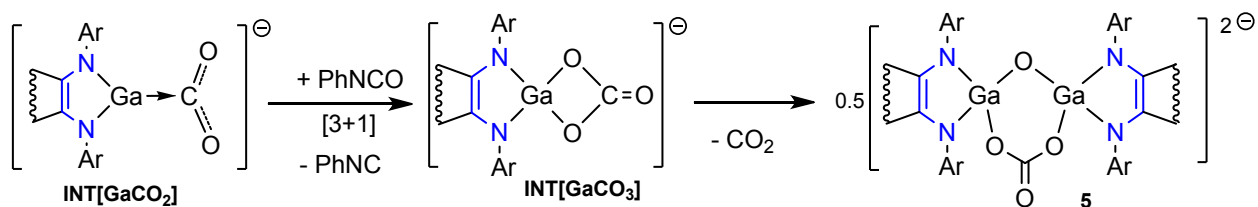

Scheme S2. Alternate reaction path for the reaction modification of  $\text{CO}_2$  with phenylisocyanate.



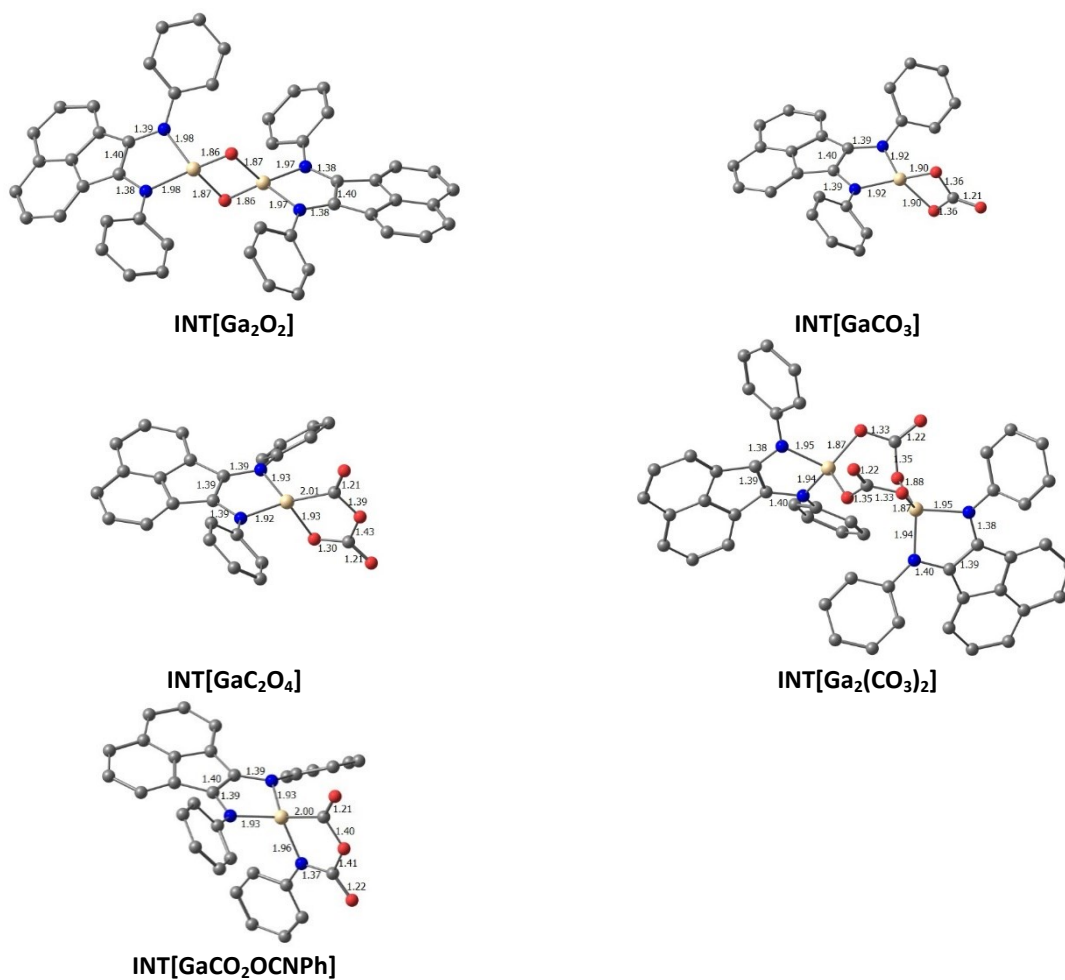

Figure S41. Optimized equilibrium structures of possible intermediates labelled with selected bond lengths.

Table S4. Distribution of NBO atomic charges in optimized equilibrium structures of model compounds **1H, 2H, 5H-8H, 10H and 11H**.

| Compound          | 1H       | 2H       | 5H       | 6H       | 7H       | 8H       | 10H      | 11H      |
|-------------------|----------|----------|----------|----------|----------|----------|----------|----------|
| Ga centers        | 0.51873  | 3.03825  | 3.5748   | 1.82037  | 1.79963  | 1.75526  | 1.77039  | 1.67168  |
| L moieties        | no       | -2.13526 | -2.63906 | -1.44892 | -1.40823 | -1.39613 | -1.36617 | -1.25646 |
| dpp-bian moieties | -1.51876 | -2.903   | -2.93573 | -1.37142 | -1.39139 | -1.35915 | -1.40415 | -1.41521 |

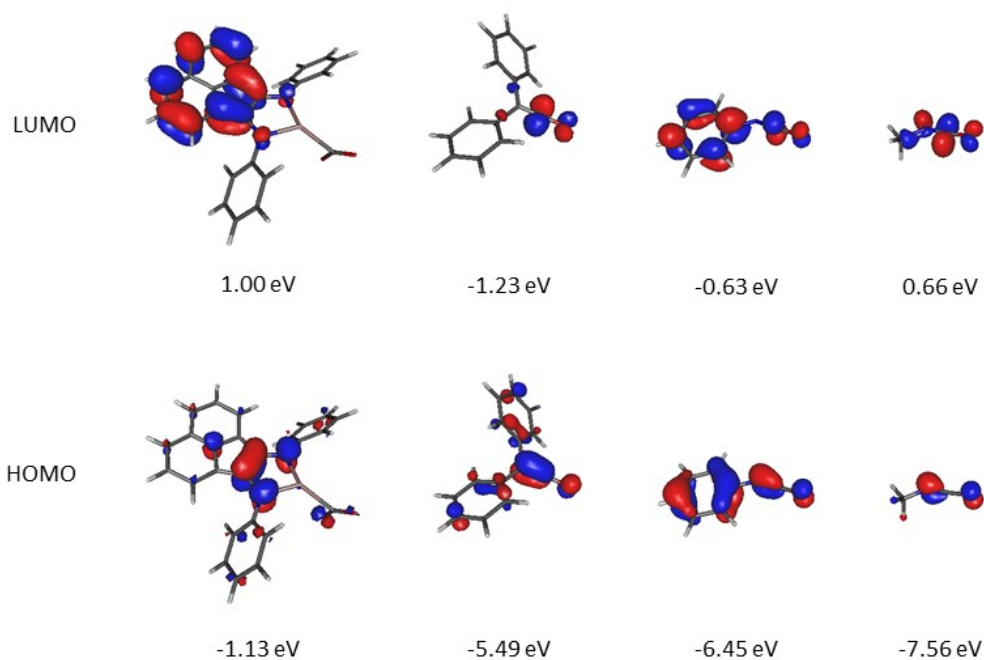

Figure S42. Shape and energies of HOMOs and LUMOs in optimized equilibrium model structures **INT[GaCO<sub>2</sub>], Ph<sub>2</sub>CCO, PhNCO and MeNCO.**

Table S5. NBO atomic charges in optimized equilibrium structures of model compounds **1H, 2H, 5H and 6H.**

| Atom  | <b>1H</b> | Atom  | <b>2H</b> | Atom  | <b>5H</b> | Atom  | <b>6H</b> |
|-------|-----------|-------|-----------|-------|-----------|-------|-----------|
| C 1   | -0.23379  | C 1   | -0.23505  | C 1   | -0.23483  | C 1   | -0.22528  |
| C 2   | -0.24065  | C 2   | -0.24044  | C 2   | -0.24024  | C 2   | -0.23912  |
| C 3   | -0.23106  | C 3   | -0.23721  | C 3   | -0.23535  | C 3   | -0.22295  |
| C 4   | -0.07277  | C 4   | -0.07441  | C 4   | -0.0738   | C 4   | -0.07083  |
| C 5   | -0.03454  | C 5   | -0.03226  | C 5   | -0.03264  | C 5   | -0.03177  |
| C 6   | -0.03628  | C 6   | -0.02961  | C 6   | -0.03048  | C 6   | -0.03968  |
| C 7   | -0.23105  | C 7   | -0.23266  | C 7   | -0.23292  | C 7   | -0.22106  |
| C 8   | -0.24065  | C 8   | -0.24235  | C 8   | -0.24207  | C 8   | -0.24009  |
| C 9   | -0.23379  | C 9   | -0.23164  | C 9   | -0.23142  | C 9   | -0.22368  |
| C 10  | -0.03629  | C 10  | -0.03106  | C 10  | -0.03224  | C 10  | -0.04158  |
| C 11  | 0.12731   | C 11  | 0.12332   | C 11  | 0.12547   | C 11  | 0.12333   |
| C 12  | 0.12734   | C 12  | 0.1354    | C 12  | 0.13383   | C 12  | 0.13341   |
| N 13  | -0.7768   | N 13  | -0.75233  | N 13  | -0.75966  | N 13  | -0.80232  |
| N 14  | -0.77683  | N 14  | -0.75787  | N 14  | -0.75575  | N 14  | -0.79373  |
| C 15  | 0.18268   | C 15  | 0.18933   | C 15  | 0.18967   | C 15  | 0.17611   |
| C 16  | -0.26025  | C 16  | -0.25721  | C 16  | -0.25323  | C 16  | -0.26818  |
| Ga 17 | 0.51873   | O 17  | -0.83097  | O 17  | -0.88828  | O 17  | -0.83787  |
| C 18  | -0.23589  | Ga 18 | 1.51631   | Ga 18 | 1.7902    | Ga 18 | 1.82037   |
| C 19  | -0.28917  | C 19  | -0.23332  | C 19  | -0.23271  | C 19  | -0.23152  |
| C 20  | -0.23669  | C 20  | -0.29156  | C 20  | -0.29417  | C 20  | -0.27072  |
| C 21  | -0.28319  | C 21  | -0.23676  | C 21  | -0.23749  | C 21  | -0.23473  |
| C 22  | 0.18266   | C 22  | -0.28815  | C 22  | -0.29487  | C 22  | -0.25988  |
| C 23  | -0.28319  | C 23  | 0.18989   | C 23  | 0.19486   | C 23  | 0.17821   |



|      |          |       |          |       |          |      |          |
|------|----------|-------|----------|-------|----------|------|----------|
| C 24 | -0.23668 | C 24  | -0.29366 | C 24  | -0.3032  | C 24 | -0.26796 |
| C 25 | -0.28917 | C 25  | -0.23565 | C 25  | -0.23449 | C 25 | -0.2288  |
| C 26 | -0.23589 | C 26  | -0.29439 | C 26  | -0.2976  | C 26 | -0.27878 |
| C 27 | -0.26027 | C 27  | -0.22599 | C 27  | -0.22367 | C 27 | -0.22975 |
| H 28 | 0.24115  | C 28  | -0.25517 | C 28  | -0.25619 | C 28 | -0.28295 |
| H 29 | 0.22122  | H 29  | 0.24354  | H 29  | 0.24398  | H 29 | 0.24359  |
| H 30 | 0.21755  | H 30  | 0.218    | H 30  | 0.21863  | H 30 | 0.22616  |
| H 31 | 0.21755  | H 31  | 0.21298  | H 31  | 0.21333  | H 31 | 0.22214  |
| H 32 | 0.22122  | H 32  | 0.21325  | H 32  | 0.2134   | H 32 | 0.22225  |
| H 33 | 0.24115  | H 33  | 0.21804  | H 33  | 0.21815  | H 33 | 0.22596  |
| H 34 | 0.23742  | H 34  | 0.24333  | H 34  | 0.24374  | H 34 | 0.24259  |
| H 35 | 0.21904  | H 35  | 0.24904  | H 35  | 0.25353  | H 35 | 0.24316  |
| H 36 | 0.2156   | H 36  | 0.22799  | H 36  | 0.22934  | H 36 | 0.22596  |
| H 37 | 0.21875  | H 37  | 0.21241  | H 37  | 0.21093  | H 37 | 0.22322  |
| H 38 | 0.23734  | H 38  | 0.21426  | H 38  | 0.21294  | H 38 | 0.22867  |
| H 39 | 0.23734  | H 39  | 0.23626  | H 39  | 0.2342   | H 39 | 0.25013  |
| H 40 | 0.21875  | H 40  | 0.23388  | H 40  | 0.23144  | H 40 | 0.25225  |
| H 41 | 0.2156   | H 41  | 0.21191  | H 41  | 0.21131  | H 41 | 0.23097  |
| H 42 | 0.21904  | H 42  | 0.21042  | H 42  | 0.21094  | H 42 | 0.2216   |
| H 43 | 0.23742  | H 43  | 0.23486  | H 43  | 0.22995  | H 43 | 0.22366  |
|      |          | H 44  | 0.24024  | H 44  | 0.23774  | H 44 | 0.24057  |
|      |          | C 45  | -0.23881 | C 45  | -0.22794 | C 45 | -0.1623  |
|      |          | C 46  | -0.24053 | C 46  | -0.24284 | O 46 | -0.84616 |
|      |          | C 47  | -0.23801 | C 47  | -0.22972 | C 47 | 0.41539  |
|      |          | C 48  | -0.07632 | C 48  | -0.07362 | C 48 | -0.04196 |
|      |          | C 49  | -0.03096 | C 49  | -0.03241 | C 49 | -0.19957 |
|      |          | C 50  | -0.03179 | C 50  | -0.03186 | C 50 | -0.23598 |
|      |          | C 51  | -0.23407 | C 51  | -0.23812 | C 51 | -0.24818 |
|      |          | C 52  | -0.24232 | C 52  | -0.23966 | C 52 | -0.24018 |
|      |          | C 53  | -0.2358  | C 53  | -0.23537 | C 53 | -0.22432 |
|      |          | C 54  | -0.03268 | C 54  | -0.03059 | C 54 | -0.03381 |
|      |          | C 55  | 0.12553  | C 55  | 0.14087  | C 55 | -0.22662 |
|      |          | C 56  | 0.13771  | C 56  | 0.11752  | C 56 | -0.24366 |
|      |          | N 57  | -0.7603  | N 57  | -0.76848 | C 57 | -0.25242 |
|      |          | N 58  | -0.75695 | N 58  | -0.75245 | C 58 | -0.24004 |
|      |          | C 59  | 0.18489  | C 59  | 0.19194  | C 59 | -0.20634 |
|      |          | C 60  | -0.26214 | C 60  | -0.29818 | H 60 | 0.24141  |
|      |          | O 61  | -0.83601 | O 61  | -0.89452 | H 61 | 0.2266   |
|      |          | Ga 62 | 1.52194  | Ga 62 | 1.7846   | H 62 | 0.22297  |
|      |          | C 63  | -0.23343 | C 63  | -0.23631 | H 63 | 0.2267   |
|      |          | C 64  | -0.29197 | C 64  | -0.29636 | H 64 | 0.24289  |
|      |          | C 65  | -0.23597 | C 65  | -0.2292  | H 65 | 0.23382  |
|      |          | C 66  | -0.27946 | C 66  | -0.24677 | H 66 | 0.22215  |
|      |          | C 67  | 0.1857   | C 67  | 0.19096  | H 67 | 0.22143  |
|      |          | C 68  | -0.26066 | C 68  | -0.25468 | H 68 | 0.22772  |
|      |          | C 69  | -0.23492 | C 69  | -0.23304 | H 69 | 0.25501  |

|  |  |      |          |      |          |      |          |
|--|--|------|----------|------|----------|------|----------|
|  |  | C 70 | -0.2914  | C 70 | -0.29496 | C 70 | -0.20834 |
|  |  | C 71 | -0.23645 | C 71 | -0.23688 | O 71 | -0.61085 |
|  |  | C 72 | -0.2855  | C 72 | -0.29542 | C 72 | 0.8536   |
|  |  | H 73 | 0.24245  | H 73 | 0.24446  | C 73 | -0.00906 |
|  |  | H 74 | 0.21762  | H 74 | 0.2188   | C 74 | -0.22687 |
|  |  | H 75 | 0.21278  | H 75 | 0.21375  | C 75 | -0.2317  |
|  |  | H 76 | 0.21304  | H 76 | 0.21324  | C 76 | -0.24656 |
|  |  | H 77 | 0.21766  | H 77 | 0.21823  | C 77 | -0.23764 |
|  |  | H 78 | 0.24176  | H 78 | 0.24352  | C 78 | -0.20114 |
|  |  | H 79 | 0.25545  | H 79 | 0.23371  | C 79 | -0.01669 |
|  |  | H 80 | 0.22743  | H 80 | 0.21223  | C 80 | -0.22868 |
|  |  | H 81 | 0.21615  | H 81 | 0.21095  | C 81 | -0.23327 |
|  |  | H 82 | 0.21708  | H 82 | 0.22673  | C 82 | -0.2428  |
|  |  | H 83 | 0.23918  | H 83 | 0.24004  | C 83 | -0.22833 |
|  |  | H 84 | 0.25113  | H 84 | 0.25111  | C 84 | -0.22818 |
|  |  | H 85 | 0.22764  | H 85 | 0.23292  | H 85 | 0.24299  |
|  |  | H 86 | 0.21253  | H 86 | 0.21299  | H 86 | 0.22502  |
|  |  | H 87 | 0.21442  | H 87 | 0.2134   | H 87 | 0.22204  |
|  |  | H 88 | 0.23769  | H 88 | 0.2334   | H 88 | 0.22802  |
|  |  | C 89 | 0.39581  | C 89 | 1.04985  | H 89 | 0.24322  |
|  |  | O 90 | -0.63799 | O 90 | -0.67185 | H 90 | 0.25358  |
|  |  | C 91 | 0.4015   | O 91 | -1.23426 | H 91 | 0.22776  |
|  |  | O 92 | -0.6276  |      |          | H 92 | 0.22531  |
|  |  |      |          |      |          | H 93 | 0.23469  |
|  |  |      |          |      |          | H 94 | 0.24828  |

Table S6. NBO atomic charges in optimized equilibrium structures of model compounds **7H**, **8H**, **10H** and **11H**.

|       | <b>7H</b> |      | <b>8H</b> |      | <b>10H</b> |      | <b>11H</b> |
|-------|-----------|------|-----------|------|------------|------|------------|
| C 1   | -0.22296  | C 1  | -0.22248  | Ga 1 | 1.77039    | C 1  | -0.22595   |
| C 2   | -0.23967  | C 2  | -0.23945  | Si 2 | 2.04867    | C 2  | -0.24002   |
| C 3   | -0.2213   | C 3  | -0.22081  | O 3  | -1.25405   | C 3  | -0.22448   |
| C 4   | -0.06984  | C 4  | -0.06965  | N 4  | -0.77725   | C 4  | -0.07096   |
| C 5   | -0.03256  | C 5  | -0.03284  | N 5  | -0.77723   | C 5  | -0.03252   |
| C 6   | -0.0392   | C 6  | -0.04018  | N 6  | -0.68818   | C 6  | -0.03711   |
| C 7   | -0.22165  | C 7  | -0.22085  | N 7  | 0.21089    | C 7  | -0.22447   |
| C 8   | -0.23947  | C 8  | -0.23944  | N 8  | -0.20294   | C 8  | -0.24003   |
| C 9   | -0.22364  | C 9  | -0.22252  | C 9  | 0.12857    | C 9  | -0.22595   |
| C 10  | -0.03887  | C 10 | -0.04017  | C 10 | 0.12859    | C 10 | -0.03711   |
| C 11  | 0.12844   | C 11 | 0.12717   | C 11 | -0.03793   | C 11 | 0.12825    |
| C 12  | 0.1269    | C 12 | 0.12706   | C 12 | -0.03215   | C 12 | 0.12828    |
| N 13  | -0.77875  | N 13 | -0.7812   | C 13 | -0.03793   | N 13 | -0.77681   |
| N 14  | -0.78172  | N 14 | -0.78113  | C 14 | -0.22473   | N 14 | -0.77683   |
| C 15  | 0.18459   | C 15 | 0.18305   | H 15 | 0.24327    | C 15 | 0.18827    |
| C 16  | -0.26195  | C 16 | -0.2889   | C 16 | -0.23976   | C 16 | -0.28828   |
| Ga 17 | 1.79963   | O 17 | -0.84303  | H 17 | 0.22487    | O 17 | -1.25846   |

|      |          |       |          |      |          |       |          |
|------|----------|-------|----------|------|----------|-------|----------|
| C 18 | -0.22579 | Ga 18 | 1.75526  | C 18 | -0.22327 | Ga 18 | 1.67168  |
| C 19 | -0.28477 | C 19  | -0.22929 | H 19 | 0.22095  | C 19  | -0.23057 |
| C 20 | -0.22887 | C 20  | -0.28118 | C 20 | -0.07051 | C 20  | -0.28746 |
| C 21 | -0.29276 | C 21  | -0.22553 | C 21 | -0.22326 | C 21  | -0.231   |
| C 22 | 0.18159  | C 22  | -0.25731 | H 22 | 0.22095  | C 22  | -0.26333 |
| C 23 | -0.2916  | C 23  | 0.18304  | C 23 | -0.23977 | C 23  | 0.18827  |
| C 24 | -0.22949 | C 24  | -0.28888 | H 24 | 0.22486  | C 24  | -0.28827 |
| C 25 | -0.28354 | C 25  | -0.22931 | C 25 | -0.22474 | C 25  | -0.23057 |
| C 26 | -0.22678 | C 26  | -0.28116 | H 26 | 0.24327  | C 26  | -0.28746 |
| C 27 | -0.26293 | C 27  | -0.22553 | C 27 | 0.18828  | C 27  | -0.231   |
| H 28 | 0.2436   | C 28  | -0.25728 | C 28 | -0.28755 | C 28  | -0.26334 |
| H 29 | 0.22609  | H 29  | 0.24433  | C 29 | -0.22993 | C 29  | -1.21024 |
| H 30 | 0.22214  | H 30  | 0.22662  | H 30 | 0.22158  | Si 30 | 2.04996  |
| H 31 | 0.22213  | H 31  | 0.22259  | C 31 | -0.28624 | C 31  | -1.22082 |
| H 32 | 0.22612  | H 32  | 0.22258  | H 32 | 0.21898  | C 32  | -1.22081 |
| H 33 | 0.24372  | H 33  | 0.22662  | C 33 | -0.23037 | H 33  | 0.24326  |
| H 34 | 0.2387   | H 34  | 0.24432  | H 34 | 0.2243   | H 34  | 0.22439  |
| H 35 | 0.22727  | H 35  | 0.23865  | C 35 | -0.2631  | H 35  | 0.22046  |
| H 36 | 0.22059  | H 36  | 0.22288  | C 36 | 0.18829  | H 36  | 0.22046  |
| H 37 | 0.22229  | H 37  | 0.22103  | C 37 | -0.28755 | H 37  | 0.22439  |
| H 38 | 0.23803  | H 38  | 0.22833  | C 38 | -0.22993 | H 38  | 0.24327  |
| H 39 | 0.2388   | H 39  | 0.24338  | H 39 | 0.22158  | H 39  | 0.2386   |
| H 40 | 0.2228   | H 40  | 0.23864  | C 40 | -0.28624 | H 40  | 0.22094  |
| H 41 | 0.22088  | H 41  | 0.22288  | H 41 | 0.21898  | H 41  | 0.21825  |
| H 42 | 0.22725  | H 42  | 0.22102  | C 42 | -0.23037 | H 42  | 0.22371  |
| H 43 | 0.24479  | H 43  | 0.22834  | H 43 | 0.2243   | H 43  | 0.24301  |
| O 44 | -0.84565 | H 44  | 0.24341  | C 44 | -0.26311 | H 44  | 0.2386   |
| N 45 | -0.8826  | N 45  | -0.86359 | C 45 | -1.2215  | H 45  | 0.22094  |
| C 46 | 0.83234  | C 46  | 0.93355  | H 46 | 0.24446  | H 46  | 0.21825  |
| O 47 | -0.68846 | O 47  | -0.66427 | H 47 | 0.2294   | H 47  | 0.22371  |
| C 48 | -0.46702 | C 48  | 0.18012  | H 48 | 0.25395  | H 48  | 0.243    |
| H 49 | 0.21837  | C 49  | -0.2649  | C 49 | -1.22149 | H 49  | 0.22897  |
| H 50 | 0.21477  | C 50  | -0.23439 | H 50 | 0.24448  | H 50  | 0.24372  |
| H 51 | 0.24478  | C 51  | -0.2863  | H 51 | 0.25389  | H 51  | 0.24372  |
| N 52 | -0.55849 | C 52  | -0.23145 | H 52 | 0.22941  | H 52  | 0.24553  |
| C 53 | 0.95855  | C 53  | -0.27442 | C 53 | -1.21054 | H 53  | 0.22872  |
| O 54 | -0.66308 | H 54  | 0.23042  | H 54 | 0.24374  | H 54  | 0.25268  |
| C 55 | -0.4608  | H 55  | 0.22212  | H 55 | 0.22991  | H 55  | 0.22872  |
| H 56 | 0.24053  | H 56  | 0.21725  | H 56 | 0.24373  | H 56  | 0.24553  |
| H 57 | 0.23503  | H 57  | 0.22     | H 57 | 0.23899  | H 57  | 0.25268  |
| H 58 | 0.2135   | H 58  | 0.26276  | H 58 | 0.2396   | Cl 58 | -0.56636 |
|      |          |       |          | H 59 | 0.23899  |       |          |
|      |          |       |          | H 60 | 0.23957  |       |          |

## References

1. E. C. Taylor, A. McKillop and G. H. Hawks, *Org. Synth.*, 1972, **52**, 36.
2. I. L. Fedushkin, V. A. Chudakova, G. K. Fukin, S. Dechert, M. Hummert and H. Schumann, *Russ. Chem. Bull.*, 2004, **53**, 2744-2750.
3. G. R. Fulmer, A. J. M. Miller, N. H. Sherden, H. E. Gottlieb, A. Nudelman, B. M. Stoltz, J. E. Bercaw and K. I. Goldberg, *Organometallics*, 2010, **29**, 2176-2179.
4. I. L. Fedushkin, A. N. Lukoyanov, A. N. Tishkina, G. K. Fukin, K. A. Lyssenko and M. Hummert, *Chem. Eur. J.*, 2010, **16**, 7563-7571.
5. I. L. Fedushkin, A. N. Lukoyanov, S. Y. Ketkov, M. Hummert and H. Schumann, *Chem. Eur. J.*, 2007, **13**, 7050-7056.
6. Data Collection, Reduction and Correction Program, CrysAlisPro 1.171.40.67a - Software Package, Rigaku OD (2019).
7. Bruker (2017) SAINT Data Reduction and Correction Program v. 8.38A, Bruker AXS, Madison, Wisconsin, USA.
8. SCALE3 ABSPACK: Empirical absorption correction, CrysAlisPro 1.171.40.67a - Software Package, Rigaku OD (2019).
9. G.M. Sheldrick (2016). SADABS v.2016/2, Bruker/Siemens Area Detector Absorption Correction Program, Bruker AXS, Madison, Wisconsin, USA.
10. G.M. Sheldrick (2015). *Acta Cryst.* A71, 3-8.
11. Sheldrick G.M. SHELXTL. Version 6.14. Structure Determination Software Suite; Madison (WI, USA): Bruker AXS, 2003.
12. A.L. Spek, *Acta Cryst.*, 2015, C71, 9-18.
13. M. J. Frisch, G. W. Trucks, H. B. Schlegel, G. E. Scuseria, M. A. Robb, J. R. Cheeseman, G. Scalmani, V. Barone, B. Mennucci, G. A. Petersson, H. Nakatsuji, M. Caricato, X. Li, H. P. Hratchian, A. F. Izmaylov, J. Bloino, G. Zheng, J. L. Sonnenberg, M. Hada, M. Ehara, K. Toyota, R. Fukuda, J. Hasegawa, M. Ishida, T. Nakajima, Y. Honda, O. Kitao, H. Nakai, T. Vreven, J. A. Montgomery Jr., J. E. Peralta, F. Ogliaro, M. Bearpark, J. J. Heyd, E. Brothers, K. N. Kudin, V. N. Staroverov, T. Keith, R. Kobayashi, J. Normand, K. Raghavachari, A. Rendell, J. C. Burant, S. S. Iyengar, J. Tomasi, M. Cossi, N. Rega, J. M. Millam, M. Klene, J. E. Knox, J. B. Cross, V. Bakken, C. Adamo, J. Jaramillo, R. Gomperts, R. E. Stratmann, O. Yazyev, A. J. Austin, R. Cammi, C. Pomelli, J. W. Ochterski, R. L. Martin, K. Morokuma, V. G. Zakrzewski, G. A. Voth, P. Salvador, J. J. Dannenberg, S. Dapprich, A. D. Daniels, O. Farkas, J. B. Foresman, J. V. Ortiz, J. Cioslowski and D. J. Fox, in *Gaussian 09*, Revision C.01, Gaussian, Inc., Wallingford, CT, 2010.
